# Supplementary material for: Antagonistic paralogs control a switch between growth and pathogen resistance in C. elegans
Source: PLoS Pathog. 2019 Jan 14;15(1):e1007528. doi: 10.1371/journal.ppat.1007528 (PMC6347328; doi:10.1371/journal.ppat.1007528)
Supplement: S8 Table — (XLSX) [file ppat.1007528.s013.xlsx]

## Sheet: Summary
S8 Table - Ortholist results of: IPR genes; genes up in both pals-22/N2 and pals-22/pals-25 comparisons; and genes regulated by hsf-1*.
All gene lists use WS263 annotation
							* hsf-1 data from: Li et al. 2016
Gene set	No. of genes in set	No. w/ predicted human orthologs	Percentage	representation factor**	p-value		** We compare the number of genes in a gene set that overlap (i.e. are conserved) with the total number of conserved genes in our data set. A representation factor <1 suggests that a gene set is comprised of more unconserved genes than one would expect by chance. >1 suggests the opposite.
IPR genes	80	14	0.175	0.3	9.819e-13
Up in pals-22 vs. pals-22 pals-25 and in pals-22 vs. N2	702	279	0.397436	0.7	9.153e-20
Up in hsf-1 vs. control	368	190	0.516304	0.9	0.04
All genes in RNA-seq dataset (post filters)	11387	6404	0.562396	n/a	n/a
IPR genes					Up in pals-22(-) vs. pals-22(-) pals-25(-) and in pals-22(-)/N2					Up in hsf-1(-) vs. control
WBGeneID	Symbol	Gene Locus	Has predicted human ortholog?		WBGene ID	Symbol	Gene Locus	Has predicted human ortholog?		WBGene ID	Symbol	Gene locus	Has predicted human ortholog?
WBGene00001885	his-11	ZK131.5	yes		WBGene00000022	abt-4	Y39D8C.1	yes		WBGene00000039	acn-1	C42D8.5	yes
WBGene00001889	his-15	ZK131.9	yes		WBGene00000088	aex-5	F32A7.6	no		WBGene00000074	adm-2	C04A11.4	yes
WBGene00001918	his-44	F08G2.1	yes		WBGene00000105	alg-1	F48F7.1	yes		WBGene00000149	apl-1	C42D8.8	yes
WBGene00002021	hsp-17	F52E1.7	yes		WBGene00000190	arf-1.1	F45E4.1	yes		WBGene00000197	aars-2	F28H1.3	yes
WBGene00004002	pgp-8	T21E8.3	yes		WBGene00000214	asp-1	Y39B6A.20	yes		WBGene00000248	ben-1	C54C6.2	yes
WBGene00004810	skr-4	Y60A3A.18	yes		WBGene00000285	cal-1	C13C12.1	no		WBGene00000273	brp-1	Y79H2A.1	no
WBGene00004811	skr-5	F47H4.10	yes		WBGene00000294	cas-1	F41G4.2	yes		WBGene00000277	cab-1	C23H4.1	yes
WBGene00007131	pals-26	B0284.1	no		WBGene00000393	cdf-1	C15B12.7	yes		WBGene00000293	cap-2	M106.5	yes
WBGene00007132	pals-27	B0284.2	no		WBGene00000512	ckb-2	B0285.9	yes		WBGene00000373	cyp-14A5	F08F3.7	yes
WBGene00007134	pals-28	B0284.4	no		WBGene00000562	cng-1	F14H8.6	yes		WBGene00000399	cdh-7	R05H10.6	yes
WBGene00007656	pals-2	C17H1.3	no		WBGene00000645	col-69	K01A2.7	yes		WBGene00000415	ced-1	Y47H9C.4	yes
WBGene00007657	pals-3	C17H1.4	no		WBGene00000670	col-95	Y41C4A.16	yes		WBGene00000421	ced-7	C48B4.4	yes
WBGene00007658	pals-4	C17H1.5	no		WBGene00000716	col-143	T15B7.3	yes		WBGene00000458	ceh-37	C37E2.5	yes
WBGene00007659	pals-5	C17H1.6	no		WBGene00000749	col-176	ZC373.7	yes		WBGene00000473	cey-2	F46F11.2	yes
WBGene00007660	pals-6	C17H1.7	no		WBGene00000761	coq-1	C24A11.9	yes		WBGene00000509	cka-1	C28D4.2	yes
WBGene00007661	pals-7	C17H1.8	no		WBGene00000781	cpr-1	C52E4.1	yes		WBGene00000519	cku-70	Y47D3A.4	yes
WBGene00007662	pals-8	C17H1.9	no		WBGene00000783	cpr-3	T10H4.12	yes		WBGene00000545	clp-4	Y39A3CL.5	yes
WBGene00008067		C43D7.4	no		WBGene00000784	cpr-4	F44C4.3	yes		WBGene00000548	clr-1	F56D1.4	yes
WBGene00008267		C53A5.9	yes		WBGene00000785	cpr-5	W07B8.5	yes		WBGene00000603	col-14	C46A5.3	yes
WBGene00008269		C53A5.11	yes		WBGene00000799	crn-6	K04H4.6	yes		WBGene00000683	col-109	Y38C1BA.3	no
WBGene00008301	pals-39	C54D10.7	no		WBGene00000841	cul-6	K08E7.7	yes		WBGene00000699	col-125	C29F4.1	yes
WBGene00008302	pals-38	C54D10.8	no		WBGene00000950	deg-1	C47C12.6	yes		WBGene00000718	col-145	B0222.7	yes
WBGene00008850		F15B9.6	no		WBGene00001025	dnj-7	C55B6.2	yes		WBGene00000734	col-161	C50B6.4	yes
WBGene00009061	pals-14	F22G12.1	no		WBGene00001099	dsc-4	K02D7.4	no		WBGene00000745	col-172	F38B6.5	yes
WBGene00009166		F26F2.1	no		WBGene00001156	ech-7	Y105E8A.4	yes		WBGene00000784	cpr-4	F44C4.3	yes
WBGene00009169		F26F2.4	no		WBGene00001158	ech-9	F01G10.3	yes		WBGene00000962	dhc-1	T21E12.4	yes
WBGene00009898	dod-23	F49E12.2	no		WBGene00001207	egl-43	R53.3	yes		WBGene00000963	dhp-1	R06C7.3	yes
WBGene00009908		F49H6.5	yes		WBGene00001250	elt-2	C33D3.1	yes		WBGene00001172	egl-3	C51E3.7	yes
WBGene00010822		M01G12.9	no		WBGene00001394	fat-2	W02A2.1	no		WBGene00001178	egl-9	F22E12.4	yes
WBGene00012091	pals-29	T27E7.6	no		WBGene00001430	fkb-5	C50F2.6	yes		WBGene00001189	egl-21	F01D4.4	yes
WBGene00012399		Y6E2A.5	no		WBGene00001441	fkh-9	K03C7.2	yes		WBGene00001394	fat-2	W02A2.1	no
WBGene00012400		Y6E2A.7	no		WBGene00001483	fog-3	C03C11.2	yes		WBGene00001489	frm-2	T04C9.6	yes
WBGene00012726		Y39G8B.5	yes		WBGene00001489	frm-2	T04C9.6	yes		WBGene00001493	frm-7	C51F7.1	yes
WBGene00012757		Y41C4A.11	yes		WBGene00001502	ftt-2	F52D10.3	yes		WBGene00001502	ftt-2	F52D10.3	yes
WBGene00012910		Y46G5A.20	no		WBGene00001594	glc-4	C27H5.8	yes		WBGene00001577	gem-4	T12A7.1	yes
WBGene00012961		Y47H10A.5	no		WBGene00001668	gpa-6	F48C11.1	no		WBGene00001607	gln-6	C28D4.3	yes
WBGene00013294	pals-30	Y57G11B.1	no		WBGene00001685	gpd-3	K10B3.7	yes		WBGene00001648	goa-1	C26C6.2	yes
WBGene00014046	clec-60	ZK666.6	no		WBGene00001745	gsa-1	R06A10.2	yes		WBGene00001731	grl-22	W03A5.3	no
WBGene00015223		B0507.6	no		WBGene00001768	gst-20	Y48E1B.10	yes		WBGene00001812	haf-2	F43E2.4	yes
WBGene00015224		B0507.7	no		WBGene00001817	haf-7	Y50E8A.16	yes		WBGene00001946	his-72	Y49E10.6	yes
WBGene00015225		B0507.8	no		WBGene00001883	his-9	ZK131.3	yes		WBGene00001994	hpk-1	F20B6.8	yes
WBGene00015226		B0507.9	no		WBGene00001885	his-11	ZK131.5	yes		WBGene00002024	hsp-43	C14F11.5	yes
WBGene00015227	ddn-1	B0507.10	no		WBGene00001887	his-13	ZK131.7	yes		WBGene00002048	ida-1	B0244.2	yes
WBGene00015600	fbxa-165	C08E3.8	no		WBGene00001889	his-15	ZK131.9	yes		WBGene00002105	ins-22	M04D8.2	no
WBGene00015602	fbxa-158	C08E3.10	no		WBGene00001899	his-25	ZK131.2	yes		WBGene00002240	ksr-2	F58D5.4	yes
WBGene00015605		C08E3.13	no		WBGene00001918	his-44	F08G2.1	yes		WBGene00002250	lap-2	W07G4.4	yes
WBGene00015828	math-14	C16C4.4	no		WBGene00001955	hlh-11	F58A4.7	yes		WBGene00002271	lec-8	R07B1.10	yes
WBGene00015834	math-5	C16C4.10	no		WBGene00002021	hsp-17	F52E1.7	yes		WBGene00002299	let-23	ZK1067.1	yes
WBGene00015839	math-10	C16C4.15	no		WBGene00002041	hum-8	Y66H1A.6	yes		WBGene00002694	let-502	C10H11.9	yes
WBGene00016281	pals-32	C31B8.4	no		WBGene00002055	ifc-1	F37B4.2	yes		WBGene00002783	let-607	F57B10.1	yes
WBGene00016912	clec-86	C54D1.2	yes		WBGene00002090	ins-7	ZK1251.2	no		WBGene00002980	lgg-1	C32D5.9	yes
WBGene00017214		F07E5.9	no		WBGene00002173	itr-1	F33D4.2	yes		WBGene00002981	lgg-2	ZK593.6	yes
WBGene00018345		F42C5.3	no		WBGene00002187	kgb-1	T07A9.3	no		WBGene00003002	lin-13	C03B8.4	yes
WBGene00018353	fbxa-182	F42G2.4	no		WBGene00002188	kgb-2	ZC416.4	no		WBGene00003055	lon-1	F48E8.1	yes
WBGene00018997		F57B9.3	yes		WBGene00002199	kin-15	M176.6	yes		WBGene00003071	lrp-1	F29D11.1	yes
WBGene00020228		T05A8.2	no		WBGene00002215	klc-2	C18C4.10	yes		WBGene00003072	lrp-2	T21E3.3	yes
WBGene00020326	math-38	T07H3.3	no		WBGene00002217	klp-4	F56E3.3	yes		WBGene00003185	mek-1	K08A8.1	yes
WBGene00020357		T08E11.1	no		WBGene00002249	lap-1	ZK353.6	yes		WBGene00003196	mel-11	C06C3.1	yes
WBGene00020774		T24E12.5	no		WBGene00002254	lbp-2	F40F4.2	no		WBGene00003243	mig-10	F10E9.6	yes
WBGene00021081	pals-33	W08A12.4	no		WBGene00002999	lin-10	C09H6.2	yes		WBGene00003247	mig-15	ZC504.4	yes
WBGene00021179	fbxa-86	Y9C9A.12	no		WBGene00003149	mbk-1	T04C10.1	yes		WBGene00003402	mpk-2	C04G6.1	yes
WBGene00022096		Y69A2AR.25	no		WBGene00003243	mig-10	F10E9.6	yes		WBGene00003408	mrp-2	F57C12.4	yes
WBGene00022375		Y94H6A.2	no		WBGene00003248	mig-17	F57B7.4	no		WBGene00003423	msi-1	R10E9.1	yes
WBGene00022476	fbxa-75	Y119D3A.1	no		WBGene00003374	mlk-1	K11D12.10	yes		WBGene00003476	mtm-3	T24A11.1	yes
WBGene00022497		Y119D3B.21	no		WBGene00003411	mrp-5	F14F4.3	yes		WBGene00003482	mua-3	K08E5.3	yes
WBGene00022547		ZC196.3	no		WBGene00003412	mrp-6	F20B6.3	yes		WBGene00003485	mua-6	W10G6.3	yes
WBGene00022550	droe-8	ZC196.6	no		WBGene00003519	nac-3	K08E5.2	yes		WBGene00003497	mup-4	K07D8.1	yes
WBGene00023483		Y75B8A.39	no		WBGene00003555	nas-39	F38E9.2	yes		WBGene00003530	nas-11	K11G12.1	no
WBGene00044212		Y68A4A.13	no		WBGene00003564	ncs-2	F10G8.5	yes		WBGene00003561	ncr-1	F02E8.6	yes
WBGene00044237	pals-9	C17H1.10	no		WBGene00003567	ncx-2	C10G8.5	yes		WBGene00003588	nex-1	ZC155.1	yes
WBGene00044708	pals-11	C17H1.13	no		WBGene00003583	ndx-6	EEED8.8	yes		WBGene00003593	nfm-1	F42A10.2	yes
WBGene00044709	pals-12	C17H1.14	no		WBGene00003597	nhl-1	F54G8.4	yes		WBGene00003647	nhr-57	T05B4.2	no
WBGene00044787	pals-36	C54D10.12	no		WBGene00003602	nhr-3	H01A20.1	no		WBGene00003731	nhx-3	C54F6.13	yes
WBGene00045393		F26D11.13	no		WBGene00003607	nhr-8	F33D4.1	yes		WBGene00003733	nhx-5	F57C7.2	yes
WBGene00045401	eol-1	T26F2.3	no		WBGene00003621	nhr-22	K06A1.4	yes		WBGene00003746	nlp-8	D2005.2	no
WBGene00045416		Y37H2A.14	no		WBGene00003655	nhr-65	Y17D7A.3	no		WBGene00003749	nlp-11	ZK1320.10	no
WBGene00050899		T10C6.15	no		WBGene00003688	nhr-98	M02H5.6	no		WBGene00003752	nlp-14	D1009.4	no
WBGene00086568		Y2H9A.6	no		WBGene00003696	nhr-106	T01G6.4	no		WBGene00003812	nrf-5	F55B12.5	no
WBGene00138721	pals-37	C54D10.14	no		WBGene00003702	nhr-112	Y70C5C.6	no		WBGene00003930	pat-3	ZK1058.2	yes
WBGene00195165		F57G4.11	no		WBGene00003720	nhr-130	T01G6.8	no		WBGene00003943	pbo-4	K09C8.1	yes
					WBGene00003730	nhx-2	B0495.4	yes		WBGene00003989	pfn-1	Y18D10A.20	yes
					WBGene00003828	nuc-1	C07B5.5	yes		WBGene00004025	phy-2	F35G2.4	yes
					WBGene00003903	pab-2	F18H3.3	yes		WBGene00004083	pph-1	C05A2.1	yes
					WBGene00003980	pes-7	F09C3.1	yes		WBGene00004096	pqm-1	F40F8.7	no
					WBGene00003990	pfn-2	F35C8.6	no		WBGene00004208	ptc-1	ZK675.1	yes
					WBGene00003995	pgp-1	K08E7.9	yes		WBGene00004264	qua-1	T05C12.10	yes
					WBGene00004002	pgp-8	T21E8.3	yes		WBGene00004300	ram-2	F38A3.2	yes
					WBGene00004052	parg-2	H23L24.5	yes		WBGene00004397	rol-6	T01B7.7	yes
					WBGene00004053	tank-1	ZK1005.1	yes		WBGene00004408	rla-0	F25H2.10	yes
					WBGene00004057	pmk-3	F42G8.4	yes		WBGene00004409	rla-1	Y37E3.7	yes
					WBGene00004058	pmp-1	C44B7.8	yes		WBGene00004470	rps-1	F56F3.5	yes
					WBGene00004093	ppw-1	C18E3.7	no		WBGene00004477	rps-8	F42C5.8	yes
					WBGene00004096	pqm-1	F40F8.7	no		WBGene00004749	sdn-1	F57C7.3	yes
					WBGene00004135	pqn-48	K07D4.8	yes		WBGene00004798	sip-1	F43D9.4	yes
					WBGene00004149	trpl-5	T16A1.7	no		WBGene00004827	skr-21	K08H2.1	yes
					WBGene00004172	pqn-92	Y75B8A.27	no		WBGene00004829	sli-1	M02A10.3	yes
					WBGene00004184		T19D2.2	yes		WBGene00004855	sma-1	R31.1	yes
					WBGene00004245	puf-9	W06B11.2	yes		WBGene00004892	sms-1	H21P03.3	yes
					WBGene00004249	pvf-1	Y39A3CL.6	yes		WBGene00004897	snb-1	T10H9.4	yes
					WBGene00004316	rbf-1	F37A4.7	yes		WBGene00004987	spp-2	T08A9.12	no
					WBGene00004321	rcan-1	F54E7.7	yes		WBGene00004994	spp-9	T25C12.2	no
					WBGene00004353	rgs-10	F45B8.2	no		WBGene00005016	sqt-1	B0491.2	yes
					WBGene00004368	ric-19	C32E8.7	yes		WBGene00005648	srp-7	F20D6.4	yes
					WBGene00004393	rnt-1	B0414.2	yes		WBGene00005663	sars-1	C47E12.1	yes
					WBGene00004402	rom-3	Y116A8C.14	yes		WBGene00005764	srw-17	T10H4.6	no
					WBGene00004457	rpm-1	C01B7.6	yes		WBGene00005833	srw-86	C25F9.7	no
					WBGene00004509	rrf-2	M01G12.12	yes		WBGene00006324	sup-17	DY3.7	yes
					WBGene00004735	sbp-1	Y47D3B.7	yes		WBGene00006331	sup-26	R10E4.2	yes
					WBGene00004739	scd-1	H20J18.1	no		WBGene00006372	syx-2	F48F7.2	yes
					WBGene00004796	sid-2	ZK520.2	no		WBGene00006528	tba-1	F26E4.8	yes
					WBGene00004809	skr-3	F44G3.6	yes		WBGene00006539	tbb-6	T04H1.9	yes
					WBGene00004810	skr-4	Y60A3A.18	yes		WBGene00006575	tir-1	F13B10.1	yes
					WBGene00004811	skr-5	F47H4.10	yes		WBGene00006578	tli-1	F25H2.1	yes
					WBGene00004859	sma-5	W06B3.2	yes		WBGene00006649	tth-1	F08F1.8	yes
					WBGene00004900	snf-1	W03G9.1	yes		WBGene00006727	ubq-1	F25B5.4	yes
					WBGene00004986	spp-1	T07C4.4	no		WBGene00006840	unc-116	R05D3.7	yes
					WBGene00004993	spp-8	C28C12.5	yes		WBGene00006966	xtr-2	F17A2.1	no
					WBGene00004995	spp-10	C28C12.7	yes		WBGene00006981	zig-4	C09C7.1	no
					WBGene00004999	spp-14	K09F5.3	no		WBGene00007010	alx-1	R10E12.1	yes
					WBGene00005003	spp-18	F27C8.4	no		WBGene00007114	mttu-1	B0035.16	yes
					WBGene00005582	sri-70	Y61B8B.1	no		WBGene00007406		C07A9.10	no
					WBGene00006063	sto-1	F08C6.4	yes		WBGene00007414		C07E3.3	yes
					WBGene00006212	str-168	Y9C9A.6	no		WBGene00007439		C08E8.3	no
					WBGene00006342	sup-37	C01B7.1	no		WBGene00007440		C08E8.4	no
					WBGene00006351	sur-5	K03A1.5	yes		WBGene00007505	pezo-1	C10C5.1	yes
					WBGene00006464	bath-47	T07H3.1	no		WBGene00007666		C18B12.4	yes
					WBGene00006495	cpna-1	F31D5.3	no		WBGene00007772	egrh-1	C27C12.2	yes
					WBGene00006527	tax-6	C02F4.2	yes		WBGene00007856		C31H5.5	no
					WBGene00006533	tba-7	T28D6.2	yes		WBGene00007864	irg-6	C32H11.1	no
					WBGene00006603	tps-2	F19H8.1	no		WBGene00007873	dod-21	C32H11.10	no
					WBGene00006608	tre-2	T05A12.2	yes		WBGene00007875	dod-24	C32H11.12	no
					WBGene00006609	tre-3	W05E10.4	yes		WBGene00007981	glb-11	C36E8.2	no
					WBGene00006677	twk-24	F55C5.3	yes		WBGene00008152		C47E12.9	no
					WBGene00006683	twk-31	Y47D3B.5	yes		WBGene00008183	rin-1	C48G7.3	yes
					WBGene00006718	ubc-23	C28G1.1	yes		WBGene00008229		C50F4.1	no
					WBGene00006810	unc-78	C04F6.4	yes		WBGene00008252		C51E3.6	yes
					WBGene00006894	ver-1	T17A3.1	yes		WBGene00008389		D1086.2	no
					WBGene00006923	vhp-1	F08B1.1	yes		WBGene00008462		E02H4.4	no
					WBGene00006959	xbp-1	R74.3	yes		WBGene00008518	irld-2	F02C12.4	no
					WBGene00006971	zak-1	R13F6.6	yes		WBGene00008601	mob-2	F09A5.4	yes
					WBGene00006986	zip-1	Y75B8A.35	no		WBGene00008602	oac-14	F09B9.1	no
					WBGene00007010	alx-1	R10E12.1	yes		WBGene00008615		F09C6.1	no
					WBGene00007058	dmd-6	F13G11.1	no		WBGene00008636		F10A3.11	no
					WBGene00007131	pals-26	B0284.1	no		WBGene00008739		F13D12.3	no
					WBGene00007132	pals-27	B0284.2	no		WBGene00008748	yap-1	F13E6.4	yes
					WBGene00007134	pals-28	B0284.4	no		WBGene00008777		F13H10.6	no
					WBGene00007146		B0334.6	yes		WBGene00008863		F15D4.6	no
					WBGene00007181		B0462.1	no		WBGene00008886		F16C3.2	no
					WBGene00007220		C01B9.1	no		WBGene00008891	clec-42	F16H6.1	yes
					WBGene00007297		C04F12.1	no		WBGene00008900		F16H6.10	no
					WBGene00007368		C06B8.2	no		WBGene00008922		F17C11.11	no
					WBGene00007372		C06B8.7	no		WBGene00008975		F20D1.3	no
					WBGene00007392	fbxa-156	C06H5.1	no		WBGene00009032	bgnt-1.3	F21H7.10	yes
					WBGene00007393	fbxa-157	C06H5.2	no		WBGene00009050		F22D6.2	yes
					WBGene00007440		C08E8.4	no		WBGene00009133	bed-3	F25H8.6	no
					WBGene00007453	fbxa-98	C08F11.5	no		WBGene00009164	hrdl-1	F26E4.11	yes
					WBGene00007458	ule-4	C08F11.11	no		WBGene00009223	mdt-28	F28F8.5	no
					WBGene00007465	chil-1	C08H9.4	no		WBGene00009369		F33H2.6	yes
					WBGene00007467	chil-3	C08H9.7	no		WBGene00009380		F34H10.3	no
					WBGene00007469	chil-4	C08H9.10	no		WBGene00009393	clec-62	F35C5.5	no
					WBGene00007470	chil-5	C08H9.11	no		WBGene00009429	irg-5	F35E12.5	no
					WBGene00007471	chil-6	C08H9.12	no		WBGene00009430		F35E12.6	no
					WBGene00007506		C10C5.2	no		WBGene00009431	dct-17	F35E12.7	no
					WBGene00007656	pals-2	C17H1.3	no		WBGene00009435		F35G2.1	yes
					WBGene00007657	pals-3	C17H1.4	no		WBGene00009482		F36G3.1	no
					WBGene00007658	pals-4	C17H1.5	no		WBGene00009500		F36H2.3	yes
					WBGene00007659	pals-5	C17H1.6	no		WBGene00009517	clec-167	F38A1.4	no
					WBGene00007660	pals-6	C17H1.7	no		WBGene00009574		F40E10.6	yes
					WBGene00007661	pals-7	C17H1.8	no		WBGene00009723		F45D3.3	no
					WBGene00007662	pals-8	C17H1.9	no		WBGene00009724		F45D3.4	no
					WBGene00007674		C18D4.4	no		WBGene00009797		F46G10.2	no
					WBGene00007694		C23H4.6	yes		WBGene00009803		F47B8.2	no
					WBGene00007717		C25D7.5	no		WBGene00009886		F49E2.2	no
					WBGene00007725		C25F9.5	no		WBGene00009957		F53B2.8	no
					WBGene00007750	syg-2	C26G2.1	yes		WBGene00010006		F53H2.3	no
					WBGene00007836		C31C9.2	yes		WBGene00010047		F54D1.6	yes
					WBGene00007840		C31C9.6	no		WBGene00010092		F55C5.2	no
					WBGene00007857		C31H5.6	yes		WBGene00010100		F55C9.3	no
					WBGene00007885	ugt-21	C33A12.6	yes		WBGene00010157	oac-34	F56G4.1	no
					WBGene00007913	cyp-36A1	C34B7.3	yes		WBGene00010556	rack-1	K04D7.1	yes
					WBGene00007944		C34F6.10	yes		WBGene00010559		K04D7.6	no
					WBGene00008009	fbxa-171	C38D9.1	no		WBGene00010605		K06G5.1	no
					WBGene00008015	fbxa-174	C38D9.7	no		WBGene00010641	crml-1	K07G5.1	yes
					WBGene00008018	tbc-8	C38H2.1	yes		WBGene00010660		K08D8.6	no
					WBGene00008067		C43D7.4	no		WBGene00010700	nipi-3	K09A9.1	yes
					WBGene00008099		C44H9.4	no		WBGene00010701	ent-2	K09A9.3	yes
					WBGene00008105		C45B11.2	no		WBGene00010731		K10C3.4	yes
					WBGene00008110		C46C2.2	no		WBGene00010740		K10D3.6	no
					WBGene00008194		C49C3.4	no		WBGene00010782		K11H3.5	no
					WBGene00008200		C49C3.10	no		WBGene00010790	sodh-1	K12G11.3	no
					WBGene00008254		C51E3.9	no		WBGene00010821		M01G12.7	no
					WBGene00008265	kcnl-4	C53A5.5	yes		WBGene00010822		M01G12.9	no
					WBGene00008267		C53A5.9	yes		WBGene00010828		M02B1.3	yes
					WBGene00008269		C53A5.11	yes		WBGene00010899		M28.8	no
					WBGene00008296	cdr-2	C54D10.1	yes		WBGene00011060		R06C1.6	no
					WBGene00008301	pals-39	C54D10.7	no		WBGene00011185		R10D12.1	no
					WBGene00008302	pals-38	C54D10.8	no		WBGene00011292	allo-1	R102.5	no
					WBGene00008355	fbxa-141	D1025.3	no		WBGene00011304	mnk-1	R166.5	yes
					WBGene00008372		D1054.5	no		WBGene00011429		T04C12.7	no
					WBGene00008376		D1054.9	no		WBGene00011449		T04H1.2	yes
					WBGene00008394		D1086.7	no		WBGene00011713		T11F9.12	no
					WBGene00008476		E03H4.8	yes		WBGene00011737	sqst-1	T12G3.1	no
					WBGene00008507		F01G10.4	no		WBGene00011833		T19B10.5	yes
					WBGene00008615		F09C6.1	no		WBGene00011844		T19C9.8	no
					WBGene00008671		F11A5.3	no		WBGene00011966		T23G7.3	yes
					WBGene00008698		F11D11.3	no		WBGene00011988	har-2	T24D1.5	no
					WBGene00008709		F11E6.6	no		WBGene00012085		T27D12.1	no
					WBGene00008831		F14H3.12	no		WBGene00012097	abcf-2	T27E9.7	yes
					WBGene00008842	chil-28	F15A4.8	no		WBGene00012117		T28B11.1	no
					WBGene00008850		F15B9.6	no		WBGene00012140		T28F4.5	no
					WBGene00008858	pals-1	F15D3.8	no		WBGene00012216		W02D9.10	no
					WBGene00008862		F15D4.5	no		WBGene00012239		W04A8.4	no
					WBGene00008891	clec-42	F16H6.1	yes		WBGene00012324	rhy-1	W07A12.7	no
					WBGene00008900		F16H6.10	no		WBGene00012364	zmp-4	W09D12.1	no
					WBGene00008945		F19B2.6	no		WBGene00012444		Y15E3A.5	no
					WBGene00009008		F21D5.3	no		WBGene00012471		Y17G7B.20	no
					WBGene00009052	ekl-1	F22D6.6	no		WBGene00012603	nspe-6	Y38E10A.25	no
					WBGene00009058		F22E12.1	yes		WBGene00012634		Y38H6C.23	no
					WBGene00009061	pals-14	F22G12.1	no		WBGene00012664		Y39B6A.1	yes
					WBGene00009077		F23B2.10	no		WBGene00012688		Y39B6A.29	yes
					WBGene00009133	bed-3	F25H8.6	no		WBGene00012757		Y41C4A.11	yes
					WBGene00009162		F26E4.7	yes		WBGene00012782		Y43C5A.2	yes
					WBGene00009166		F26F2.1	no		WBGene00012825		Y43F8C.3	no
					WBGene00009169		F26F2.4	no		WBGene00012833		Y43F8C.11	no
					WBGene00009192	asah-2	F27E5.1	yes		WBGene00012856		Y44A6D.6	no
					WBGene00009237		F28H7.3	no		WBGene00012921		Y46G5A.36	no
					WBGene00009306	maph-1.1	F32A7.5	yes		WBGene00012961		Y47H10A.5	no
					WBGene00009393	clec-62	F35C5.5	no		WBGene00013034	tat-1	Y49E10.11	yes
					WBGene00009394	clec-63	F35C5.6	no		WBGene00013073	hmit-1.1	Y51A2D.4	yes
					WBGene00009432	cld-9	F35E12.8	no		WBGene00013458		Y67A10A.9	no
					WBGene00009482		F36G3.1	no		WBGene00013754	fbxa-116	Y113G7B.1	no
					WBGene00009515	clec-170	F38A1.1	no		WBGene00013898		ZC443.3	no
					WBGene00009518	clec-166	F38A1.5	no		WBGene00014013		ZK632.4	yes
					WBGene00009523	clec-165	F38A1.10	no		WBGene00014046	clec-60	ZK666.6	no
					WBGene00009531		F38B2.4	yes		WBGene00014171	nep-26	ZK970.1	yes
					WBGene00009595		F40F12.7	yes		WBGene00014173		ZK970.7	no
					WBGene00009675		F44A6.3	no		WBGene00015159	psd-1	B0361.5	yes
					WBGene00009803		F47B8.2	no		WBGene00015167		B0403.3	no
					WBGene00009835		F47H4.2	no		WBGene00015182		B0416.7	no
					WBGene00009839	fbxa-188	F47H4.8	no		WBGene00015251		B0546.4	yes
					WBGene00009840	fbxa-189	F47H4.9	no		WBGene00015278		C01B10.3	yes
					WBGene00009859	clec-33	F49A5.7	yes		WBGene00015280		C01B10.6	no
					WBGene00009895	scl-2	F49E11.10	yes		WBGene00015335	acdh-6	C02D5.1	no
					WBGene00009898	dod-23	F49E12.2	no		WBGene00015350	fbxl-1	C02F5.7	yes
					WBGene00009908		F49H6.5	yes		WBGene00015510	erp-44.2	C06A6.5	yes
					WBGene00009940	strl-1	F52F12.7	yes		WBGene00015561		C07A12.7	yes
					WBGene00009943		F52G2.3	no		WBGene00015601	fbxa-166	C08E3.9	no
					WBGene00009971		F53C11.1	no		WBGene00015602	fbxa-158	C08E3.10	no
					WBGene00010004		F53H2.1	no		WBGene00015762		C14C6.8	no
					WBGene00010049		F54D5.3	no		WBGene00015776	dct-1	C14F5.1	yes
					WBGene00010085		F55B11.3	no		WBGene00015955		C18B2.4	yes
					WBGene00010134		F55H12.3	yes		WBGene00016040		C24A11.1	no
					WBGene00010150		F56D5.6	no		WBGene00016064	acd-1	C24G7.2	yes
					WBGene00010204		F57F5.1	yes		WBGene00016406		C34D10.1	yes
					WBGene00010206		F57G4.1	no		WBGene00016407		C34D10.2	yes
					WBGene00010275	acc-1	F58G6.4	yes		WBGene00016489	fubl-3	C36E6.1	yes
					WBGene00010296	dgat-2	F59A1.10	yes		WBGene00016507	abhd-5.2	C37H5.3	yes
					WBGene00010357		H03A11.2	no		WBGene00016579	sre-14	C42C1.1	no
					WBGene00010491		K02B7.3	no		WBGene00016769		C49C8.5	yes
					WBGene00010507		K02E2.6	no		WBGene00016845		C50F7.5	yes
					WBGene00010508		K02E2.7	no		WBGene00016862		C52A10.1	no
					WBGene00010545	cbp-2	K03H1.10	yes		WBGene00016968	epg-5	C56C10.12	yes
					WBGene00010585		K05C4.9	no		WBGene00016997	cebp-1	D1005.3	yes
					WBGene00010593	gsnl-1	K06A4.3	yes		WBGene00017016	snap-1	D1014.3	yes
					WBGene00010605		K06G5.1	no		WBGene00017028	dex-1	D1044.2	yes
					WBGene00010644		K07G5.5	no		WBGene00017045	atg-13	D2007.5	yes
					WBGene00010657		K08D8.3	no		WBGene00017142		EEED8.14	no
					WBGene00010660		K08D8.6	no		WBGene00017322	clec-160	F09G8.8	no
					WBGene00010700	nipi-3	K09A9.1	yes		WBGene00017396		F12A10.7	no
					WBGene00010724		K09E9.1	no		WBGene00017434		F13H8.1	no
					WBGene00010750		K10D11.6	no		WBGene00017447		F14B8.5	no
					WBGene00010821		M01G12.7	no		WBGene00017467		F14F9.4	no
					WBGene00010822		M01G12.9	no		WBGene00017506		F16B4.4	no
					WBGene00010850		M04C3.1	no		WBGene00017563		F18C5.10	no
					WBGene00010877	lact-4	M05D6.4	no		WBGene00017571	jmjd-3.1	F18E9.5	yes
					WBGene00010897	lact-3	M28.6	no		WBGene00017660		F21C10.11	no
					WBGene00010901		M28.10	no		WBGene00017705		F22E5.6	yes
					WBGene00010904	ugt-62	M88.1	yes		WBGene00017804		F26A1.6	no
					WBGene00010953	clec-190	M199.4	no		WBGene00017834		F26F12.3	no
					WBGene00010998		R03G8.3	no		WBGene00017979		F32B5.6	no
					WBGene00011076	scav-5	R07B1.3	yes		WBGene00018011		F33E11.3	yes
					WBGene00011161	chil-18	R09D1.5	no		WBGene00018145		F37C4.5	no
					WBGene00011162	chil-19	R09D1.6	no		WBGene00018268		F41C3.2	no
					WBGene00011168		R09D1.12	yes		WBGene00018294	atg-18	F41E6.13	yes
					WBGene00011207		R10E8.1	no		WBGene00018345		F42C5.3	no
					WBGene00011212		R10E8.6	no		WBGene00018418		F44E2.4	no
					WBGene00011335		T01E8.8	no		WBGene00018564		F47D12.9	yes
					WBGene00011361	lyst-1	T01H10.8	yes		WBGene00018702		F52E4.5	no
					WBGene00011399		T03F6.3	yes		WBGene00018731		F53A9.8	no
					WBGene00011423	ipla-7	T04B2.5	yes		WBGene00018738	swip-10	F53B1.6	yes
					WBGene00011474	aldo-1	T05D4.1	yes		WBGene00018850	gpx-8	F55A3.5	no
					WBGene00011486		T05E12.3	yes		WBGene00018953		F56C9.10	yes
					WBGene00011539	fbxa-135	T06E6.5	no		WBGene00019006	spg-20	F57B10.9	yes
					WBGene00011564	ugt-50	T07C5.1	yes		WBGene00019146		H02F09.3	yes
					WBGene00011737	sqst-1	T12G3.1	no		WBGene00019273		H43E16.1	yes
					WBGene00011762		T13H10.2	no		WBGene00019298		K02D7.1	yes
					WBGene00011767	agxt-1	T14D7.1	yes		WBGene00019400		K04G7.1	no
					WBGene00011800		T16G1.6	no		WBGene00019405		K05F1.1	no
					WBGene00011821	cdf-2	T18D3.3	yes		WBGene00019411		K05F1.10	no
					WBGene00011844		T19C9.8	no		WBGene00019449		K06H6.1	no
					WBGene00011848	chil-27	T19H5.3	no		WBGene00019466	tos-1	K07B1.6	no
					WBGene00011852	clec-26	T20B3.12	yes		WBGene00019686		K12H6.6	yes
					WBGene00011880		T21B6.3	yes		WBGene00019719		M01H9.3	no
					WBGene00011893		T21C9.6	no		WBGene00019748	atg-2	M03A8.2	yes
					WBGene00011932	sptl-3	T22G5.5	yes		WBGene00019780		M60.4	no
					WBGene00011938	alh-13	T22H6.2	yes		WBGene00019782		M60.7	yes
					WBGene00012091	pals-29	T27E7.6	no		WBGene00019823	fnta-1	R02D3.5	yes
					WBGene00012093		T27E7.9	no		WBGene00019831		R02F2.1	yes
					WBGene00012121		T28C6.7	yes		WBGene00019844	abts-4	R03E9.3	yes
					WBGene00012130	slc-17.4	T28F3.4	no		WBGene00019895	aagr-2	R05F9.12	yes
					WBGene00012131		T28F3.5	yes		WBGene00019902		R05G6.10	yes
					WBGene00012134		T28F3.8	no		WBGene00019946	chat-1	R08C7.2	yes
					WBGene00012144		T28H10.3	yes		WBGene00019957		R08E3.1	no
					WBGene00012226		W03G11.4	no		WBGene00020143		T01C8.2	no
					WBGene00012251	clec-49	W04E12.6	yes		WBGene00020148		T01D1.3	no
					WBGene00012253	clec-50	W04E12.8	yes		WBGene00020339	ttr-59	T08A9.11	no
					WBGene00012323	oac-54	W07A12.6	no		WBGene00020361	fbxc-19	T08E11.5	no
					WBGene00012381		Y2H9A.4	no		WBGene00020456	fbxa-60	T12B5.10	no
					WBGene00012398		Y6E2A.4	no		WBGene00020472	lips-11	T13B5.5	no
					WBGene00012399		Y6E2A.5	no		WBGene00020481		T13C2.6	yes
					WBGene00012400		Y6E2A.7	no		WBGene00020710		T23B3.2	no
					WBGene00012452		Y17D7B.4	no		WBGene00020725	cnp-3	T23C6.3	no
					WBGene00012464	arrd-7	Y17G7B.11	yes		WBGene00020774		T24E12.5	no
					WBGene00012529		Y32F6A.4	no		WBGene00020784	tat-4	T24H7.5	yes
					WBGene00012722		Y39G8B.1	yes		WBGene00020854		T27C4.1	no
					WBGene00012726		Y39G8B.5	yes		WBGene00020943		W02D7.8	no
					WBGene00012757		Y41C4A.11	yes		WBGene00020981		W03D2.6	no
					WBGene00012782		Y43C5A.2	yes		WBGene00021048		W05H9.1	no
					WBGene00012824		Y43F8B.14	no		WBGene00021050		W05H9.3	no
					WBGene00012891	sorb-1	Y45F10D.13	yes		WBGene00021121		W09G12.7	yes
					WBGene00012910		Y46G5A.20	no		WBGene00021336		Y34F4.1	no
					WBGene00012961		Y47H10A.5	no		WBGene00021446	hlh-33	Y39A3CR.6	no
					WBGene00013009	fbxc-23	Y48E1B.11	no		WBGene00021469		Y39G10AR.11	yes
					WBGene00013019		Y48G10A.2	no		WBGene00021475	tbca-1	Y39G10AR.20	yes
					WBGene00013037		Y49E10.18	no		WBGene00021529		Y41G9A.5	no
					WBGene00013042	cccp-1	Y49E10.23	yes		WBGene00021556		Y45G5AM.3	no
					WBGene00013180	cutl-10	Y53H1B.1	no		WBGene00021580	clec-174	Y46C8AL.2	no
					WBGene00013181		Y53H1B.2	no		WBGene00021627		Y47D7A.15	no
					WBGene00013215		Y54G11A.4	yes		WBGene00021869	vrp-1	Y54G2A.3	no
					WBGene00013216		Y54G11A.7	yes		WBGene00021873	clec-82	Y54G2A.8	no
					WBGene00013275	btb-14	Y57A10B.3	no		WBGene00021876		Y54G2A.11	no
					WBGene00013294	pals-30	Y57G11B.1	no		WBGene00021883		Y54G2A.18	yes
					WBGene00013379		Y62E10A.13	yes		WBGene00021927	abhd-14	Y55F3AM.10	yes
					WBGene00013439		Y66D12A.13	no		WBGene00021964		Y57E12B.4	no
					WBGene00013481		Y69H2.3	no		WBGene00021977		Y58A7A.3	no
					WBGene00013492		Y70C5C.1	yes		WBGene00022078	epg-9	Y69A2AR.7	yes
					WBGene00013620	fbxa-111	Y102A5C.14	no		WBGene00022156		Y71G12B.18	no
					WBGene00013636		Y105C5A.12	no		WBGene00022425	plst-1	Y104H12BR.1	yes
					WBGene00013701		Y106G6D.4	no		WBGene00022499	set-30	ZC8.3	yes
					WBGene00013754	fbxa-116	Y113G7B.1	no		WBGene00022562		ZC204.12	no
					WBGene00013836	fbxa-29	ZC47.3	no		WBGene00022570	sdz-35	ZC239.12	yes
					WBGene00013837	fbxa-30	ZC47.4	no		WBGene00022644	dod-19	ZK6.10	no
					WBGene00013845	fbxa-37	ZC47.14	no		WBGene00022758		ZK488.6	no
					WBGene00013847	cls-3	ZC84.3	yes		WBGene00022797	best-24	ZK688.2	yes
					WBGene00013855		ZC116.3	yes		WBGene00022848		ZK1055.7	no
					WBGene00013869	mlck-1	ZC373.4	yes		WBGene00044213		Y102A5C.36	no
					WBGene00014001	pyk-2	ZK593.1	yes		WBGene00044284	spp-21	T25C12.4	no
					WBGene00014046	clec-60	ZK666.6	no		WBGene00044347		Y71G12B.30	no
					WBGene00014132		ZK896.1	no		WBGene00044487		Y54G2A.44	no
					WBGene00014137	clec-187	ZK896.6	yes		WBGene00044687		B0563.9	no
					WBGene00014141		ZK899.2	no		WBGene00044724		R02E4.3	no
					WBGene00014162	chil-9	ZK938.6	no		WBGene00044901		Y41G9A.10	no
					WBGene00014164	lact-2	ZK945.1	no		WBGene00045272		F59C12.4	no
					WBGene00014215	obr-3	ZK1086.1	yes		WBGene00045411		C25F9.11	no
					WBGene00014252		ZK1320.2	no		WBGene00045416		Y37H2A.14	no
					WBGene00015050	clec-51	B0218.6	yes		WBGene00045457		F33H12.7	no
					WBGene00015107	viro-2	B0280.13	no		WBGene00077669		Y38H6A.5	no
					WBGene00015223		B0507.6	no		WBGene00194717		ZC239.22	no
					WBGene00015224		B0507.7	no
					WBGene00015225		B0507.8	no
					WBGene00015226		B0507.9	no
					WBGene00015227	ddn-1	B0507.10	no
					WBGene00015280		C01B10.6	no
					WBGene00015356	tag-278	C02F12.7	yes
					WBGene00015362	fbxa-105	C02H6.2	no
					WBGene00015403	clec-10	C03H5.1	yes
					WBGene00015469		C05D2.8	no
					WBGene00015537		C06E4.8	no
					WBGene00015540	sams-4	C06E7.3	yes
					WBGene00015559	npr-17	C06G4.5	yes
					WBGene00015574	irg-1	C07G3.2	no
					WBGene00015593		C08E3.1	no
					WBGene00015600	fbxa-165	C08E3.8	no
					WBGene00015601	fbxa-166	C08E3.9	no
					WBGene00015602	fbxa-158	C08E3.10	no
					WBGene00015605		C08E3.13	no
					WBGene00015608	math-3	C08F1.4	no
					WBGene00015609	math-4	C08F1.5	no
					WBGene00015632		C09D4.1	yes
					WBGene00015713		C12D12.1	no
					WBGene00015728		C13A10.1	no
					WBGene00015752		C14B9.2	yes
					WBGene00015756		C14C6.2	no
					WBGene00015793		C15C7.7	yes
					WBGene00015828	math-14	C16C4.4	no
					WBGene00015829	math-15	C16C4.5	no
					WBGene00015832	math-16	C16C4.8	no
					WBGene00015834	math-5	C16C4.10	no
					WBGene00015835	math-6	C16C4.11	no
					WBGene00015839	math-10	C16C4.15	no
					WBGene00015913		C17F4.7	no
					WBGene00015949		C18A11.3	no
					WBGene00015955		C18B2.4	yes
					WBGene00015965	ugt-48	C18C4.3	yes
					WBGene00015968		C18C4.7	no
					WBGene00016004		C18H9.6	no
					WBGene00016022		C23H3.9	yes
					WBGene00016027		C23H5.8	no
					WBGene00016030		C24A1.3	yes
					WBGene00016188	sec-15	C28G1.3	yes
					WBGene00016190		C28G1.5	yes
					WBGene00016216	pals-22	C29F9.1	no
					WBGene00016218	pals-23	C29F9.3	no
					WBGene00016219	pals-24	C29F9.4	no
					WBGene00016281	pals-32	C31B8.4	no
					WBGene00016314		C32D5.6	yes
					WBGene00016330		C32E12.4	no
					WBGene00016415	ampd-1	C34F11.3	yes
					WBGene00016424		C34H4.1	no
					WBGene00016434		C35B1.4	no
					WBGene00016507	abhd-5.2	C37H5.3	yes
					WBGene00016511		C37H5.13	yes
					WBGene00016539	madd-2	C39F7.2	yes
					WBGene00016555	math-20	C40D2.2	no
					WBGene00016585	oac-59	C42C1.7	no
					WBGene00016639		C44B12.6	no
					WBGene00016646	fbxc-5	C44C8.1	no
					WBGene00016647	fbxc-4	C44C8.2	no
					WBGene00016648	fbxc-2	C44C8.3	no
					WBGene00016649	fbxc-1	C44C8.4	no
					WBGene00016663		C45E1.4	no
					WBGene00016719	math-24	C46F9.3	no
					WBGene00016735	fhod-1	C46H11.11	yes
					WBGene00016760		C49A9.6	no
					WBGene00016763		C49A9.9	no
					WBGene00016766		C49C8.2	no
					WBGene00016783	irg-2	C49G7.5	no
					WBGene00016788		C49G7.10	no
					WBGene00016862		C52A10.1	no
					WBGene00016883		C52E2.4	no
					WBGene00016912	clec-86	C54D1.2	yes
					WBGene00016920		C54E4.5	yes
					WBGene00016939		C55B6.1	yes
					WBGene00016974	lron-15	C56E6.6	yes
					WBGene00016997	cebp-1	D1005.3	yes
					WBGene00017060		D2063.1	no
					WBGene00017080	lec-12	DC2.3	yes
					WBGene00017082		DC2.5	yes
					WBGene00017103	klo-2	E02H9.5	yes
					WBGene00017127		E04F6.8	no
					WBGene00017163	dnpp-1	F01F1.9	yes
					WBGene00017195	glo-4	F07C3.4	yes
					WBGene00017214		F07E5.9	no
					WBGene00017241	pcyt-1	F08C6.2	yes
					WBGene00017244	apy-1	F08C6.6	yes
					WBGene00017302		F09F7.5	no
					WBGene00017322	clec-160	F09G8.8	no
					WBGene00017362		F10G2.1	no
					WBGene00017369		F10G7.5	yes
					WBGene00017373		F10G7.10	yes
					WBGene00017398	slc-17.6	F12B6.2	no
					WBGene00017415		F13A2.6	no
					WBGene00017428		F13D11.3	yes
					WBGene00017467		F14F9.4	no
					WBGene00017475		F14H12.8	no
					WBGene00017591		F19C7.1	no
					WBGene00017592		F19C7.2	yes
					WBGene00017687	ets-4	F22A3.1	yes
					WBGene00017705		F22E5.6	yes
					WBGene00017706		F22E5.7	no
					WBGene00017726		F22H10.2	no
					WBGene00017819		F26D11.2	no
					WBGene00017866	stn-2	F27D9.8	yes
					WBGene00017948	mth-1	F31D5.5	yes
					WBGene00017969		F32A5.3	yes
					WBGene00018100	math-26	F36H5.1	no
					WBGene00018101	math-27	F36H5.2	no
					WBGene00018195	btb-16	F39E9.2	no
					WBGene00018237	irg-7	F40F4.6	no
					WBGene00018249		F40H3.1	no
					WBGene00018342		F42A10.6	no
					WBGene00018345		F42C5.3	no
					WBGene00018346		F42C5.4	no
					WBGene00018351		F42G2.2	no
					WBGene00018352	fbxc-20	F42G2.3	no
					WBGene00018353	fbxa-182	F42G2.4	no
					WBGene00018354		F42G2.5	yes
					WBGene00018488	acs-1	F46E10.1	yes
					WBGene00018579	acs-16	F47G6.2	no
					WBGene00018614	pals-31	F48G7.2	no
					WBGene00018616		F48G7.5	no
					WBGene00018621		F48G7.10	no
					WBGene00018645		F49F1.5	no
					WBGene00018696	pho-6	F52E1.8	yes
					WBGene00018763		F53F10.1	yes
					WBGene00018764		F53F10.2	yes
					WBGene00018823		F54E2.1	no
					WBGene00018903		F55G1.7	no
					WBGene00018966		F56D2.5	yes
					WBGene00018997		F57B9.3	yes
					WBGene00019018	abts-3	F57F10.1	yes
					WBGene00019047		F58E2.3	no
					WBGene00019057		F58F9.3	no
					WBGene00019068	faah-3	F58H7.2	yes
					WBGene00019097		F59B1.2	no
					WBGene00019146		H02F09.3	yes
					WBGene00019249		H28G03.1	yes
					WBGene00019261		H34I24.2	no
					WBGene00019273		H43E16.1	yes
					WBGene00019314		K02E7.10	yes
					WBGene00019327	zip-2	K02F3.4	no
					WBGene00019349	trx-5	K02H11.6	yes
					WBGene00019411		K05F1.10	no
					WBGene00019421		K05F6.10	no
					WBGene00019435		K06A9.1	no
					WBGene00019490		K07E3.1	no
					WBGene00019515	ugt-19	K08B4.3	yes
					WBGene00019532		K08D10.9	no
					WBGene00019579	oac-57	K09E10.1	no
					WBGene00019589		K09F6.6	no
					WBGene00019590		K09F6.7	yes
					WBGene00019592		K09F6.9	yes
					WBGene00019593		K09F6.10	no
					WBGene00019615		K10B4.3	yes
					WBGene00019699	math-34	M01D1.2	no
					WBGene00019743	nhr-203	M02H5.5	no
					WBGene00019813	ger-1	R01H2.5	yes
					WBGene00019832	osg-1	R02F2.2	yes
					WBGene00019843		R03E9.2	no
					WBGene00019869	cnnm-2	R04E5.2	yes
					WBGene00019895	aagr-2	R05F9.12	yes
					WBGene00019914	clec-150	R06B10.3	no
					WBGene00019917	clec-43	R07C3.1	yes
					WBGene00019928	clec-44	R07C3.12	yes
					WBGene00019931		R07C12.1	no
					WBGene00019932		R07C12.2	no
					WBGene00019967	cyp-33C8	R08F11.3	yes
					WBGene00019973		R09A1.3	no
					WBGene00019986		R09F10.1	yes
					WBGene00020004		R11E3.2	yes
					WBGene00020015	nhr-210	R11G11.12	no
					WBGene00020135	aakg-4	T01B6.3	no
					WBGene00020158		T02C5.1	no
					WBGene00020227		T05A8.1	no
					WBGene00020228		T05A8.2	no
					WBGene00020237	phat-4	T05B4.3	no
					WBGene00020251	camt-1	T05C1.4	yes
					WBGene00020326	math-38	T07H3.3	no
					WBGene00020357		T08E11.1	no
					WBGene00020364		T08E11.8	no
					WBGene00020448	fbxa-51	T12B5.1	no
					WBGene00020449	fbxa-54	T12B5.2	no
					WBGene00020451	fbxa-11	T12B5.4	no
					WBGene00020453	fbxa-55	T12B5.6	no
					WBGene00020455	fbxa-59	T12B5.8	no
					WBGene00020456	fbxa-60	T12B5.10	no
					WBGene00020457	fbxa-67	T12B5.11	no
					WBGene00020471	pho-14	T13B5.3	yes
					WBGene00020486		T13C5.6	yes
					WBGene00020546		T17A3.10	no
					WBGene00020577		T19D12.2	no
					WBGene00020613		T20D4.7	yes
					WBGene00020637	fbxa-7	T20H9.1	no
					WBGene00020639	fbxa-71	T20H9.3	no
					WBGene00020662		T21H3.1	no
					WBGene00020672		T22B7.3	no
					WBGene00020678		T22B11.4	no
					WBGene00020774		T24E12.5	no
					WBGene00020784	tat-4	T24H7.5	yes
					WBGene00020838	trak-1	T27A3.1	yes
					WBGene00020869		T28A11.2	no
					WBGene00020875		T28A11.13	yes
					WBGene00020886	ttr-6	T28B4.3	no
					WBGene00020895	plpp-1.2	T28D9.3	yes
					WBGene00020952	kel-8	W02G9.2	yes
					WBGene00020972	trpl-2	W03B1.2	no
					WBGene00020981		W03D2.6	no
					WBGene00020989		W03D8.8	yes
					WBGene00021020		W04B5.3	no
					WBGene00021036		W05F2.4	no
					WBGene00021043	pck-1	W05G11.6	yes
					WBGene00021070	cpr-8	W07B8.1	yes
					WBGene00021081	pals-33	W08A12.4	no
					WBGene00021111		W09C3.3	no
					WBGene00021122		W09G12.8	no
					WBGene00021176		Y9C9A.1	yes
					WBGene00021179	fbxa-86	Y9C9A.12	no
					WBGene00021197		Y17G9A.4	no
					WBGene00021256		Y22D7AR.2	no
					WBGene00021275	dmsr-2	Y23H5B.4	no
					WBGene00021322		Y34B4A.6	no
					WBGene00021335	spp-23	Y34D9A.11	no
					WBGene00021336		Y34F4.1	no
					WBGene00021339		Y34F4.4	no
					WBGene00021340		Y34F4.5	no
					WBGene00021371	nape-1	Y37E11AR.4	yes
					WBGene00021397		Y38C1AA.6	no
					WBGene00021404	trpl-3	Y38C1AB.2	no
					WBGene00021408	trpl-4	Y38C1AB.6	no
					WBGene00021556		Y45G5AM.3	no
					WBGene00021602	clec-205	Y46H3B.1	no
					WBGene00021654		Y47G7B.2	no
					WBGene00021709	ugt-29	Y49C4A.8	yes
					WBGene00021731		Y49G5A.1	no
					WBGene00021743		Y50D4B.4	no
					WBGene00021745		Y50D4B.6	yes
					WBGene00021779		Y51H7C.1	no
					WBGene00021792		Y52D5A.1	no
					WBGene00021834	mab-31	Y54E10A.16	no
					WBGene00021873	clec-82	Y54G2A.8	no
					WBGene00021977		Y58A7A.3	no
					WBGene00021979		Y58A7A.5	no
					WBGene00021983	npr-5	Y58G8A.4	yes
					WBGene00022083		Y69A2AR.12	no
					WBGene00022096		Y69A2AR.25	no
					WBGene00022175		Y71H2AM.10	yes
					WBGene00022189		Y71H2AR.2	yes
					WBGene00022201		Y71H10B.1	yes
					WBGene00022276	nlp-40	Y74C9A.2	no
					WBGene00022281	abtm-1	Y74C10AR.3	yes
					WBGene00022329	fbxa-79	Y82E9BL.13	no
					WBGene00022375		Y94H6A.2	no
					WBGene00022440		Y110A2AL.3	no
					WBGene00022476	fbxa-75	Y119D3A.1	no
					WBGene00022485	fbxa-63	Y119D3B.7	no
					WBGene00022486	fbxa-61	Y119D3B.8	no
					WBGene00022490		Y119D3B.13	no
					WBGene00022497		Y119D3B.21	no
					WBGene00022499	set-30	ZC8.3	yes
					WBGene00022545		ZC196.1	no
					WBGene00022546		ZC196.2	no
					WBGene00022547		ZC196.3	no
					WBGene00022548		ZC196.4	no
					WBGene00022549		ZC196.5	no
					WBGene00022550	droe-8	ZC196.6	no
					WBGene00022569		ZC239.6	yes
					WBGene00022570	sdz-35	ZC239.12	yes
					WBGene00022572		ZC239.14	yes
					WBGene00022593		ZC328.3	yes
					WBGene00022610	ltah-1.2	ZC416.6	yes
					WBGene00022615		ZC449.5	yes
					WBGene00022653		ZK105.1	no
					WBGene00022690	math-49	ZK250.7	no
					WBGene00022745		ZK470.2	no
					WBGene00022801	pcp-5	ZK688.6	yes
					WBGene00022824		ZK813.5	no
					WBGene00022847		ZK1055.6	no
					WBGene00022848		ZK1055.7	no
					WBGene00023417	swm-1	C25E10.9	no
					WBGene00023432		K12B6.9	no
					WBGene00023483		Y75B8A.39	no
					WBGene00043062	clec-80	Y54G2A.39	no
					WBGene00044014		F15H10.10	no
					WBGene00044151		W04G3.12	no
					WBGene00044182		F09C6.12	no
					WBGene00044183		F09C6.13	no
					WBGene00044206		T26H5.9	no
					WBGene00044207		Y6G8.5	no
					WBGene00044212		Y68A4A.13	no
					WBGene00044237	pals-9	C17H1.10	no
					WBGene00044302		F28E10.5	yes
					WBGene00044332	clec-36	T20B3.16	yes
					WBGene00044379		F40H7.12	no
					WBGene00044427		F56A6.5	no
					WBGene00044469	clec-173	T26C12.6	no
					WBGene00044489	pudl-1	Y54G2A.46	no
					WBGene00044527		Y39H10B.2	no
					WBGene00044607		K02A11.4	no
					WBGene00044644		B0205.13	no
					WBGene00044663		F26G1.10	no
					WBGene00044675	fbxa-76	Y119D3B.22	no
					WBGene00044696		F52E1.14	no
					WBGene00044707	pals-15	F22G12.7	no
					WBGene00044708	pals-11	C17H1.13	no
					WBGene00044709	pals-12	C17H1.14	no
					WBGene00044760		Y71H2AM.25	yes
					WBGene00044783		T26H5.10	no
					WBGene00044787	pals-36	C54D10.12	no
					WBGene00044998		M199.9	no
					WBGene00045038	ule-2	F13G11.3	no
					WBGene00045268	ttr-42	H01M10.3	no
					WBGene00045338		M01B2.13	yes
					WBGene00045393		F26D11.13	no
					WBGene00045394		ZK813.7	no
					WBGene00045401	eol-1	T26F2.3	no
					WBGene00045416		Y37H2A.14	no
					WBGene00045475		T07A5.7	no
					WBGene00050899		T10C6.15	no
					WBGene00077593		C49G7.12	no
					WBGene00077770		M04D5.3	no
					WBGene00086568		Y2H9A.6	no
					WBGene00138721	pals-37	C54D10.14	no
					WBGene00194645		Y105C5A.1269	no
					WBGene00194646		Y105C5A.1270	no
					WBGene00194651		C33D9.13	no
					WBGene00194695		B0462.5	no
					WBGene00194717		ZC239.22	no
					WBGene00194902		Y39H10B.3	no
					WBGene00195165		F57G4.11	no
					WBGene00202499		B0507.15	no
					WBGene00219216		K08D10.14	no
					WBGene00219316		F21A3.11	yes

## Sheet: IPR genes
S8 Table - Ortholist results of: IPR genes; genes up in both pals-22/N2 and pals-22/pals-25 comparisons; and genes regulated by hsf-1*.
All gene lists use WS263 annotation
WormBase_ID	Common_Name	Locus_ID	Ensembl_ID	HGNC_Symbol	No. of Matched Databases	Matched_Databases		UNIQUE GENES
WBGene00001885	his-11	ZK131.5	ENSG00000101812	H2BFM	1	Ensembl Compara 87-89		WBGene00001885
WBGene00001889	his-15	ZK131.9	ENSG00000101812	H2BFM	1	Ensembl Compara 87-89		WBGene00001889
WBGene00001918	his-44	F08G2.1	ENSG00000101812	H2BFM	1	Ensembl Compara 87-89		WBGene00001918
WBGene00001885	his-11	ZK131.5	ENSG00000123569	H2BFWT	1	Ensembl Compara 87-89		WBGene00002021
WBGene00001889	his-15	ZK131.9	ENSG00000123569	H2BFWT	1	Ensembl Compara 87-89		WBGene00018997
WBGene00001918	his-44	F08G2.1	ENSG00000123569	H2BFWT	1	Ensembl Compara 87-89		WBGene00012726
WBGene00001885	his-11	ZK131.5	ENSG00000124635	HIST1H2BJ	5	Ensembl Compara 87-89|Homologene|InParanoid|OrthoInspector|OrthoMCL		WBGene00004002
WBGene00001889	his-15	ZK131.9	ENSG00000124635	HIST1H2BJ	6	Ensembl Compara 87-89|Homologene|InParanoid|OMA|OrthoInspector|OrthoMCL		WBGene00004810
WBGene00001918	his-44	F08G2.1	ENSG00000124635	HIST1H2BJ	5	Ensembl Compara 87-89|Homologene|InParanoid|OrthoInspector|OrthoMCL		WBGene00004811
WBGene00001885	his-11	ZK131.5	ENSG00000146047	HIST1H2BA	4	Ensembl Compara 87-89|InParanoid|OrthoInspector|OrthoMCL		WBGene00008267
WBGene00001889	his-15	ZK131.9	ENSG00000146047	HIST1H2BA	5	Ensembl Compara 87-89|InParanoid|OMA|OrthoInspector|OrthoMCL		WBGene00008269
WBGene00001918	his-44	F08G2.1	ENSG00000146047	HIST1H2BA	4	Ensembl Compara 87-89|InParanoid|OrthoInspector|OrthoMCL		WBGene00009908
WBGene00001885	his-11	ZK131.5	ENSG00000158373	HIST1H2BD	4	Ensembl Compara 87-89|InParanoid|OrthoInspector|OrthoMCL		WBGene00016912
WBGene00001889	his-15	ZK131.9	ENSG00000158373	HIST1H2BD	5	Ensembl Compara 87-89|InParanoid|OMA|OrthoInspector|OrthoMCL		WBGene00012757
WBGene00001918	his-44	F08G2.1	ENSG00000158373	HIST1H2BD	4	Ensembl Compara 87-89|InParanoid|OrthoInspector|OrthoMCL
WBGene00001885	his-11	ZK131.5	ENSG00000180596	HIST1H2BC	4	Ensembl Compara 87-89|InParanoid|OrthoInspector|OrthoMCL
WBGene00001889	his-15	ZK131.9	ENSG00000180596	HIST1H2BC	4	Ensembl Compara 87-89|InParanoid|OrthoInspector|OrthoMCL
WBGene00001918	his-44	F08G2.1	ENSG00000180596	HIST1H2BC	4	Ensembl Compara 87-89|InParanoid|OrthoInspector|OrthoMCL
WBGene00001885	his-11	ZK131.5	ENSG00000184678	HIST2H2BE	4	Ensembl Compara 87-89|InParanoid|OrthoInspector|OrthoMCL
WBGene00001889	his-15	ZK131.9	ENSG00000184678	HIST2H2BE	5	Ensembl Compara 87-89|InParanoid|OMA|OrthoInspector|OrthoMCL
WBGene00001918	his-44	F08G2.1	ENSG00000184678	HIST2H2BE	4	Ensembl Compara 87-89|InParanoid|OrthoInspector|OrthoMCL
WBGene00001885	his-11	ZK131.5	ENSG00000185130	HIST1H2BL	4	Ensembl Compara 87-89|InParanoid|OrthoInspector|OrthoMCL
WBGene00001889	his-15	ZK131.9	ENSG00000185130	HIST1H2BL	5	Ensembl Compara 87-89|InParanoid|OMA|OrthoInspector|OrthoMCL
WBGene00001918	his-44	F08G2.1	ENSG00000185130	HIST1H2BL	4	Ensembl Compara 87-89|InParanoid|OrthoInspector|OrthoMCL
WBGene00001885	his-11	ZK131.5	ENSG00000196890	HIST3H2BB	4	Ensembl Compara 87-89|InParanoid|OrthoInspector|OrthoMCL
WBGene00001889	his-15	ZK131.9	ENSG00000196890	HIST3H2BB	5	Ensembl Compara 87-89|InParanoid|OMA|OrthoInspector|OrthoMCL
WBGene00001918	his-44	F08G2.1	ENSG00000196890	HIST3H2BB	4	Ensembl Compara 87-89|InParanoid|OrthoInspector|OrthoMCL
WBGene00001885	his-11	ZK131.5	ENSG00000197903	HIST1H2BK	4	Ensembl Compara 87-89|InParanoid|OrthoInspector|OrthoMCL
WBGene00001889	his-15	ZK131.9	ENSG00000197903	HIST1H2BK	5	Ensembl Compara 87-89|InParanoid|OMA|OrthoInspector|OrthoMCL
WBGene00001918	his-44	F08G2.1	ENSG00000197903	HIST1H2BK	4	Ensembl Compara 87-89|InParanoid|OrthoInspector|OrthoMCL
WBGene00001885	his-11	ZK131.5	ENSG00000233822	HIST1H2BN	4	Ensembl Compara 87-89|InParanoid|OrthoInspector|OrthoMCL
WBGene00001889	his-15	ZK131.9	ENSG00000233822	HIST1H2BN	4	Ensembl Compara 87-89|InParanoid|OrthoInspector|OrthoMCL
WBGene00001918	his-44	F08G2.1	ENSG00000233822	HIST1H2BN	4	Ensembl Compara 87-89|InParanoid|OrthoInspector|OrthoMCL
WBGene00001885	his-11	ZK131.5	ENSG00000234289	H2BFS	2	Ensembl Compara 87-89|InParanoid
WBGene00001889	his-15	ZK131.9	ENSG00000234289	H2BFS	3	Ensembl Compara 87-89|InParanoid|OMA
WBGene00001918	his-44	F08G2.1	ENSG00000234289	H2BFS	2	Ensembl Compara 87-89|InParanoid
WBGene00001885	his-11	ZK131.5	ENSG00000273703	HIST1H2BM	3	Ensembl Compara 87-89|InParanoid|OrthoInspector
WBGene00001889	his-15	ZK131.9	ENSG00000273703	HIST1H2BM	4	Ensembl Compara 87-89|InParanoid|OMA|OrthoInspector
WBGene00001918	his-44	F08G2.1	ENSG00000273703	HIST1H2BM	3	Ensembl Compara 87-89|InParanoid|OrthoInspector
WBGene00001885	his-11	ZK131.5	ENSG00000273802	HIST1H2BG	3	Ensembl Compara 87-89|InParanoid|OrthoInspector
WBGene00001889	his-15	ZK131.9	ENSG00000273802	HIST1H2BG	3	Ensembl Compara 87-89|InParanoid|OrthoInspector
WBGene00001918	his-44	F08G2.1	ENSG00000273802	HIST1H2BG	3	Ensembl Compara 87-89|InParanoid|OrthoInspector
WBGene00001885	his-11	ZK131.5	ENSG00000274290	HIST1H2BE	3	Ensembl Compara 87-89|InParanoid|OrthoInspector
WBGene00001889	his-15	ZK131.9	ENSG00000274290	HIST1H2BE	3	Ensembl Compara 87-89|InParanoid|OrthoInspector
WBGene00001918	his-44	F08G2.1	ENSG00000274290	HIST1H2BE	3	Ensembl Compara 87-89|InParanoid|OrthoInspector
WBGene00001885	his-11	ZK131.5	ENSG00000274559	None	1	Ensembl Compara 87-89
WBGene00001889	his-15	ZK131.9	ENSG00000274559	None	1	Ensembl Compara 87-89
WBGene00001918	his-44	F08G2.1	ENSG00000274559	None	1	Ensembl Compara 87-89
WBGene00001885	his-11	ZK131.5	ENSG00000276410	HIST1H2BB	3	Ensembl Compara 87-89|InParanoid|OrthoInspector
WBGene00001889	his-15	ZK131.9	ENSG00000276410	HIST1H2BB	4	Ensembl Compara 87-89|InParanoid|OMA|OrthoInspector
WBGene00001918	his-44	F08G2.1	ENSG00000276410	HIST1H2BB	3	Ensembl Compara 87-89|InParanoid|OrthoInspector
WBGene00001885	his-11	ZK131.5	ENSG00000277224	HIST1H2BF	3	Ensembl Compara 87-89|InParanoid|OrthoInspector
WBGene00001889	his-15	ZK131.9	ENSG00000277224	HIST1H2BF	3	Ensembl Compara 87-89|InParanoid|OrthoInspector
WBGene00001918	his-44	F08G2.1	ENSG00000277224	HIST1H2BF	3	Ensembl Compara 87-89|InParanoid|OrthoInspector
WBGene00001885	his-11	ZK131.5	ENSG00000278588	HIST1H2BI	3	Ensembl Compara 87-89|InParanoid|OrthoInspector
WBGene00001889	his-15	ZK131.9	ENSG00000278588	HIST1H2BI	4	Ensembl Compara 87-89|InParanoid|OMA|OrthoInspector
WBGene00001918	his-44	F08G2.1	ENSG00000278588	HIST1H2BI	3	Ensembl Compara 87-89|InParanoid|OrthoInspector
WBGene00001885	his-11	ZK131.5	ENSG00000203814	HIST2H2BF	3	InParanoid|OrthoInspector|OrthoMCL
WBGene00001889	his-15	ZK131.9	ENSG00000203814	HIST2H2BF	4	InParanoid|OMA|OrthoInspector|OrthoMCL
WBGene00001918	his-44	F08G2.1	ENSG00000203814	HIST2H2BF	3	InParanoid|OrthoInspector|OrthoMCL
WBGene00001885	his-11	ZK131.5	ENSG00000274641	HIST1H2BO	2	InParanoid|OrthoInspector
WBGene00001889	his-15	ZK131.9	ENSG00000274641	HIST1H2BO	3	InParanoid|OMA|OrthoInspector
WBGene00001918	his-44	F08G2.1	ENSG00000274641	HIST1H2BO	2	InParanoid|OrthoInspector
WBGene00001885	his-11	ZK131.5	ENSG00000275713	HIST1H2BH	2	InParanoid|OrthoInspector
WBGene00001889	his-15	ZK131.9	ENSG00000275713	HIST1H2BH	3	InParanoid|OMA|OrthoInspector
WBGene00001918	his-44	F08G2.1	ENSG00000275713	HIST1H2BH	2	InParanoid|OrthoInspector
WBGene00002021	hsp-17	F52E1.7	ENSG00000004776	HSPB6	1	Ensembl Compara 87-89
WBGene00002021	hsp-17	F52E1.7	ENSG00000106211	HSPB1	1	Ensembl Compara 87-89
WBGene00002021	hsp-17	F52E1.7	ENSG00000109846	CRYAB	1	Ensembl Compara 87-89
WBGene00002021	hsp-17	F52E1.7	ENSG00000152137	HSPB8	1	Ensembl Compara 87-89
WBGene00002021	hsp-17	F52E1.7	ENSG00000160202	CRYAA	1	Ensembl Compara 87-89
WBGene00002021	hsp-17	F52E1.7	ENSG00000169271	HSPB3	1	Ensembl Compara 87-89
WBGene00002021	hsp-17	F52E1.7	ENSG00000170276	HSPB2	1	Ensembl Compara 87-89
WBGene00002021	hsp-17	F52E1.7	ENSG00000254445	HSPB2-C11orf52	1	Ensembl Compara 87-89
WBGene00002021	hsp-17	F52E1.7	ENSG00000276076	None	1	Ensembl Compara 87-89
WBGene00018997	None	F57B9.3	ENSG00000156976	EIF4A2	1	Ensembl Compara 87-89
WBGene00018997	None	F57B9.3	ENSG00000161960	EIF4A1	1	Ensembl Compara 87-89
WBGene00012726	None	Y39G8B.5	ENSG00000085511	MAP3K4	1	Ensembl Compara 87-89
WBGene00004002	pgp-8	T21E8.3	ENSG00000004846	ABCB5	1	OrthoMCL
WBGene00004002	pgp-8	T21E8.3	ENSG00000005471	ABCB4	1	OrthoMCL
WBGene00004002	pgp-8	T21E8.3	ENSG00000073734	ABCB11	1	OrthoMCL
WBGene00004002	pgp-8	T21E8.3	ENSG00000085563	ABCB1	1	OrthoMCL
WBGene00004810	skr-4	Y60A3A.18	ENSG00000113558	SKP1	1	Ensembl Compara 87-89
WBGene00004811	skr-5	F47H4.10	ENSG00000113558	SKP1	1	Ensembl Compara 87-89
WBGene00004810	skr-4	Y60A3A.18	ENSG00000272772	None	1	Ensembl Compara 87-89
WBGene00004811	skr-5	F47H4.10	ENSG00000272772	None	1	Ensembl Compara 87-89
WBGene00008267	None	C53A5.9	ENSG00000162873	KLHDC8A	1	Ensembl Compara 87-89
WBGene00008269	None	C53A5.11	ENSG00000162873	KLHDC8A	1	Ensembl Compara 87-89
WBGene00008267	None	C53A5.9	ENSG00000185909	KLHDC8B	1	Ensembl Compara 87-89
WBGene00008269	None	C53A5.11	ENSG00000185909	KLHDC8B	1	Ensembl Compara 87-89
WBGene00008267	None	C53A5.9	ENSG00000261609	GAN	1	Ensembl Compara 87-89
WBGene00008269	None	C53A5.11	ENSG00000261609	GAN	1	Ensembl Compara 87-89
WBGene00009908	None	F49H6.5	ENSG00000124615	MOCS1	5	Ensembl Compara 87-89|InParanoid|OMA|OrthoInspector|OrthoMCL
WBGene00012726	None	Y39G8B.5	ENSG00000104365	IKBKB	1	Ensembl Compara 87-89
WBGene00012726	None	Y39G8B.5	ENSG00000213341	CHUK	1	Ensembl Compara 87-89
WBGene00012726	None	Y39G8B.5	ENSG00000263528	IKBKE	1	OrthoInspector
WBGene00016912	clec-86	C54D1.2	ENSG00000115386	REG1A	2	InParanoid|OMA
WBGene00016912	clec-86	C54D1.2	ENSG00000134193	REG4	1	InParanoid
WBGene00016912	clec-86	C54D1.2	ENSG00000143954	REG3G	2	InParanoid|OMA
WBGene00016912	clec-86	C54D1.2	ENSG00000172016	REG3A	1	InParanoid
WBGene00016912	clec-86	C54D1.2	ENSG00000172023	REG1B	2	InParanoid|OMA
WBGene00012757	None	Y41C4A.11	ENSG00000184432	COPB2	0	Legacy Ortholist

## Sheet: pals-22 vs. pals-22 pals-25
S8 Table - Ortholist results of: IPR genes; genes up in both pals-22/N2 and pals-22/pals-25 comparisons; and genes regulated by hsf-1*.
All gene lists use WS263 annotation
WormBase_ID	Common_Name	Locus_ID	Ensembl_ID	HGNC_Symbol	No. of Matched Databases	Matched_Databases		Unique genes
WBGene00000022	abt-4	Y39D8C.1	ENSG00000064687	ABCA7	1	OrthoMCL		WBGene00000022
WBGene00000022	abt-4	Y39D8C.1	ENSG00000107331	ABCA2	1	OrthoMCL		WBGene00000105
WBGene00000022	abt-4	Y39D8C.1	ENSG00000141338	ABCA8	2	Ensembl Compara 87-89|OrthoMCL		WBGene00000190
WBGene00000022	abt-4	Y39D8C.1	ENSG00000144452	ABCA12	1	OrthoMCL		WBGene00000214
WBGene00000022	abt-4	Y39D8C.1	ENSG00000154258	ABCA9	2	Ensembl Compara 87-89|OrthoMCL		WBGene00001594
WBGene00000022	abt-4	Y39D8C.1	ENSG00000154262	ABCA6	2	Ensembl Compara 87-89|OrthoMCL		WBGene00000294
WBGene00000022	abt-4	Y39D8C.1	ENSG00000154263	ABCA10	2	Ensembl Compara 87-89|OrthoMCL		WBGene00009595
WBGene00000022	abt-4	Y39D8C.1	ENSG00000154265	ABCA5	2	Ensembl Compara 87-89|OrthoMCL		WBGene00010545
WBGene00000022	abt-4	Y39D8C.1	ENSG00000165029	ABCA1	1	OrthoMCL		WBGene00019967
WBGene00000022	abt-4	Y39D8C.1	ENSG00000179869	ABCA13	1	OrthoMCL		WBGene00007913
WBGene00000022	abt-4	Y39D8C.1	ENSG00000198691	ABCA4	1	OrthoMCL		WBGene00000393
WBGene00000022	abt-4	Y39D8C.1	ENSG00000167972	ABCA3	6	Ensembl Compara 87-89|Homologene|InParanoid|OMA|OrthoInspector|OrthoMCL		WBGene00011821
WBGene00000105	alg-1	F48F7.1	ENSG00000092847	AGO1	5	Ensembl Compara 87-89|InParanoid|OMA|OrthoInspector|OrthoMCL		WBGene00008296
WBGene00000105	alg-1	F48F7.1	ENSG00000123908	AGO2	6	Ensembl Compara 87-89|Homologene|InParanoid|OMA|OrthoInspector|OrthoMCL		WBGene00003411
WBGene00000105	alg-1	F48F7.1	ENSG00000126070	AGO3	5	Ensembl Compara 87-89|InParanoid|OMA|OrthoInspector|OrthoMCL		WBGene00003412
WBGene00000105	alg-1	F48F7.1	ENSG00000134698	AGO4	5	Ensembl Compara 87-89|InParanoid|OMA|OrthoInspector|OrthoMCL		WBGene00000512
WBGene00000190	arf-1.1	F45E4.1	ENSG00000122644	ARL4A	1	Ensembl Compara 87-89		WBGene00013847
WBGene00000190	arf-1.1	F45E4.1	ENSG00000152213	ARL11	1	Ensembl Compara 87-89		WBGene00000761
WBGene00000190	arf-1.1	F45E4.1	ENSG00000175414	ARL10	1	Ensembl Compara 87-89		WBGene00019986
WBGene00000190	arf-1.1	F45E4.1	ENSG00000175906	ARL4D	1	Ensembl Compara 87-89		WBGene00000781
WBGene00000190	arf-1.1	F45E4.1	ENSG00000179674	ARL14	1	Ensembl Compara 87-89		WBGene00000783
WBGene00000190	arf-1.1	F45E4.1	ENSG00000188042	ARL4C	1	Ensembl Compara 87-89		WBGene00000784
WBGene00000190	arf-1.1	F45E4.1	ENSG00000196503	ARL9	1	Ensembl Compara 87-89		WBGene00000785
WBGene00000214	asp-1	Y39B6A.20	ENSG00000096088	PGC	1	Ensembl Compara 87-89		WBGene00010204
WBGene00000214	asp-1	Y39B6A.20	ENSG00000182240	BACE2	1	Ensembl Compara 87-89		WBGene00021070
WBGene00000214	asp-1	Y39B6A.20	ENSG00000186318	BACE1	1	Ensembl Compara 87-89		WBGene00000799
WBGene00000214	asp-1	Y39B6A.20	ENSG00000196188	CTSE	1	Ensembl Compara 87-89		WBGene00003828
WBGene00000214	asp-1	Y39B6A.20	ENSG00000229183	PGA4	1	Ensembl Compara 87-89		WBGene00000841
WBGene00000214	asp-1	Y39B6A.20	ENSG00000229859	PGA3	1	Ensembl Compara 87-89		WBGene00000950
WBGene00000214	asp-1	Y39B6A.20	ENSG00000256713	PGA5	1	Ensembl Compara 87-89		WBGene00017082
WBGene00001594	glc-4	C27H5.8	ENSG00000101958	GLRA2	1	Ensembl Compara 87-89		WBGene00001025
WBGene00001594	glc-4	C27H5.8	ENSG00000109738	GLRB	1	Ensembl Compara 87-89		WBGene00001156
WBGene00001594	glc-4	C27H5.8	ENSG00000145451	GLRA3	1	Ensembl Compara 87-89		WBGene00001158
WBGene00001594	glc-4	C27H5.8	ENSG00000145888	GLRA1	1	Ensembl Compara 87-89		WBGene00001250
WBGene00001594	glc-4	C27H5.8	ENSG00000188828	GLRA4	1	Ensembl Compara 87-89		WBGene00006677
WBGene00000294	cas-1	F41G4.2	ENSG00000112186	CAP2	3	Ensembl Compara 87-89|OrthoInspector|OrthoMCL		WBGene00006683
WBGene00000294	cas-1	F41G4.2	ENSG00000131236	CAP1	4	Ensembl Compara 87-89|Homologene|OrthoInspector|OrthoMCL		WBGene00001207
WBGene00009595	None	F40F12.7	ENSG00000005339	CREBBP	1	Ensembl Compara 87-89		WBGene00010275
WBGene00010545	cbp-2	K03H1.10	ENSG00000005339	CREBBP	1	Ensembl Compara 87-89		WBGene00004245
WBGene00009595	None	F40F12.7	ENSG00000100393	EP300	1	Ensembl Compara 87-89		WBGene00001430
WBGene00010545	cbp-2	K03H1.10	ENSG00000100393	EP300	1	Ensembl Compara 87-89		WBGene00001441
WBGene00019967	cyp-33C8	R08F11.3	ENSG00000100197	CYP2D6	2	Ensembl Compara 87-89|OrthoInspector		WBGene00001489
WBGene00007913	cyp-36A1	C34B7.3	ENSG00000100197	CYP2D6	1	OrthoInspector		WBGene00001502
WBGene00019967	cyp-33C8	R08F11.3	ENSG00000134716	CYP2J2	5	Ensembl Compara 87-89|Homologene|InParanoid|OrthoInspector|OrthoMCL		WBGene00001685
WBGene00007913	cyp-36A1	C34B7.3	ENSG00000134716	CYP2J2	2	OrthoInspector|OrthoMCL		WBGene00001745
WBGene00019967	cyp-33C8	R08F11.3	ENSG00000155016	CYP2U1	3	Ensembl Compara 87-89|OrthoInspector|OrthoMCL		WBGene00001768
WBGene00007913	cyp-36A1	C34B7.3	ENSG00000155016	CYP2U1	2	OrthoInspector|OrthoMCL		WBGene00001817
WBGene00019967	cyp-33C8	R08F11.3	ENSG00000186104	CYP2R1	2	Ensembl Compara 87-89|InParanoid		WBGene00022281
WBGene00007913	cyp-36A1	C34B7.3	ENSG00000186104	CYP2R1	1	OrthoInspector		WBGene00001883
WBGene00019967	cyp-33C8	R08F11.3	ENSG00000205702	CYP2D7	1	Ensembl Compara 87-89		WBGene00001887
WBGene00000393	cdf-1	C15B12.7	ENSG00000170385	SLC30A1	4	Ensembl Compara 87-89|InParanoid|OrthoInspector|OrthoMCL		WBGene00001899
WBGene00011821	cdf-2	T18D3.3	ENSG00000170385	SLC30A1	1	OrthoMCL		WBGene00001885
WBGene00008296	cdr-2	C54D10.1	ENSG00000146267	FAXC	1	Ensembl Compara 87-89		WBGene00001889
WBGene00003411	mrp-5	F14F4.3	ENSG00000023839	ABCC2	1	OrthoMCL		WBGene00001918
WBGene00003412	mrp-6	F20B6.3	ENSG00000023839	ABCC2	1	OrthoMCL		WBGene00001955
WBGene00003411	mrp-5	F14F4.3	ENSG00000091262	ABCC6	1	OrthoMCL		WBGene00019249
WBGene00003412	mrp-6	F20B6.3	ENSG00000091262	ABCC6	1	OrthoMCL		WBGene00002021
WBGene00003411	mrp-5	F14F4.3	ENSG00000103222	ABCC1	1	OrthoMCL		WBGene00002041
WBGene00003412	mrp-6	F20B6.3	ENSG00000103222	ABCC1	1	OrthoMCL		WBGene00002055
WBGene00003411	mrp-5	F14F4.3	ENSG00000108846	ABCC3	1	OrthoMCL		WBGene00018997
WBGene00003412	mrp-6	F20B6.3	ENSG00000108846	ABCC3	1	OrthoMCL		WBGene00002173
WBGene00000512	ckb-2	B0285.9	ENSG00000100288	CHKB	1	Ensembl Compara 87-89		WBGene00002199
WBGene00000512	ckb-2	B0285.9	ENSG00000110721	CHKA	1	Ensembl Compara 87-89		WBGene00006894
WBGene00000512	ckb-2	B0285.9	ENSG00000254413	CHKB-CPT1B	1	Ensembl Compara 87-89		WBGene00011168
WBGene00013847	cls-3	ZC84.3	ENSG00000074054	CLASP1	5	Ensembl Compara 87-89|InParanoid|OMA|OrthoInspector|OrthoMCL		WBGene00021745
WBGene00013847	cls-3	ZC84.3	ENSG00000163539	CLASP2	6	Ensembl Compara 87-89|Homologene|InParanoid|OMA|OrthoInspector|OrthoMCL		WBGene00002215
WBGene00000761	coq-1	C24A11.9	ENSG00000148459	PDSS1	6	Ensembl Compara 87-89|Homologene|InParanoid|OMA|OrthoInspector|OrthoMCL		WBGene00002217
WBGene00019986	None	R09F10.1	ENSG00000135047	CTSL	1	OrthoMCL		WBGene00002249
WBGene00019986	None	R09F10.1	ENSG00000136943	CTSV	1	OrthoMCL		WBGene00017948
WBGene00019986	None	R09F10.1	ENSG00000143387	CTSK	1	OrthoMCL		WBGene00017080
WBGene00019986	None	R09F10.1	ENSG00000163131	CTSS	1	OrthoMCL		WBGene00016974
WBGene00000781	cpr-1	C52E4.1	ENSG00000164733	CTSB	3	Ensembl Compara 87-89|OMA|OrthoInspector		WBGene00007944
WBGene00000783	cpr-3	T10H4.12	ENSG00000164733	CTSB	2	Ensembl Compara 87-89|OMA		WBGene00002999
WBGene00000784	cpr-4	F44C4.3	ENSG00000164733	CTSB	4	Ensembl Compara 87-89|OMA|OrthoInspector|OrthoMCL		WBGene00003597
WBGene00000785	cpr-5	W07B8.5	ENSG00000164733	CTSB	4	Ensembl Compara 87-89|InParanoid|OrthoInspector|OrthoMCL		WBGene00009895
WBGene00010204	None	F57F5.1	ENSG00000164733	CTSB	4	Ensembl Compara 87-89|InParanoid|OrthoInspector|OrthoMCL		WBGene00003149
WBGene00021070	cpr-8	W07B8.1	ENSG00000164733	CTSB	2	Ensembl Compara 87-89|OrthoInspector		WBGene00009058
WBGene00000799	crn-6	K04H4.6	ENSG00000105612	DNASE2	4	Ensembl Compara 87-89|OMA|OrthoInspector|OrthoMCL		WBGene00006063
WBGene00003828	nuc-1	C07B5.5	ENSG00000105612	DNASE2	4	Ensembl Compara 87-89|OMA|OrthoInspector|OrthoMCL		WBGene00006533
WBGene00000799	crn-6	K04H4.6	ENSG00000137976	DNASE2B	6	Ensembl Compara 87-89|Homologene|InParanoid|OMA|OrthoInspector|OrthoMCL		WBGene00003243
WBGene00003828	nuc-1	C07B5.5	ENSG00000137976	DNASE2B	5	Ensembl Compara 87-89|Homologene|OMA|OrthoInspector|OrthoMCL		WBGene00004859
WBGene00000841	cul-6	K08E7.7	ENSG00000055130	CUL1	2	Ensembl Compara 87-89|OrthoMCL		WBGene00012726
WBGene00000950	deg-1	C47C12.6	ENSG00000111319	SCNN1A	3	Ensembl Compara 87-89|InParanoid|OrthoInspector		WBGene00003519
WBGene00000950	deg-1	C47C12.6	ENSG00000162572	SCNN1D	3	Ensembl Compara 87-89|InParanoid|OrthoInspector		WBGene00003555
WBGene00000950	deg-1	C47C12.6	ENSG00000166828	SCNN1G	4	Ensembl Compara 87-89|Homologene|InParanoid|OrthoInspector		WBGene00003564
WBGene00000950	deg-1	C47C12.6	ENSG00000168447	SCNN1B	3	Ensembl Compara 87-89|InParanoid|OrthoInspector		WBGene00003567
WBGene00017082	None	DC2.5	ENSG00000102796	DHRS12	1	Ensembl Compara 87-89		WBGene00003583
WBGene00017082	None	DC2.5	ENSG00000186153	WWOX	5	Ensembl Compara 87-89|Homologene|InParanoid|OrthoInspector|OrthoMCL		WBGene00003621
WBGene00017082	None	DC2.5	ENSG00000258466	None	1	Ensembl Compara 87-89		WBGene00003730
WBGene00001025	dnj-7	C55B6.2	ENSG00000102580	DNAJC3	6	Ensembl Compara 87-89|Homologene|InParanoid|OMA|OrthoInspector|OrthoMCL		WBGene00021983
WBGene00001156	ech-7	Y105E8A.4	ENSG00000127884	ECHS1	4	Ensembl Compara 87-89|OMA|OrthoInspector|OrthoMCL		WBGene00018764
WBGene00001158	ech-9	F01G10.3	ENSG00000113790	EHHADH	1	Ensembl Compara 87-89		WBGene00003903
WBGene00001158	ech-9	F01G10.3	ENSG00000138796	HADH	1	Ensembl Compara 87-89		WBGene00022801
WBGene00001250	elt-2	C33D3.1	ENSG00000104447	TRPS1	1	Ensembl Compara 87-89		WBGene00017592
WBGene00006677	twk-24	F55C5.3	ENSG00000186795	KCNK18	1	Ensembl Compara 87-89		WBGene00044302
WBGene00006683	twk-31	Y47D3B.5	ENSG00000186795	KCNK18	1	Ensembl Compara 87-89		WBGene00015752
WBGene00001207	egl-43	R53.3	ENSG00000085276	MECOM	4	Ensembl Compara 87-89|InParanoid|OrthoInspector|OrthoMCL		WBGene00003980
WBGene00001207	egl-43	R53.3	ENSG00000142611	PRDM16	3	Ensembl Compara 87-89|InParanoid|OrthoMCL		WBGene00003995
WBGene00010275	acc-1	F58G6.4	ENSG00000102287	GABRE	1	Ensembl Compara 87-89		WBGene00004002
WBGene00010275	acc-1	F58G6.4	ENSG00000113327	GABRG2	1	Ensembl Compara 87-89		WBGene00020471
WBGene00010275	acc-1	F58G6.4	ENSG00000163285	GABRG1	1	Ensembl Compara 87-89		WBGene00018696
WBGene00010275	acc-1	F58G6.4	ENSG00000182256	GABRG3	1	Ensembl Compara 87-89		WBGene00004053
WBGene00004245	puf-9	W06B11.2	ENSG00000055917	PUM2	3	InParanoid|OrthoInspector|OrthoMCL		WBGene00004052
WBGene00004245	puf-9	W06B11.2	ENSG00000134644	PUM1	3	InParanoid|OrthoInspector|OrthoMCL		WBGene00004058
WBGene00001430	fkb-5	C50F2.6	ENSG00000122642	FKBP9	4	Ensembl Compara 87-89|Homologene|OrthoInspector|OrthoMCL		WBGene00012131
WBGene00001430	fkb-5	C50F2.6	ENSG00000134285	FKBP11	1	Ensembl Compara 87-89		WBGene00004135
WBGene00001430	fkb-5	C50F2.6	ENSG00000141756	FKBP10	3	Ensembl Compara 87-89|OrthoInspector|OrthoMCL		WBGene00004184
WBGene00001441	fkh-9	K03C7.2	ENSG00000111206	FOXM1	1	Ensembl Compara 87-89		WBGene00004316
WBGene00001489	frm-2	T04C9.6	ENSG00000095203	EPB41L4B	3	Ensembl Compara 87-89|InParanoid|OrthoInspector		WBGene00004321
WBGene00001489	frm-2	T04C9.6	ENSG00000115109	EPB41L5	4	Ensembl Compara 87-89|InParanoid|OrthoInspector|OrthoMCL		WBGene00004368
WBGene00001502	ftt-2	F52D10.3	ENSG00000128245	YWHAH	1	Ensembl Compara 87-89		WBGene00004393
WBGene00001502	ftt-2	F52D10.3	ENSG00000134308	YWHAQ	2	Ensembl Compara 87-89|OrthoInspector		WBGene00004402
WBGene00001502	ftt-2	F52D10.3	ENSG00000164924	YWHAZ	6	Ensembl Compara 87-89|Homologene|InParanoid|OMA|OrthoInspector|OrthoMCL		WBGene00004457
WBGene00001502	ftt-2	F52D10.3	ENSG00000166913	YWHAB	5	Ensembl Compara 87-89|InParanoid|OMA|OrthoInspector|OrthoMCL		WBGene00004735
WBGene00001502	ftt-2	F52D10.3	ENSG00000170027	YWHAG	1	Ensembl Compara 87-89		WBGene00004809
WBGene00001502	ftt-2	F52D10.3	ENSG00000175793	SFN	1	Ensembl Compara 87-89		WBGene00004810
WBGene00001685	gpd-3	K10B3.7	ENSG00000105679	GAPDHS	2	Ensembl Compara 87-89|OrthoMCL		WBGene00004811
WBGene00001685	gpd-3	K10B3.7	ENSG00000111640	GAPDH	5	Ensembl Compara 87-89|Homologene|InParanoid|OrthoInspector|OrthoMCL		WBGene00004900
WBGene00001745	gsa-1	R06A10.2	ENSG00000087460	GNAS	5	Ensembl Compara 87-89|Homologene|OMA|OrthoInspector|OrthoMCL		WBGene00006351
WBGene00001745	gsa-1	R06A10.2	ENSG00000141404	GNAL	4	Ensembl Compara 87-89|InParanoid|OrthoInspector|OrthoMCL		WBGene00015540
WBGene00001768	gst-20	Y48E1B.10	ENSG00000170899	GSTA4	1	Ensembl Compara 87-89		WBGene00006527
WBGene00001768	gst-20	Y48E1B.10	ENSG00000174156	GSTA3	1	Ensembl Compara 87-89		WBGene00006608
WBGene00001768	gst-20	Y48E1B.10	ENSG00000182793	GSTA5	1	Ensembl Compara 87-89		WBGene00006609
WBGene00001768	gst-20	Y48E1B.10	ENSG00000243955	GSTA1	1	Ensembl Compara 87-89		WBGene00006718
WBGene00001768	gst-20	Y48E1B.10	ENSG00000244067	GSTA2	1	Ensembl Compara 87-89		WBGene00019832
WBGene00001768	gst-20	Y48E1B.10	ENSG00000163106	HPGDS	1	Homologene		WBGene00006810
WBGene00001817	haf-7	Y50E8A.16	ENSG00000150967	ABCB9	2	Ensembl Compara 87-89|Homologene		WBGene00006923
WBGene00001817	haf-7	Y50E8A.16	ENSG00000168394	TAP1	1	Ensembl Compara 87-89		WBGene00013869
WBGene00001817	haf-7	Y50E8A.16	ENSG00000204267	TAP2	1	Ensembl Compara 87-89		WBGene00006959
WBGene00001817	haf-7	Y50E8A.16	ENSG00000250264	None	1	Ensembl Compara 87-89		WBGene00006971
WBGene00022281	abtm-1	Y74C10AR.3	ENSG00000115657	ABCB6	1	OrthoMCL		WBGene00007010
WBGene00001817	haf-7	Y50E8A.16	ENSG00000197150	ABCB8	1	OrthoMCL		WBGene00008265
WBGene00001883	his-9	ZK131.3	ENSG00000168148	HIST3H3	1	Ensembl Compara 87-89		WBGene00019869
WBGene00001887	his-13	ZK131.7	ENSG00000168148	HIST3H3	1	Ensembl Compara 87-89		WBGene00017428
WBGene00001899	his-25	ZK131.2	ENSG00000168148	HIST3H3	1	Ensembl Compara 87-89		WBGene00015632
WBGene00001883	his-9	ZK131.3	ENSG00000197153	HIST1H3J	5	Ensembl Compara 87-89|Homologene|InParanoid|OrthoInspector|OrthoMCL		WBGene00017969
WBGene00001887	his-13	ZK131.7	ENSG00000197153	HIST1H3J	6	Ensembl Compara 87-89|Homologene|InParanoid|OMA|OrthoInspector|OrthoMCL		WBGene00012251
WBGene00001899	his-25	ZK131.2	ENSG00000197153	HIST1H3J	5	Ensembl Compara 87-89|Homologene|InParanoid|OrthoInspector|OrthoMCL		WBGene00012253
WBGene00001883	his-9	ZK131.3	ENSG00000197409	HIST1H3D	4	Ensembl Compara 87-89|InParanoid|OrthoInspector|OrthoMCL		WBGene00015050
WBGene00001887	his-13	ZK131.7	ENSG00000197409	HIST1H3D	4	Ensembl Compara 87-89|InParanoid|OrthoInspector|OrthoMCL		WBGene00007694
WBGene00001899	his-25	ZK131.2	ENSG00000197409	HIST1H3D	4	Ensembl Compara 87-89|InParanoid|OrthoInspector|OrthoMCL		WBGene00016507
WBGene00001883	his-9	ZK131.3	ENSG00000203818	HIST2H3PS2	2	Ensembl Compara 87-89|OrthoMCL		WBGene00007750
WBGene00001887	his-13	ZK131.7	ENSG00000203818	HIST2H3PS2	3	Ensembl Compara 87-89|OMA|OrthoMCL		WBGene00009531
WBGene00001899	his-25	ZK131.2	ENSG00000203818	HIST2H3PS2	2	Ensembl Compara 87-89|OrthoMCL		WBGene00019349
WBGene00001883	his-9	ZK131.3	ENSG00000273983	HIST1H3G	3	Ensembl Compara 87-89|InParanoid|OrthoInspector		WBGene00020613
WBGene00001887	his-13	ZK131.7	ENSG00000273983	HIST1H3G	3	Ensembl Compara 87-89|InParanoid|OrthoInspector		WBGene00020875
WBGene00001899	his-25	ZK131.2	ENSG00000273983	HIST1H3G	3	Ensembl Compara 87-89|InParanoid|OrthoInspector		WBGene00007836
WBGene00001883	his-9	ZK131.3	ENSG00000274267	HIST1H3B	3	Ensembl Compara 87-89|InParanoid|OrthoInspector		WBGene00007857
WBGene00001887	his-13	ZK131.7	ENSG00000274267	HIST1H3B	3	Ensembl Compara 87-89|InParanoid|OrthoInspector		WBGene00020989
WBGene00001899	his-25	ZK131.2	ENSG00000274267	HIST1H3B	3	Ensembl Compara 87-89|InParanoid|OrthoInspector		WBGene00008018
WBGene00001883	his-9	ZK131.3	ENSG00000274750	HIST1H3E	3	Ensembl Compara 87-89|InParanoid|OrthoInspector		WBGene00021176
WBGene00001887	his-13	ZK131.7	ENSG00000274750	HIST1H3E	3	Ensembl Compara 87-89|InParanoid|OrthoInspector		WBGene00019314
WBGene00001899	his-25	ZK131.2	ENSG00000274750	HIST1H3E	3	Ensembl Compara 87-89|InParanoid|OrthoInspector		WBGene00022189
WBGene00001883	his-9	ZK131.3	ENSG00000275379	HIST1H3I	3	Ensembl Compara 87-89|InParanoid|OrthoInspector		WBGene00044760
WBGene00001887	his-13	ZK131.7	ENSG00000275379	HIST1H3I	3	Ensembl Compara 87-89|InParanoid|OrthoInspector		WBGene00020004
WBGene00001899	his-25	ZK131.2	ENSG00000275379	HIST1H3I	3	Ensembl Compara 87-89|InParanoid|OrthoInspector		WBGene00008267
WBGene00001883	his-9	ZK131.3	ENSG00000275714	HIST1H3A	3	Ensembl Compara 87-89|InParanoid|OrthoInspector		WBGene00008269
WBGene00001887	his-13	ZK131.7	ENSG00000275714	HIST1H3A	3	Ensembl Compara 87-89|InParanoid|OrthoInspector		WBGene00015955
WBGene00001899	his-25	ZK131.2	ENSG00000275714	HIST1H3A	3	Ensembl Compara 87-89|InParanoid|OrthoInspector		WBGene00011486
WBGene00001883	his-9	ZK131.3	ENSG00000277775	HIST1H3F	3	Ensembl Compara 87-89|InParanoid|OrthoInspector		WBGene00017705
WBGene00001887	his-13	ZK131.7	ENSG00000277775	HIST1H3F	3	Ensembl Compara 87-89|InParanoid|OrthoInspector		WBGene00022570
WBGene00001899	his-25	ZK131.2	ENSG00000277775	HIST1H3F	3	Ensembl Compara 87-89|InParanoid|OrthoInspector		WBGene00022572
WBGene00001883	his-9	ZK131.3	ENSG00000278272	HIST1H3C	3	Ensembl Compara 87-89|InParanoid|OrthoInspector		WBGene00008476
WBGene00001887	his-13	ZK131.7	ENSG00000278272	HIST1H3C	3	Ensembl Compara 87-89|InParanoid|OrthoInspector		WBGene00011076
WBGene00001899	his-25	ZK131.2	ENSG00000278272	HIST1H3C	3	Ensembl Compara 87-89|InParanoid|OrthoInspector		WBGene00020895
WBGene00001883	his-9	ZK131.3	ENSG00000278828	HIST1H3H	3	Ensembl Compara 87-89|InParanoid|OrthoInspector		WBGene00219316
WBGene00001887	his-13	ZK131.7	ENSG00000278828	HIST1H3H	3	Ensembl Compara 87-89|InParanoid|OrthoInspector		WBGene00014001
WBGene00001899	his-25	ZK131.2	ENSG00000278828	HIST1H3H	3	Ensembl Compara 87-89|InParanoid|OrthoInspector		WBGene00009162
WBGene00001885	his-11	ZK131.5	ENSG00000101812	H2BFM	1	Ensembl Compara 87-89		WBGene00009192
WBGene00001889	his-15	ZK131.9	ENSG00000101812	H2BFM	1	Ensembl Compara 87-89		WBGene00018488
WBGene00001918	his-44	F08G2.1	ENSG00000101812	H2BFM	1	Ensembl Compara 87-89		WBGene00022499
WBGene00001885	his-11	ZK131.5	ENSG00000123569	H2BFWT	1	Ensembl Compara 87-89		WBGene00010904
WBGene00001889	his-15	ZK131.9	ENSG00000123569	H2BFWT	1	Ensembl Compara 87-89		WBGene00015965
WBGene00001918	his-44	F08G2.1	ENSG00000123569	H2BFWT	1	Ensembl Compara 87-89		WBGene00021709
WBGene00001885	his-11	ZK131.5	ENSG00000124635	HIST1H2BJ	5	Ensembl Compara 87-89|Homologene|InParanoid|OrthoInspector|OrthoMCL		WBGene00007885
WBGene00001889	his-15	ZK131.9	ENSG00000124635	HIST1H2BJ	6	Ensembl Compara 87-89|Homologene|InParanoid|OMA|OrthoInspector|OrthoMCL		WBGene00019515
WBGene00001918	his-44	F08G2.1	ENSG00000124635	HIST1H2BJ	5	Ensembl Compara 87-89|Homologene|InParanoid|OrthoInspector|OrthoMCL		WBGene00011564
WBGene00001885	his-11	ZK131.5	ENSG00000146047	HIST1H2BA	4	Ensembl Compara 87-89|InParanoid|OrthoInspector|OrthoMCL		WBGene00012464
WBGene00001889	his-15	ZK131.9	ENSG00000146047	HIST1H2BA	5	Ensembl Compara 87-89|InParanoid|OMA|OrthoInspector|OrthoMCL		WBGene00011423
WBGene00001918	his-44	F08G2.1	ENSG00000146047	HIST1H2BA	4	Ensembl Compara 87-89|InParanoid|OrthoInspector|OrthoMCL		WBGene00009908
WBGene00001885	his-11	ZK131.5	ENSG00000158373	HIST1H2BD	4	Ensembl Compara 87-89|InParanoid|OrthoInspector|OrthoMCL		WBGene00019018
WBGene00001889	his-15	ZK131.9	ENSG00000158373	HIST1H2BD	5	Ensembl Compara 87-89|InParanoid|OMA|OrthoInspector|OrthoMCL		WBGene00019146
WBGene00001918	his-44	F08G2.1	ENSG00000158373	HIST1H2BD	4	Ensembl Compara 87-89|InParanoid|OrthoInspector|OrthoMCL		WBGene00019273
WBGene00001885	his-11	ZK131.5	ENSG00000180596	HIST1H2BC	4	Ensembl Compara 87-89|InParanoid|OrthoInspector|OrthoMCL		WBGene00010134
WBGene00001889	his-15	ZK131.9	ENSG00000180596	HIST1H2BC	4	Ensembl Compara 87-89|InParanoid|OrthoInspector|OrthoMCL		WBGene00010296
WBGene00001918	his-44	F08G2.1	ENSG00000180596	HIST1H2BC	4	Ensembl Compara 87-89|InParanoid|OrthoInspector|OrthoMCL		WBGene00010593
WBGene00001885	his-11	ZK131.5	ENSG00000184678	HIST2H2BE	4	Ensembl Compara 87-89|InParanoid|OrthoInspector|OrthoMCL		WBGene00010700
WBGene00001889	his-15	ZK131.9	ENSG00000184678	HIST2H2BE	5	Ensembl Compara 87-89|InParanoid|OMA|OrthoInspector|OrthoMCL		WBGene00045338
WBGene00001918	his-44	F08G2.1	ENSG00000184678	HIST2H2BE	4	Ensembl Compara 87-89|InParanoid|OrthoInspector|OrthoMCL		WBGene00021043
WBGene00001885	his-11	ZK131.5	ENSG00000185130	HIST1H2BL	4	Ensembl Compara 87-89|InParanoid|OrthoInspector|OrthoMCL		WBGene00011361
WBGene00001889	his-15	ZK131.9	ENSG00000185130	HIST1H2BL	5	Ensembl Compara 87-89|InParanoid|OMA|OrthoInspector|OrthoMCL		WBGene00011399
WBGene00001918	his-44	F08G2.1	ENSG00000185130	HIST1H2BL	4	Ensembl Compara 87-89|InParanoid|OrthoInspector|OrthoMCL		WBGene00011474
WBGene00001885	his-11	ZK131.5	ENSG00000196890	HIST3H2BB	4	Ensembl Compara 87-89|InParanoid|OrthoInspector|OrthoMCL		WBGene00011767
WBGene00001889	his-15	ZK131.9	ENSG00000196890	HIST3H2BB	5	Ensembl Compara 87-89|InParanoid|OMA|OrthoInspector|OrthoMCL		WBGene00011880
WBGene00001918	his-44	F08G2.1	ENSG00000196890	HIST3H2BB	4	Ensembl Compara 87-89|InParanoid|OrthoInspector|OrthoMCL		WBGene00011932
WBGene00001885	his-11	ZK131.5	ENSG00000197903	HIST1H2BK	4	Ensembl Compara 87-89|InParanoid|OrthoInspector|OrthoMCL		WBGene00011938
WBGene00001889	his-15	ZK131.9	ENSG00000197903	HIST1H2BK	5	Ensembl Compara 87-89|InParanoid|OMA|OrthoInspector|OrthoMCL		WBGene00012144
WBGene00001918	his-44	F08G2.1	ENSG00000197903	HIST1H2BK	4	Ensembl Compara 87-89|InParanoid|OrthoInspector|OrthoMCL		WBGene00020784
WBGene00001885	his-11	ZK131.5	ENSG00000233822	HIST1H2BN	4	Ensembl Compara 87-89|InParanoid|OrthoInspector|OrthoMCL		WBGene00012722
WBGene00001889	his-15	ZK131.9	ENSG00000233822	HIST1H2BN	4	Ensembl Compara 87-89|InParanoid|OrthoInspector|OrthoMCL		WBGene00012891
WBGene00001918	his-44	F08G2.1	ENSG00000233822	HIST1H2BN	4	Ensembl Compara 87-89|InParanoid|OrthoInspector|OrthoMCL		WBGene00013042
WBGene00001885	his-11	ZK131.5	ENSG00000234289	H2BFS	2	Ensembl Compara 87-89|InParanoid		WBGene00013215
WBGene00001889	his-15	ZK131.9	ENSG00000234289	H2BFS	3	Ensembl Compara 87-89|InParanoid|OMA		WBGene00013216
WBGene00001918	his-44	F08G2.1	ENSG00000234289	H2BFS	2	Ensembl Compara 87-89|InParanoid		WBGene00013379
WBGene00001885	his-11	ZK131.5	ENSG00000273703	HIST1H2BM	3	Ensembl Compara 87-89|InParanoid|OrthoInspector		WBGene00013492
WBGene00001889	his-15	ZK131.9	ENSG00000273703	HIST1H2BM	4	Ensembl Compara 87-89|InParanoid|OMA|OrthoInspector		WBGene00016511
WBGene00001918	his-44	F08G2.1	ENSG00000273703	HIST1H2BM	3	Ensembl Compara 87-89|InParanoid|OrthoInspector		WBGene00013855
WBGene00001885	his-11	ZK131.5	ENSG00000273802	HIST1H2BG	3	Ensembl Compara 87-89|InParanoid|OrthoInspector		WBGene00014215
WBGene00001889	his-15	ZK131.9	ENSG00000273802	HIST1H2BG	3	Ensembl Compara 87-89|InParanoid|OrthoInspector		WBGene00019068
WBGene00001918	his-44	F08G2.1	ENSG00000273802	HIST1H2BG	3	Ensembl Compara 87-89|InParanoid|OrthoInspector		WBGene00016022
WBGene00001885	his-11	ZK131.5	ENSG00000274290	HIST1H2BE	3	Ensembl Compara 87-89|InParanoid|OrthoInspector		WBGene00015356
WBGene00001889	his-15	ZK131.9	ENSG00000274290	HIST1H2BE	3	Ensembl Compara 87-89|InParanoid|OrthoInspector		WBGene00015793
WBGene00001918	his-44	F08G2.1	ENSG00000274290	HIST1H2BE	3	Ensembl Compara 87-89|InParanoid|OrthoInspector		WBGene00016030
WBGene00001885	his-11	ZK131.5	ENSG00000274559	None	1	Ensembl Compara 87-89		WBGene00016188
WBGene00001889	his-15	ZK131.9	ENSG00000274559	None	1	Ensembl Compara 87-89		WBGene00016314
WBGene00001918	his-44	F08G2.1	ENSG00000274559	None	1	Ensembl Compara 87-89		WBGene00016415
WBGene00001885	his-11	ZK131.5	ENSG00000276410	HIST1H2BB	3	Ensembl Compara 87-89|InParanoid|OrthoInspector		WBGene00016539
WBGene00001889	his-15	ZK131.9	ENSG00000276410	HIST1H2BB	4	Ensembl Compara 87-89|InParanoid|OMA|OrthoInspector		WBGene00016190
WBGene00001918	his-44	F08G2.1	ENSG00000276410	HIST1H2BB	3	Ensembl Compara 87-89|InParanoid|OrthoInspector		WBGene00018354
WBGene00001885	his-11	ZK131.5	ENSG00000277224	HIST1H2BF	3	Ensembl Compara 87-89|InParanoid|OrthoInspector		WBGene00019590
WBGene00001889	his-15	ZK131.9	ENSG00000277224	HIST1H2BF	3	Ensembl Compara 87-89|InParanoid|OrthoInspector		WBGene00022610
WBGene00001918	his-44	F08G2.1	ENSG00000277224	HIST1H2BF	3	Ensembl Compara 87-89|InParanoid|OrthoInspector		WBGene00016735
WBGene00001885	his-11	ZK131.5	ENSG00000278588	HIST1H2BI	3	Ensembl Compara 87-89|InParanoid|OrthoInspector		WBGene00017103
WBGene00001889	his-15	ZK131.9	ENSG00000278588	HIST1H2BI	4	Ensembl Compara 87-89|InParanoid|OMA|OrthoInspector		WBGene00016920
WBGene00001918	his-44	F08G2.1	ENSG00000278588	HIST1H2BI	3	Ensembl Compara 87-89|InParanoid|OrthoInspector		WBGene00016939
WBGene00001885	his-11	ZK131.5	ENSG00000203814	HIST2H2BF	3	InParanoid|OrthoInspector|OrthoMCL		WBGene00012782
WBGene00001889	his-15	ZK131.9	ENSG00000203814	HIST2H2BF	4	InParanoid|OMA|OrthoInspector|OrthoMCL		WBGene00019895
WBGene00001918	his-44	F08G2.1	ENSG00000203814	HIST2H2BF	3	InParanoid|OrthoInspector|OrthoMCL		WBGene00017163
WBGene00001885	his-11	ZK131.5	ENSG00000274641	HIST1H2BO	2	InParanoid|OrthoInspector		WBGene00017195
WBGene00001889	his-15	ZK131.9	ENSG00000274641	HIST1H2BO	3	InParanoid|OMA|OrthoInspector		WBGene00017241
WBGene00001918	his-44	F08G2.1	ENSG00000274641	HIST1H2BO	2	InParanoid|OrthoInspector		WBGene00017244
WBGene00001885	his-11	ZK131.5	ENSG00000275713	HIST1H2BH	2	InParanoid|OrthoInspector		WBGene00017373
WBGene00001889	his-15	ZK131.9	ENSG00000275713	HIST1H2BH	3	InParanoid|OMA|OrthoInspector		WBGene00017687
WBGene00001918	his-44	F08G2.1	ENSG00000275713	HIST1H2BH	2	InParanoid|OrthoInspector		WBGene00009940
WBGene00001883	his-9	ZK131.3	ENSG00000132475	H3F3B	1	OrthoMCL		WBGene00017866
WBGene00001887	his-13	ZK131.7	ENSG00000132475	H3F3B	1	OrthoMCL		WBGene00018763
WBGene00001899	his-25	ZK131.2	ENSG00000132475	H3F3B	1	OrthoMCL		WBGene00018966
WBGene00001883	his-9	ZK131.3	ENSG00000163041	H3F3A	1	OrthoMCL		WBGene00019615
WBGene00001887	his-13	ZK131.7	ENSG00000163041	H3F3A	1	OrthoMCL		WBGene00019813
WBGene00001899	his-25	ZK131.2	ENSG00000163041	H3F3A	1	OrthoMCL		WBGene00020251
WBGene00001955	hlh-11	F58A4.7	ENSG00000090447	TFAP4	4	Ensembl Compara 87-89|InParanoid|OrthoInspector|OrthoMCL		WBGene00020486
WBGene00019249	None	H28G03.1	ENSG00000122566	HNRNPA2B1	1	Ensembl Compara 87-89		WBGene00020838
WBGene00019249	None	H28G03.1	ENSG00000135486	HNRNPA1	1	Ensembl Compara 87-89		WBGene00020952
WBGene00019249	None	H28G03.1	ENSG00000139675	HNRNPA1L2	1	Ensembl Compara 87-89		WBGene00021371
WBGene00019249	None	H28G03.1	ENSG00000170144	HNRNPA3	1	Ensembl Compara 87-89		WBGene00022175
WBGene00019249	None	H28G03.1	ENSG00000177733	HNRNPA0	1	Ensembl Compara 87-89		WBGene00022201
WBGene00002021	hsp-17	F52E1.7	ENSG00000004776	HSPB6	1	Ensembl Compara 87-89		WBGene00022593
WBGene00002021	hsp-17	F52E1.7	ENSG00000106211	HSPB1	1	Ensembl Compara 87-89		WBGene00000645
WBGene00002021	hsp-17	F52E1.7	ENSG00000109846	CRYAB	1	Ensembl Compara 87-89		WBGene00000716
WBGene00002021	hsp-17	F52E1.7	ENSG00000152137	HSPB8	1	Ensembl Compara 87-89		WBGene00000749
WBGene00002021	hsp-17	F52E1.7	ENSG00000160202	CRYAA	1	Ensembl Compara 87-89		WBGene00000670
WBGene00002021	hsp-17	F52E1.7	ENSG00000169271	HSPB3	1	Ensembl Compara 87-89		WBGene00001483
WBGene00002021	hsp-17	F52E1.7	ENSG00000170276	HSPB2	1	Ensembl Compara 87-89		WBGene00003374
WBGene00002021	hsp-17	F52E1.7	ENSG00000254445	HSPB2-C11orf52	1	Ensembl Compara 87-89		WBGene00003607
WBGene00002021	hsp-17	F52E1.7	ENSG00000276076	None	1	Ensembl Compara 87-89		WBGene00004249
WBGene00002041	hum-8	Y66H1A.6	ENSG00000196586	MYO6	6	Ensembl Compara 87-89|Homologene|InParanoid|OMA|OrthoInspector|OrthoMCL		WBGene00004993
WBGene00002055	ifc-1	F37B4.2	ENSG00000176619	LMNB2	1	Homologene		WBGene00004995
WBGene00018997	None	F57B9.3	ENSG00000156976	EIF4A2	1	Ensembl Compara 87-89		WBGene00007146
WBGene00018997	None	F57B9.3	ENSG00000161960	EIF4A1	1	Ensembl Compara 87-89		WBGene00014137
WBGene00002173	itr-1	F33D4.2	ENSG00000096433	ITPR3	5	Ensembl Compara 87-89|InParanoid|OMA|OrthoInspector|OrthoMCL		WBGene00009306
WBGene00002173	itr-1	F33D4.2	ENSG00000123104	ITPR2	4	Ensembl Compara 87-89|InParanoid|OrthoInspector|OrthoMCL		WBGene00009859
WBGene00002173	itr-1	F33D4.2	ENSG00000150995	ITPR1	6	Ensembl Compara 87-89|Homologene|InParanoid|OMA|OrthoInspector|OrthoMCL		WBGene00011852
WBGene00002199	kin-15	M176.6	ENSG00000060140	STYK1	1	Ensembl Compara 87-89		WBGene00015403
WBGene00006894	ver-1	T17A3.1	ENSG00000060140	STYK1	1	Ensembl Compara 87-89		WBGene00019928
WBGene00011168	None	R09D1.12	ENSG00000060140	STYK1	1	Ensembl Compara 87-89		WBGene00044332
WBGene00021745	None	Y50D4B.6	ENSG00000060140	STYK1	1	Ensembl Compara 87-89		WBGene00022569
WBGene00002215	klc-2	C18C4.10	ENSG00000104892	KLC3	1	Ensembl Compara 87-89		WBGene00016912
WBGene00002215	klc-2	C18C4.10	ENSG00000113971	NPHP3	1	Ensembl Compara 87-89		WBGene00017369
WBGene00002215	klc-2	C18C4.10	ENSG00000126214	KLC1	5	Ensembl Compara 87-89|Homologene|InParanoid|OrthoInspector|OrthoMCL		WBGene00019592
WBGene00002215	klc-2	C18C4.10	ENSG00000137171	KLC4	4	Ensembl Compara 87-89|InParanoid|OrthoInspector|OrthoMCL		WBGene00022615
WBGene00002215	klc-2	C18C4.10	ENSG00000174996	KLC2	5	Ensembl Compara 87-89|InParanoid|OMA|OrthoInspector|OrthoMCL		WBGene00000562
WBGene00002215	klc-2	C18C4.10	ENSG00000256500	None	2	Ensembl Compara 87-89|OrthoInspector		WBGene00004057
WBGene00002215	klc-2	C18C4.10	ENSG00000274810	NPHP3-ACAD11	1	Ensembl Compara 87-89		WBGene00004509
WBGene00002217	klp-4	F56E3.3	ENSG00000137177	KIF13A	6	Ensembl Compara 87-89|Homologene|InParanoid|OMA|OrthoInspector|OrthoMCL		WBGene00008891
WBGene00002217	klp-4	F56E3.3	ENSG00000197892	KIF13B	5	Ensembl Compara 87-89|InParanoid|OMA|OrthoInspector|OrthoMCL		WBGene00012121
WBGene00002249	lap-1	ZK353.6	ENSG00000215440	NPEPL1	6	Ensembl Compara 87-89|Homologene|InParanoid|OMA|OrthoInspector|OrthoMCL		WBGene00012757
WBGene00017948	mth-1	F31D5.5	ENSG00000127507	ADGRE2	1	InParanoid		WBGene00015559
WBGene00017948	mth-1	F31D5.5	ENSG00000173698	ADGRG2	1	InParanoid		WBGene00016997
WBGene00017080	lec-12	DC2.3	ENSG00000116977	LGALS8	1	OrthoInspector		WBGene00019917
WBGene00017080	lec-12	DC2.3	ENSG00000168961	LGALS9	2	Ensembl Compara 87-89|OrthoInspector
WBGene00017080	lec-12	DC2.3	ENSG00000170298	LGALS9B	2	Ensembl Compara 87-89|OrthoInspector
WBGene00017080	lec-12	DC2.3	ENSG00000171916	LGALS9C	2	Ensembl Compara 87-89|OrthoInspector
WBGene00017080	lec-12	DC2.3	ENSG00000178934	LGALS7B	1	Ensembl Compara 87-89
WBGene00017080	lec-12	DC2.3	ENSG00000205076	LGALS7	1	Ensembl Compara 87-89
WBGene00016974	lron-15	C56E6.6	ENSG00000136457	CHAD	1	Ensembl Compara 87-89
WBGene00016974	lron-15	C56E6.6	ENSG00000186105	LRRC70	1	Ensembl Compara 87-89
WBGene00016974	lron-15	C56E6.6	ENSG00000255690	TRIL	1	Ensembl Compara 87-89
WBGene00007944	None	C34F6.10	ENSG00000075420	FNDC3B	2	Ensembl Compara 87-89|InParanoid
WBGene00007944	None	C34F6.10	ENSG00000102531	FNDC3A	2	Ensembl Compara 87-89|InParanoid
WBGene00002999	lin-10	C09H6.2	ENSG00000011132	APBA3	2	Ensembl Compara 87-89|OrthoInspector
WBGene00002999	lin-10	C09H6.2	ENSG00000034053	APBA2	3	Ensembl Compara 87-89|OrthoInspector|OrthoMCL
WBGene00002999	lin-10	C09H6.2	ENSG00000107282	APBA1	3	Ensembl Compara 87-89|OrthoInspector|OrthoMCL
WBGene00003597	nhl-1	F54G8.4	ENSG00000206557	TRIM71	1	OrthoMCL
WBGene00009895	scl-2	F49E11.10	ENSG00000096006	CRISP3	3	Ensembl Compara 87-89|InParanoid|OrthoInspector
WBGene00009895	scl-2	F49E11.10	ENSG00000101074	R3HDML	2	Ensembl Compara 87-89|OrthoInspector
WBGene00009895	scl-2	F49E11.10	ENSG00000103196	CRISPLD2	2	Ensembl Compara 87-89|OrthoInspector
WBGene00009895	scl-2	F49E11.10	ENSG00000121005	CRISPLD1	2	Ensembl Compara 87-89|OrthoInspector
WBGene00009895	scl-2	F49E11.10	ENSG00000124490	CRISP2	3	Ensembl Compara 87-89|InParanoid|OrthoInspector
WBGene00009895	scl-2	F49E11.10	ENSG00000124812	CRISP1	2	Ensembl Compara 87-89|InParanoid
WBGene00009895	scl-2	F49E11.10	ENSG00000137558	PI15	2	Ensembl Compara 87-89|OrthoInspector
WBGene00009895	scl-2	F49E11.10	ENSG00000139278	GLIPR1	3	Ensembl Compara 87-89|InParanoid|OrthoInspector
WBGene00009895	scl-2	F49E11.10	ENSG00000140839	CLEC18B	1	Ensembl Compara 87-89
WBGene00009895	scl-2	F49E11.10	ENSG00000157322	CLEC18A	1	Ensembl Compara 87-89
WBGene00009895	scl-2	F49E11.10	ENSG00000157335	CLEC18C	1	Ensembl Compara 87-89
WBGene00009895	scl-2	F49E11.10	ENSG00000164530	PI16	2	Ensembl Compara 87-89|OrthoInspector
WBGene00009895	scl-2	F49E11.10	ENSG00000173401	GLIPR1L1	2	Ensembl Compara 87-89|OrthoInspector
WBGene00009895	scl-2	F49E11.10	ENSG00000180481	GLIPR1L2	1	Ensembl Compara 87-89
WBGene00003149	mbk-1	T04C10.1	ENSG00000105204	DYRK1B	4	Ensembl Compara 87-89|InParanoid|OrthoInspector|OrthoMCL
WBGene00003149	mbk-1	T04C10.1	ENSG00000157540	DYRK1A	4	Ensembl Compara 87-89|InParanoid|OrthoInspector|OrthoMCL
WBGene00009058	None	F22E12.1	ENSG00000003436	TFPI	1	Ensembl Compara 87-89
WBGene00009058	None	F22E12.1	ENSG00000127578	WFIKKN1	1	Ensembl Compara 87-89
WBGene00009058	None	F22E12.1	ENSG00000173714	WFIKKN2	1	Ensembl Compara 87-89
WBGene00006063	sto-1	F08C6.4	ENSG00000116218	NPHS2	1	Ensembl Compara 87-89
WBGene00006063	sto-1	F08C6.4	ENSG00000133115	STOML3	2	Ensembl Compara 87-89|OrthoMCL
WBGene00006063	sto-1	F08C6.4	ENSG00000148175	STOM	2	Ensembl Compara 87-89|OrthoMCL
WBGene00009058	None	F22E12.1	ENSG00000101446	SPINT3	1	Ensembl Compara 87-89
WBGene00009058	None	F22E12.1	ENSG00000105825	TFPI2	1	Ensembl Compara 87-89
WBGene00006533	tba-7	T28D6.2	ENSG00000123416	TUBA1B	1	OrthoMCL
WBGene00006533	tba-7	T28D6.2	ENSG00000127824	TUBA4A	1	OrthoMCL
WBGene00006533	tba-7	T28D6.2	ENSG00000167552	TUBA1A	1	OrthoMCL
WBGene00006533	tba-7	T28D6.2	ENSG00000167553	TUBA1C	1	OrthoMCL
WBGene00003243	mig-10	F10E9.6	ENSG00000077420	APBB1IP	2	Ensembl Compara 87-89|OrthoInspector
WBGene00003243	mig-10	F10E9.6	ENSG00000106070	GRB10	1	Ensembl Compara 87-89
WBGene00003243	mig-10	F10E9.6	ENSG00000115290	GRB14	1	Ensembl Compara 87-89
WBGene00003243	mig-10	F10E9.6	ENSG00000141738	GRB7	1	Ensembl Compara 87-89
WBGene00003243	mig-10	F10E9.6	ENSG00000173166	RAPH1	4	Ensembl Compara 87-89|InParanoid|OrthoInspector|OrthoMCL
WBGene00004859	sma-5	W06B3.2	ENSG00000166484	MAPK7	1	Ensembl Compara 87-89
WBGene00003411	mrp-5	F14F4.3	ENSG00000114770	ABCC5	6	Ensembl Compara 87-89|Homologene|InParanoid|OMA|OrthoInspector|OrthoMCL
WBGene00003412	mrp-6	F20B6.3	ENSG00000114770	ABCC5	1	OrthoMCL
WBGene00003411	mrp-5	F14F4.3	ENSG00000121270	ABCC11	4	Ensembl Compara 87-89|InParanoid|OrthoInspector|OrthoMCL
WBGene00003412	mrp-6	F20B6.3	ENSG00000121270	ABCC11	1	OrthoMCL
WBGene00003411	mrp-5	F14F4.3	ENSG00000140798	ABCC12	4	Ensembl Compara 87-89|InParanoid|OrthoInspector|OrthoMCL
WBGene00003412	mrp-6	F20B6.3	ENSG00000140798	ABCC12	1	OrthoMCL
WBGene00003412	mrp-6	F20B6.3	ENSG00000001626	CFTR	1	Ensembl Compara 87-89
WBGene00003412	mrp-6	F20B6.3	ENSG00000125257	ABCC4	4	Ensembl Compara 87-89|Homologene|OMA|OrthoMCL
WBGene00003411	mrp-5	F14F4.3	ENSG00000125257	ABCC4	1	OrthoMCL
WBGene00012726	None	Y39G8B.5	ENSG00000085511	MAP3K4	1	Ensembl Compara 87-89
WBGene00003519	nac-3	K08E5.2	ENSG00000007216	SLC13A2	6	Ensembl Compara 87-89|Homologene|InParanoid|OMA|OrthoInspector|OrthoMCL
WBGene00003519	nac-3	K08E5.2	ENSG00000081800	SLC13A1	3	Ensembl Compara 87-89|InParanoid|OrthoInspector
WBGene00003519	nac-3	K08E5.2	ENSG00000141485	SLC13A5	4	Ensembl Compara 87-89|InParanoid|OrthoInspector|OrthoMCL
WBGene00003519	nac-3	K08E5.2	ENSG00000158296	SLC13A3	4	Ensembl Compara 87-89|InParanoid|OMA|OrthoInspector
WBGene00003519	nac-3	K08E5.2	ENSG00000164707	SLC13A4	3	Ensembl Compara 87-89|InParanoid|OrthoInspector
WBGene00003555	nas-39	F38E9.2	ENSG00000038295	TLL1	6	Ensembl Compara 87-89|Homologene|InParanoid|OMA|OrthoInspector|OrthoMCL
WBGene00003555	nas-39	F38E9.2	ENSG00000095587	TLL2	4	Ensembl Compara 87-89|InParanoid|OrthoInspector|OrthoMCL
WBGene00003555	nas-39	F38E9.2	ENSG00000106333	PCOLCE	1	Ensembl Compara 87-89
WBGene00003555	nas-39	F38E9.2	ENSG00000163710	PCOLCE2	1	Ensembl Compara 87-89
WBGene00003555	nas-39	F38E9.2	ENSG00000168487	BMP1	4	Ensembl Compara 87-89|InParanoid|OrthoInspector|OrthoMCL
WBGene00003564	ncs-2	F10G8.5	ENSG00000048545	GUCA1A	1	Ensembl Compara 87-89
WBGene00003564	ncs-2	F10G8.5	ENSG00000112599	GUCA1B	1	Ensembl Compara 87-89
WBGene00003564	ncs-2	F10G8.5	ENSG00000138472	GUCA1C	1	Ensembl Compara 87-89
WBGene00003567	ncx-2	C10G8.5	ENSG00000100678	SLC8A3	6	Ensembl Compara 87-89|Homologene|InParanoid|OMA|OrthoInspector|OrthoMCL
WBGene00003567	ncx-2	C10G8.5	ENSG00000118160	SLC8A2	5	Ensembl Compara 87-89|InParanoid|OMA|OrthoInspector|OrthoMCL
WBGene00003567	ncx-2	C10G8.5	ENSG00000164199	ADGRV1	1	Ensembl Compara 87-89
WBGene00003567	ncx-2	C10G8.5	ENSG00000183023	SLC8A1	5	Ensembl Compara 87-89|InParanoid|OMA|OrthoInspector|OrthoMCL
WBGene00003583	ndx-6	EEED8.8	ENSG00000170502	NUDT9	6	Ensembl Compara 87-89|Homologene|InParanoid|OMA|OrthoInspector|OrthoMCL
WBGene00003597	nhl-1	F54G8.4	ENSG00000169871	TRIM56	1	Ensembl Compara 87-89
WBGene00003597	nhl-1	F54G8.4	ENSG00000109654	TRIM2	1	InParanoid
WBGene00003597	nhl-1	F54G8.4	ENSG00000110171	TRIM3	1	InParanoid
WBGene00003621	nhr-22	K06A1.4	ENSG00000136931	NR5A1	1	OMA
WBGene00003730	nhx-2	B0495.4	ENSG00000066230	SLC9A3	3	Ensembl Compara 87-89|OrthoInspector|OrthoMCL
WBGene00003730	nhx-2	B0495.4	ENSG00000090020	SLC9A1	3	Ensembl Compara 87-89|OrthoInspector|OrthoMCL
WBGene00003730	nhx-2	B0495.4	ENSG00000115616	SLC9A2	3	Ensembl Compara 87-89|OrthoInspector|OrthoMCL
WBGene00003730	nhx-2	B0495.4	ENSG00000135740	SLC9A5	3	Ensembl Compara 87-89|OrthoInspector|OrthoMCL
WBGene00003730	nhx-2	B0495.4	ENSG00000180251	SLC9A4	2	Ensembl Compara 87-89|OrthoMCL
WBGene00021983	npr-5	Y58G8A.4	ENSG00000119973	PRLHR	1	Ensembl Compara 87-89
WBGene00018764	None	F53F10.2	ENSG00000115758	ODC1	1	Ensembl Compara 87-89
WBGene00018764	None	F53F10.2	ENSG00000142920	AZIN2	1	Ensembl Compara 87-89
WBGene00018764	None	F53F10.2	ENSG00000155096	AZIN1	1	Ensembl Compara 87-89
WBGene00003903	pab-2	F18H3.3	ENSG00000070756	PABPC1	5	Ensembl Compara 87-89|Homologene|InParanoid|OrthoInspector|OrthoMCL
WBGene00003903	pab-2	F18H3.3	ENSG00000090621	PABPC4	4	Ensembl Compara 87-89|InParanoid|OrthoInspector|OrthoMCL
WBGene00003903	pab-2	F18H3.3	ENSG00000101104	PABPC1L	4	Ensembl Compara 87-89|InParanoid|OrthoInspector|OrthoMCL
WBGene00003903	pab-2	F18H3.3	ENSG00000151846	PABPC3	4	Ensembl Compara 87-89|InParanoid|OrthoInspector|OrthoMCL
WBGene00003903	pab-2	F18H3.3	ENSG00000174740	PABPC5	1	Ensembl Compara 87-89
WBGene00003903	pab-2	F18H3.3	ENSG00000184388	PABPC1L2B	1	Ensembl Compara 87-89
WBGene00003903	pab-2	F18H3.3	ENSG00000186288	PABPC1L2A	1	Ensembl Compara 87-89
WBGene00003903	pab-2	F18H3.3	ENSG00000254535	PABPC4L	1	Ensembl Compara 87-89
WBGene00022801	pcp-5	ZK688.6	ENSG00000137509	PRCP	6	Ensembl Compara 87-89|Homologene|InParanoid|OMA|OrthoInspector|OrthoMCL
WBGene00017592	None	F19C7.2	ENSG00000112812	PRSS16	4	Ensembl Compara 87-89|InParanoid|OrthoInspector|OrthoMCL
WBGene00044302	None	F28E10.5	ENSG00000112812	PRSS16	1	Ensembl Compara 87-89
WBGene00015752	None	C14B9.2	ENSG00000185624	P4HB	1	OrthoMCL
WBGene00015752	None	C14B9.2	ENSG00000167004	PDIA3	1	OrthoMCL
WBGene00003980	pes-7	F09C3.1	ENSG00000140575	IQGAP1	5	Ensembl Compara 87-89|InParanoid|OMA|OrthoInspector|OrthoMCL
WBGene00003980	pes-7	F09C3.1	ENSG00000145703	IQGAP2	5	Ensembl Compara 87-89|InParanoid|OMA|OrthoInspector|OrthoMCL
WBGene00003980	pes-7	F09C3.1	ENSG00000183856	IQGAP3	6	Ensembl Compara 87-89|Homologene|InParanoid|OMA|OrthoInspector|OrthoMCL
WBGene00003995	pgp-1	K08E7.9	ENSG00000004846	ABCB5	2	Ensembl Compara 87-89|OrthoMCL
WBGene00004002	pgp-8	T21E8.3	ENSG00000004846	ABCB5	1	OrthoMCL
WBGene00003995	pgp-1	K08E7.9	ENSG00000005471	ABCB4	4	Ensembl Compara 87-89|InParanoid|OrthoInspector|OrthoMCL
WBGene00004002	pgp-8	T21E8.3	ENSG00000005471	ABCB4	1	OrthoMCL
WBGene00003995	pgp-1	K08E7.9	ENSG00000073734	ABCB11	4	Ensembl Compara 87-89|InParanoid|OrthoInspector|OrthoMCL
WBGene00004002	pgp-8	T21E8.3	ENSG00000073734	ABCB11	1	OrthoMCL
WBGene00003995	pgp-1	K08E7.9	ENSG00000085563	ABCB1	5	Ensembl Compara 87-89|Homologene|InParanoid|OrthoInspector|OrthoMCL
WBGene00004002	pgp-8	T21E8.3	ENSG00000085563	ABCB1	1	OrthoMCL
WBGene00020471	pho-14	T13B5.3	ENSG00000014257	ACPP	2	Ensembl Compara 87-89|OrthoMCL
WBGene00018696	pho-6	F52E1.8	ENSG00000014257	ACPP	1	Homologene
WBGene00020471	pho-14	T13B5.3	ENSG00000134575	ACP2	3	Ensembl Compara 87-89|OMA|OrthoMCL
WBGene00020471	pho-14	T13B5.3	ENSG00000142513	ACPT	2	Ensembl Compara 87-89|OMA
WBGene00004053	tank-1	ZK1005.1	ENSG00000129484	PARP2	1	Ensembl Compara 87-89
WBGene00004052	parg-2	H23L24.5	ENSG00000227345	PARG	3	Ensembl Compara 87-89|OrthoInspector|OrthoMCL
WBGene00004058	pmp-1	C44B7.8	ENSG00000117528	ABCD3	5	Ensembl Compara 87-89|Homologene|InParanoid|OrthoInspector|OrthoMCL
WBGene00004058	pmp-1	C44B7.8	ENSG00000119688	ABCD4	1	OrthoMCL
WBGene00004058	pmp-1	C44B7.8	ENSG00000101986	ABCD1	1	OrthoMCL
WBGene00004058	pmp-1	C44B7.8	ENSG00000173208	ABCD2	1	OrthoMCL
WBGene00012131	None	T28F3.5	ENSG00000076555	ACACB	4	Ensembl Compara 87-89|OMA|OrthoInspector|OrthoMCL
WBGene00012131	None	T28F3.5	ENSG00000278540	ACACA	2	Ensembl Compara 87-89|OrthoInspector
WBGene00004135	pqn-48	K07D4.8	ENSG00000216490	IFI30	3	Ensembl Compara 87-89|OrthoInspector|OrthoMCL
WBGene00004184	None	T19D2.2	ENSG00000112245	PTP4A1	6	Ensembl Compara 87-89|Homologene|InParanoid|OMA|OrthoInspector|OrthoMCL
WBGene00004184	None	T19D2.2	ENSG00000184007	PTP4A2	5	Ensembl Compara 87-89|InParanoid|OMA|OrthoInspector|OrthoMCL
WBGene00004184	None	T19D2.2	ENSG00000184489	PTP4A3	4	Ensembl Compara 87-89|InParanoid|OrthoInspector|OrthoMCL
WBGene00004316	rbf-1	F37A4.7	ENSG00000089169	RPH3A	5	Ensembl Compara 87-89|Homologene|OMA|OrthoInspector|OrthoMCL
WBGene00004316	rbf-1	F37A4.7	ENSG00000149927	DOC2A	2	Ensembl Compara 87-89|OrthoInspector
WBGene00004316	rbf-1	F37A4.7	ENSG00000272636	DOC2B	2	Ensembl Compara 87-89|OrthoInspector
WBGene00004321	rcan-1	F54E7.7	ENSG00000117602	RCAN3	5	Ensembl Compara 87-89|Homologene|InParanoid|OMA|OrthoInspector
WBGene00004321	rcan-1	F54E7.7	ENSG00000159200	RCAN1	5	Ensembl Compara 87-89|InParanoid|OMA|OrthoInspector|OrthoMCL
WBGene00004321	rcan-1	F54E7.7	ENSG00000172348	RCAN2	4	Ensembl Compara 87-89|InParanoid|OMA|OrthoInspector
WBGene00004368	ric-19	C32E8.7	ENSG00000003147	ICA1	4	Ensembl Compara 87-89|InParanoid|OrthoInspector|OrthoMCL
WBGene00004368	ric-19	C32E8.7	ENSG00000163596	ICA1L	5	Ensembl Compara 87-89|InParanoid|OMA|OrthoInspector|OrthoMCL
WBGene00004393	rnt-1	B0414.2	ENSG00000020633	RUNX3	3	Ensembl Compara 87-89|InParanoid|OrthoInspector
WBGene00004393	rnt-1	B0414.2	ENSG00000124813	RUNX2	4	Ensembl Compara 87-89|InParanoid|OrthoInspector|OrthoMCL
WBGene00004393	rnt-1	B0414.2	ENSG00000159216	RUNX1	3	Ensembl Compara 87-89|InParanoid|OrthoInspector
WBGene00004402	rom-3	Y116A8C.14	ENSG00000007384	RHBDF1	4	Ensembl Compara 87-89|InParanoid|OrthoInspector|OrthoMCL
WBGene00004402	rom-3	Y116A8C.14	ENSG00000129667	RHBDF2	5	Ensembl Compara 87-89|Homologene|InParanoid|OrthoInspector|OrthoMCL
WBGene00004457	rpm-1	C01B7.6	ENSG00000005810	MYCBP2	6	Ensembl Compara 87-89|Homologene|InParanoid|OMA|OrthoInspector|OrthoMCL
WBGene00004735	sbp-1	Y47D3B.7	ENSG00000072310	SREBF1	5	Ensembl Compara 87-89|InParanoid|OMA|OrthoInspector|OrthoMCL
WBGene00004735	sbp-1	Y47D3B.7	ENSG00000198911	SREBF2	5	Ensembl Compara 87-89|InParanoid|OMA|OrthoInspector|OrthoMCL
WBGene00004809	skr-3	F44G3.6	ENSG00000113558	SKP1	1	Ensembl Compara 87-89
WBGene00004810	skr-4	Y60A3A.18	ENSG00000113558	SKP1	1	Ensembl Compara 87-89
WBGene00004811	skr-5	F47H4.10	ENSG00000113558	SKP1	1	Ensembl Compara 87-89
WBGene00004809	skr-3	F44G3.6	ENSG00000272772	None	1	Ensembl Compara 87-89
WBGene00004810	skr-4	Y60A3A.18	ENSG00000272772	None	1	Ensembl Compara 87-89
WBGene00004811	skr-5	F47H4.10	ENSG00000272772	None	1	Ensembl Compara 87-89
WBGene00004900	snf-1	W03G9.1	ENSG00000063127	SLC6A16	1	Ensembl Compara 87-89
WBGene00004900	snf-1	W03G9.1	ENSG00000072041	SLC6A15	1	Ensembl Compara 87-89
WBGene00004900	snf-1	W03G9.1	ENSG00000130821	SLC6A8	1	Ensembl Compara 87-89
WBGene00004900	snf-1	W03G9.1	ENSG00000163817	SLC6A20	1	Ensembl Compara 87-89
WBGene00004900	snf-1	W03G9.1	ENSG00000164363	SLC6A18	1	Ensembl Compara 87-89
WBGene00004900	snf-1	W03G9.1	ENSG00000174358	SLC6A19	1	Ensembl Compara 87-89
WBGene00004900	snf-1	W03G9.1	ENSG00000197106	SLC6A17	1	Ensembl Compara 87-89
WBGene00006063	sto-1	F08C6.4	ENSG00000165283	STOML2	1	OrthoMCL
WBGene00006351	sur-5	K03A1.5	ENSG00000081760	AACS	6	Ensembl Compara 87-89|Homologene|InParanoid|OMA|OrthoInspector|OrthoMCL
WBGene00015540	sams-4	C06E7.3	ENSG00000151224	MAT1A	5	Ensembl Compara 87-89|InParanoid|OMA|OrthoInspector|OrthoMCL
WBGene00015540	sams-4	C06E7.3	ENSG00000168906	MAT2A	6	Ensembl Compara 87-89|Homologene|InParanoid|OMA|OrthoInspector|OrthoMCL
WBGene00006527	tax-6	C02F4.2	ENSG00000107758	PPP3CB	5	Ensembl Compara 87-89|InParanoid|OMA|OrthoInspector|OrthoMCL
WBGene00006527	tax-6	C02F4.2	ENSG00000120910	PPP3CC	4	Ensembl Compara 87-89|InParanoid|OrthoInspector|OrthoMCL
WBGene00006527	tax-6	C02F4.2	ENSG00000138814	PPP3CA	6	Ensembl Compara 87-89|Homologene|InParanoid|OMA|OrthoInspector|OrthoMCL
WBGene00006533	tba-7	T28D6.2	ENSG00000178462	TUBAL3	1	OrthoMCL
WBGene00006608	tre-2	T05A12.2	ENSG00000118094	TREH	2	Ensembl Compara 87-89|OrthoMCL
WBGene00006609	tre-3	W05E10.4	ENSG00000118094	TREH	6	Ensembl Compara 87-89|Homologene|InParanoid|OMA|OrthoInspector|OrthoMCL
WBGene00006718	ubc-23	C28G1.1	ENSG00000185104	FAF1	2	Ensembl Compara 87-89|OrthoMCL
WBGene00019832	osg-1	R02F2.2	ENSG00000138834	MAPK8IP3	1	Ensembl Compara 87-89
WBGene00006810	unc-78	C04F6.4	ENSG00000071127	WDR1	6	Ensembl Compara 87-89|Homologene|InParanoid|OMA|OrthoInspector|OrthoMCL
WBGene00002217	klp-4	F56E3.3	ENSG00000054523	KIF1B	1	OrthoMCL
WBGene00002217	klp-4	F56E3.3	ENSG00000129250	KIF1C	1	OrthoMCL
WBGene00002217	klp-4	F56E3.3	ENSG00000130294	KIF1A	1	OrthoMCL
WBGene00006923	vhp-1	F08B1.1	ENSG00000111266	DUSP16	3	Ensembl Compara 87-89|InParanoid|OrthoInspector
WBGene00006923	vhp-1	F08B1.1	ENSG00000184545	DUSP8	4	Ensembl Compara 87-89|InParanoid|OrthoInspector|OrthoMCL
WBGene00013869	None	ZC373.4	ENSG00000126562	WNK4	1	OMA
WBGene00006959	xbp-1	R74.3	ENSG00000100219	XBP1	2	Ensembl Compara 87-89|OrthoInspector
WBGene00006971	zak-1	R13F6.6	ENSG00000172680	MOS	1	Ensembl Compara 87-89
WBGene00007010	alx-1	R10E12.1	ENSG00000170248	PDCD6IP	6	Ensembl Compara 87-89|Homologene|InParanoid|OMA|OrthoInspector|OrthoMCL
WBGene00019986	None	R09F10.1	ENSG00000174080	CTSF	1	OrthoMCL
WBGene00008265	kcnl-4	C53A5.5	ENSG00000080709	KCNN2	1	Ensembl Compara 87-89
WBGene00008265	kcnl-4	C53A5.5	ENSG00000104783	KCNN4	1	Ensembl Compara 87-89
WBGene00008265	kcnl-4	C53A5.5	ENSG00000105642	KCNN1	1	Ensembl Compara 87-89
WBGene00008265	kcnl-4	C53A5.5	ENSG00000143603	KCNN3	1	Ensembl Compara 87-89
WBGene00019869	cnnm-2	R04E5.2	ENSG00000148842	CNNM2	2	OrthoInspector|OrthoMCL
WBGene00019869	cnnm-2	R04E5.2	ENSG00000168763	CNNM3	1	OrthoInspector
WBGene00017428	None	F13D11.3	ENSG00000167065	DUSP18	2	Ensembl Compara 87-89|OMA
WBGene00017428	None	F13D11.3	ENSG00000189037	DUSP21	2	Ensembl Compara 87-89|OMA
WBGene00017428	None	F13D11.3	ENSG00000276023	DUSP14	1	Ensembl Compara 87-89
WBGene00015632	None	C09D4.1	ENSG00000169026	MFSD7	1	OrthoMCL
WBGene00017969	None	F32A5.3	ENSG00000064601	CTSA	1	Ensembl Compara 87-89
WBGene00012251	clec-49	W04E12.6	ENSG00000011028	MRC2	1	Ensembl Compara 87-89
WBGene00012253	clec-50	W04E12.8	ENSG00000011028	MRC2	2	Ensembl Compara 87-89|OrthoInspector
WBGene00015050	clec-51	B0218.6	ENSG00000011028	MRC2	1	Ensembl Compara 87-89
WBGene00012251	clec-49	W04E12.6	ENSG00000054219	LY75	1	Ensembl Compara 87-89
WBGene00012253	clec-50	W04E12.8	ENSG00000054219	LY75	2	Ensembl Compara 87-89|OrthoInspector
WBGene00015050	clec-51	B0218.6	ENSG00000054219	LY75	1	Ensembl Compara 87-89
WBGene00012251	clec-49	W04E12.6	ENSG00000153246	PLA2R1	1	Ensembl Compara 87-89
WBGene00012253	clec-50	W04E12.8	ENSG00000153246	PLA2R1	2	Ensembl Compara 87-89|OrthoInspector
WBGene00015050	clec-51	B0218.6	ENSG00000153246	PLA2R1	1	Ensembl Compara 87-89
WBGene00012251	clec-49	W04E12.6	ENSG00000248672	LY75-CD302	1	Ensembl Compara 87-89
WBGene00012253	clec-50	W04E12.8	ENSG00000248672	LY75-CD302	1	Ensembl Compara 87-89
WBGene00015050	clec-51	B0218.6	ENSG00000248672	LY75-CD302	1	Ensembl Compara 87-89
WBGene00012251	clec-49	W04E12.6	ENSG00000260314	MRC1	1	Ensembl Compara 87-89
WBGene00012253	clec-50	W04E12.8	ENSG00000260314	MRC1	2	Ensembl Compara 87-89|OrthoInspector
WBGene00015050	clec-51	B0218.6	ENSG00000260314	MRC1	1	Ensembl Compara 87-89
WBGene00007694	None	C23H4.6	ENSG00000163029	SMC6	5	Ensembl Compara 87-89|InParanoid|OMA|OrthoInspector|OrthoMCL
WBGene00016507	abhd-5.2	C37H5.3	ENSG00000011198	ABHD5	5	Ensembl Compara 87-89|InParanoid|OMA|OrthoInspector|OrthoMCL
WBGene00016507	abhd-5.2	C37H5.3	ENSG00000100439	ABHD4	6	Ensembl Compara 87-89|Homologene|InParanoid|OMA|OrthoInspector|OrthoMCL
WBGene00007750	syg-2	C26G2.1	ENSG00000161270	NPHS1	5	Ensembl Compara 87-89|InParanoid|OMA|OrthoInspector|OrthoMCL
WBGene00009531	None	F38B2.4	ENSG00000106992	AK1	6	Ensembl Compara 87-89|Homologene|InParanoid|OMA|OrthoInspector|OrthoMCL
WBGene00009531	None	F38B2.4	ENSG00000154027	AK5	1	Ensembl Compara 87-89
WBGene00009531	None	F38B2.4	ENSG00000162368	CMPK1	1	OrthoMCL
WBGene00019349	trx-5	K02H11.6	ENSG00000130045	NXNL2	5	Ensembl Compara 87-89|Homologene|InParanoid|OMA|OrthoMCL
WBGene00020613	None	T20D4.7	ENSG00000130045	NXNL2	4	Ensembl Compara 87-89|Homologene|InParanoid|OrthoMCL
WBGene00020875	None	T28A11.13	ENSG00000130045	NXNL2	4	Ensembl Compara 87-89|Homologene|InParanoid|OMA
WBGene00019349	trx-5	K02H11.6	ENSG00000167693	NXN	3	Ensembl Compara 87-89|OrthoInspector|OrthoMCL
WBGene00020613	None	T20D4.7	ENSG00000167693	NXN	3	Ensembl Compara 87-89|OrthoInspector|OrthoMCL
WBGene00020875	None	T28A11.13	ENSG00000167693	NXN	2	Ensembl Compara 87-89|OrthoInspector
WBGene00019349	trx-5	K02H11.6	ENSG00000171773	NXNL1	1	Ensembl Compara 87-89
WBGene00020613	None	T20D4.7	ENSG00000171773	NXNL1	1	Ensembl Compara 87-89
WBGene00020875	None	T28A11.13	ENSG00000171773	NXNL1	1	Ensembl Compara 87-89
WBGene00007836	None	C31C9.2	ENSG00000092621	PHGDH	5	Ensembl Compara 87-89|Homologene|InParanoid|OrthoInspector|OrthoMCL
WBGene00007857	None	C31H5.6	ENSG00000119673	ACOT2	5	Ensembl Compara 87-89|InParanoid|OMA|OrthoInspector|OrthoMCL
WBGene00020989	None	W03D8.8	ENSG00000119673	ACOT2	4	Ensembl Compara 87-89|InParanoid|OMA|OrthoInspector
WBGene00007857	None	C31H5.6	ENSG00000136881	BAAT	4	Ensembl Compara 87-89|InParanoid|OrthoInspector|OrthoMCL
WBGene00020989	None	W03D8.8	ENSG00000136881	BAAT	3	Ensembl Compara 87-89|InParanoid|OrthoInspector
WBGene00007857	None	C31H5.6	ENSG00000177465	ACOT4	4	Ensembl Compara 87-89|InParanoid|OMA|OrthoInspector
WBGene00020989	None	W03D8.8	ENSG00000177465	ACOT4	5	Ensembl Compara 87-89|InParanoid|OMA|OrthoInspector|OrthoMCL
WBGene00007857	None	C31H5.6	ENSG00000184227	ACOT1	5	Ensembl Compara 87-89|InParanoid|OMA|OrthoInspector|OrthoMCL
WBGene00020989	None	W03D8.8	ENSG00000184227	ACOT1	4	Ensembl Compara 87-89|InParanoid|OMA|OrthoInspector
WBGene00007857	None	C31H5.6	ENSG00000205669	ACOT6	1	Ensembl Compara 87-89
WBGene00020989	None	W03D8.8	ENSG00000205669	ACOT6	1	Ensembl Compara 87-89
WBGene00008018	tbc-8	C38H2.1	ENSG00000141258	SGSM2	5	Ensembl Compara 87-89|InParanoid|OMA|OrthoInspector|OrthoMCL
WBGene00008018	tbc-8	C38H2.1	ENSG00000167037	SGSM1	6	Ensembl Compara 87-89|Homologene|InParanoid|OMA|OrthoInspector|OrthoMCL
WBGene00021176	None	Y9C9A.1	ENSG00000182853	VMO1	4	Ensembl Compara 87-89|InParanoid|OrthoInspector|OrthoMCL
WBGene00019314	None	K02E7.10	ENSG00000256043	CTSO	1	Ensembl Compara 87-89
WBGene00019986	None	R09F10.1	ENSG00000256043	CTSO	1	Ensembl Compara 87-89
WBGene00022189	None	Y71H2AR.2	ENSG00000256043	CTSO	1	Ensembl Compara 87-89
WBGene00044760	None	Y71H2AM.25	ENSG00000256043	CTSO	1	Ensembl Compara 87-89
WBGene00020004	None	R11E3.2	ENSG00000213901	SLC23A3	1	Ensembl Compara 87-89
WBGene00008267	None	C53A5.9	ENSG00000162873	KLHDC8A	1	Ensembl Compara 87-89
WBGene00008269	None	C53A5.11	ENSG00000162873	KLHDC8A	1	Ensembl Compara 87-89
WBGene00008267	None	C53A5.9	ENSG00000185909	KLHDC8B	1	Ensembl Compara 87-89
WBGene00008269	None	C53A5.11	ENSG00000185909	KLHDC8B	1	Ensembl Compara 87-89
WBGene00008267	None	C53A5.9	ENSG00000261609	GAN	1	Ensembl Compara 87-89
WBGene00008269	None	C53A5.11	ENSG00000261609	GAN	1	Ensembl Compara 87-89
WBGene00015955	None	C18B2.4	ENSG00000132471	WBP2	5	Ensembl Compara 87-89|InParanoid|OMA|OrthoInspector|OrthoMCL
WBGene00015955	None	C18B2.4	ENSG00000183066	WBP2NL	2	Ensembl Compara 87-89|OrthoInspector
WBGene00011486	None	T05E12.3	ENSG00000151364	KCTD14	1	Ensembl Compara 87-89
WBGene00017705	None	F22E5.6	ENSG00000151364	KCTD14	1	Ensembl Compara 87-89
WBGene00022570	sdz-35	ZC239.12	ENSG00000151364	KCTD14	1	Ensembl Compara 87-89
WBGene00022572	None	ZC239.14	ENSG00000151364	KCTD14	1	Ensembl Compara 87-89
WBGene00011486	None	T05E12.3	ENSG00000243335	KCTD7	2	Ensembl Compara 87-89|InParanoid
WBGene00017705	None	F22E5.6	ENSG00000243335	KCTD7	2	Ensembl Compara 87-89|InParanoid
WBGene00022570	sdz-35	ZC239.12	ENSG00000243335	KCTD7	2	Ensembl Compara 87-89|InParanoid
WBGene00022572	None	ZC239.14	ENSG00000243335	KCTD7	2	Ensembl Compara 87-89|InParanoid
WBGene00008476	None	E03H4.8	ENSG00000144451	SPAG16	1	Ensembl Compara 87-89
WBGene00008476	None	E03H4.8	ENSG00000184432	COPB2	1	Ensembl Compara 87-89
WBGene00011076	scav-5	R07B1.3	ENSG00000073060	SCARB1	2	Ensembl Compara 87-89|OMA
WBGene00011076	scav-5	R07B1.3	ENSG00000135218	CD36	1	Ensembl Compara 87-89
WBGene00011076	scav-5	R07B1.3	ENSG00000138760	SCARB2	1	Ensembl Compara 87-89
WBGene00020895	None	T28D9.3	ENSG00000067113	PLPP1	1	Ensembl Compara 87-89
WBGene00020895	None	T28D9.3	ENSG00000141934	PLPP2	1	Ensembl Compara 87-89
WBGene00020895	None	T28D9.3	ENSG00000162407	PLPP3	1	Ensembl Compara 87-89
WBGene00219316	None	F21A3.11	ENSG00000183760	ACP7	4	Ensembl Compara 87-89|Homologene|InParanoid|OrthoInspector
WBGene00014001	pyk-2	ZK593.1	ENSG00000067225	PKM	5	Ensembl Compara 87-89|Homologene|OMA|OrthoInspector|OrthoMCL
WBGene00014001	pyk-2	ZK593.1	ENSG00000143627	PKLR	3	Ensembl Compara 87-89|OrthoInspector|OrthoMCL
WBGene00009162	None	F26E4.7	ENSG00000120708	TGFBI	2	Ensembl Compara 87-89|OrthoInspector
WBGene00009162	None	F26E4.7	ENSG00000133110	POSTN	2	Ensembl Compara 87-89|OrthoInspector
WBGene00009192	None	F27E5.1	ENSG00000104763	ASAH1	1	Ensembl Compara 87-89
WBGene00018488	acs-1	F46E10.1	ENSG00000167107	ACSF2	5	Ensembl Compara 87-89|Homologene|InParanoid|OrthoInspector|OrthoMCL
WBGene00022499	set-30	ZC8.3	ENSG00000115593	SMYD1	2	Ensembl Compara 87-89|OrthoInspector
WBGene00022499	set-30	ZC8.3	ENSG00000143499	SMYD2	3	Ensembl Compara 87-89|OMA|OrthoInspector
WBGene00022499	set-30	ZC8.3	ENSG00000185420	SMYD3	3	Ensembl Compara 87-89|Homologene|OrthoInspector
WBGene00010904	ugt-62	M88.1	ENSG00000109181	UGT2B10	3	InParanoid|OrthoInspector|OrthoMCL
WBGene00015965	ugt-48	C18C4.3	ENSG00000109181	UGT2B10	1	OrthoMCL
WBGene00021709	ugt-29	Y49C4A.8	ENSG00000109181	UGT2B10	1	OrthoMCL
WBGene00010904	ugt-62	M88.1	ENSG00000135220	UGT2A3	3	InParanoid|OrthoInspector|OrthoMCL
WBGene00015965	ugt-48	C18C4.3	ENSG00000135220	UGT2A3	1	OrthoMCL
WBGene00021709	ugt-29	Y49C4A.8	ENSG00000135220	UGT2A3	1	OrthoMCL
WBGene00010904	ugt-62	M88.1	ENSG00000135226	UGT2B28	3	InParanoid|OrthoInspector|OrthoMCL
WBGene00015965	ugt-48	C18C4.3	ENSG00000135226	UGT2B28	1	OrthoMCL
WBGene00021709	ugt-29	Y49C4A.8	ENSG00000135226	UGT2B28	1	OrthoMCL
WBGene00007885	ugt-21	C33A12.6	ENSG00000145626	UGT3A1	1	InParanoid
WBGene00019515	ugt-19	K08B4.3	ENSG00000145626	UGT3A1	1	InParanoid
WBGene00021709	ugt-29	Y49C4A.8	ENSG00000145626	UGT3A1	1	InParanoid
WBGene00010904	ugt-62	M88.1	ENSG00000145626	UGT3A1	1	OrthoInspector
WBGene00010904	ugt-62	M88.1	ENSG00000156096	UGT2B4	3	InParanoid|OrthoInspector|OrthoMCL
WBGene00007885	ugt-21	C33A12.6	ENSG00000156096	UGT2B4	1	OMA
WBGene00011564	ugt-50	T07C5.1	ENSG00000156096	UGT2B4	1	OMA
WBGene00015965	ugt-48	C18C4.3	ENSG00000156096	UGT2B4	1	OrthoMCL
WBGene00021709	ugt-29	Y49C4A.8	ENSG00000156096	UGT2B4	1	OrthoMCL
WBGene00010904	ugt-62	M88.1	ENSG00000167165	UGT1A6	2	InParanoid|OrthoInspector
WBGene00007885	ugt-21	C33A12.6	ENSG00000167165	UGT1A6	1	OMA
WBGene00011564	ugt-50	T07C5.1	ENSG00000167165	UGT1A6	1	OMA
WBGene00007885	ugt-21	C33A12.6	ENSG00000168671	UGT3A2	1	InParanoid
WBGene00019515	ugt-19	K08B4.3	ENSG00000168671	UGT3A2	1	InParanoid
WBGene00021709	ugt-29	Y49C4A.8	ENSG00000168671	UGT3A2	1	InParanoid
WBGene00010904	ugt-62	M88.1	ENSG00000168671	UGT3A2	1	OrthoInspector
WBGene00010904	ugt-62	M88.1	ENSG00000171234	UGT2B7	3	InParanoid|OrthoInspector|OrthoMCL
WBGene00007885	ugt-21	C33A12.6	ENSG00000171234	UGT2B7	1	OMA
WBGene00011564	ugt-50	T07C5.1	ENSG00000171234	UGT2B7	1	OMA
WBGene00015965	ugt-48	C18C4.3	ENSG00000171234	UGT2B7	1	OrthoMCL
WBGene00021709	ugt-29	Y49C4A.8	ENSG00000171234	UGT2B7	1	OrthoMCL
WBGene00010904	ugt-62	M88.1	ENSG00000173610	UGT2A1	3	InParanoid|OrthoInspector|OrthoMCL
WBGene00015965	ugt-48	C18C4.3	ENSG00000173610	UGT2A1	1	OrthoMCL
WBGene00021709	ugt-29	Y49C4A.8	ENSG00000173610	UGT2A1	1	OrthoMCL
WBGene00007885	ugt-21	C33A12.6	ENSG00000174607	UGT8	1	OMA
WBGene00011564	ugt-50	T07C5.1	ENSG00000174607	UGT8	1	OMA
WBGene00010904	ugt-62	M88.1	ENSG00000174607	UGT8	2	OrthoInspector|OrthoMCL
WBGene00015965	ugt-48	C18C4.3	ENSG00000174607	UGT8	1	OrthoMCL
WBGene00021709	ugt-29	Y49C4A.8	ENSG00000174607	UGT8	1	OrthoMCL
WBGene00010904	ugt-62	M88.1	ENSG00000196620	UGT2B15	3	InParanoid|OrthoInspector|OrthoMCL
WBGene00015965	ugt-48	C18C4.3	ENSG00000196620	UGT2B15	1	OrthoMCL
WBGene00021709	ugt-29	Y49C4A.8	ENSG00000196620	UGT2B15	1	OrthoMCL
WBGene00010904	ugt-62	M88.1	ENSG00000197888	UGT2B17	3	InParanoid|OrthoInspector|OrthoMCL
WBGene00015965	ugt-48	C18C4.3	ENSG00000197888	UGT2B17	1	OrthoMCL
WBGene00021709	ugt-29	Y49C4A.8	ENSG00000197888	UGT2B17	1	OrthoMCL
WBGene00010904	ugt-62	M88.1	ENSG00000213759	UGT2B11	3	InParanoid|OrthoInspector|OrthoMCL
WBGene00007885	ugt-21	C33A12.6	ENSG00000213759	UGT2B11	1	OMA
WBGene00011564	ugt-50	T07C5.1	ENSG00000213759	UGT2B11	1	OMA
WBGene00015965	ugt-48	C18C4.3	ENSG00000213759	UGT2B11	1	OrthoMCL
WBGene00021709	ugt-29	Y49C4A.8	ENSG00000213759	UGT2B11	1	OrthoMCL
WBGene00010904	ugt-62	M88.1	ENSG00000240224	UGT1A5	2	InParanoid|OrthoInspector
WBGene00007885	ugt-21	C33A12.6	ENSG00000240224	UGT1A5	1	OMA
WBGene00011564	ugt-50	T07C5.1	ENSG00000240224	UGT1A5	1	OMA
WBGene00010904	ugt-62	M88.1	ENSG00000241119	UGT1A9	2	InParanoid|OrthoInspector
WBGene00007885	ugt-21	C33A12.6	ENSG00000241119	UGT1A9	1	OMA
WBGene00011564	ugt-50	T07C5.1	ENSG00000241119	UGT1A9	1	OMA
WBGene00010904	ugt-62	M88.1	ENSG00000241635	UGT1A1	2	InParanoid|OrthoInspector
WBGene00010904	ugt-62	M88.1	ENSG00000242366	UGT1A8	2	InParanoid|OrthoInspector
WBGene00007885	ugt-21	C33A12.6	ENSG00000242366	UGT1A8	1	OMA
WBGene00011564	ugt-50	T07C5.1	ENSG00000242366	UGT1A8	1	OMA
WBGene00010904	ugt-62	M88.1	ENSG00000242515	UGT1A10	2	InParanoid|OrthoInspector
WBGene00007885	ugt-21	C33A12.6	ENSG00000242515	UGT1A10	1	OMA
WBGene00011564	ugt-50	T07C5.1	ENSG00000242515	UGT1A10	1	OMA
WBGene00010904	ugt-62	M88.1	ENSG00000243135	UGT1A3	2	InParanoid|OrthoInspector
WBGene00007885	ugt-21	C33A12.6	ENSG00000243135	UGT1A3	1	OMA
WBGene00011564	ugt-50	T07C5.1	ENSG00000243135	UGT1A3	1	OMA
WBGene00010904	ugt-62	M88.1	ENSG00000244122	UGT1A7	2	InParanoid|OrthoInspector
WBGene00007885	ugt-21	C33A12.6	ENSG00000244122	UGT1A7	1	OMA
WBGene00011564	ugt-50	T07C5.1	ENSG00000244122	UGT1A7	1	OMA
WBGene00010904	ugt-62	M88.1	ENSG00000244474	UGT1A4	2	InParanoid|OrthoInspector
WBGene00007885	ugt-21	C33A12.6	ENSG00000244474	UGT1A4	1	OMA
WBGene00011564	ugt-50	T07C5.1	ENSG00000244474	UGT1A4	1	OMA
WBGene00010904	ugt-62	M88.1	ENSG00000271271	UGT2A2	2	InParanoid|OrthoInspector
WBGene00007885	ugt-21	C33A12.6	ENSG00000271271	UGT2A2	1	OMA
WBGene00011564	ugt-50	T07C5.1	ENSG00000271271	UGT2A2	1	OMA
WBGene00012464	arrd-7	Y17G7B.11	ENSG00000197070	ARRDC1	1	Ensembl Compara 87-89
WBGene00011423	ipla-7	T04B2.5	ENSG00000184381	PLA2G6	1	Ensembl Compara 87-89
WBGene00012464	arrd-7	Y17G7B.11	ENSG00000105643	ARRDC2	4	Ensembl Compara 87-89|InParanoid|OrthoInspector|OrthoMCL
WBGene00012464	arrd-7	Y17G7B.11	ENSG00000113369	ARRDC3	2	Ensembl Compara 87-89|OrthoInspector
WBGene00012464	arrd-7	Y17G7B.11	ENSG00000140450	ARRDC4	2	Ensembl Compara 87-89|OrthoInspector
WBGene00012464	arrd-7	Y17G7B.11	ENSG00000265972	TXNIP	1	Ensembl Compara 87-89
WBGene00009908	None	F49H6.5	ENSG00000124615	MOCS1	5	Ensembl Compara 87-89|InParanoid|OMA|OrthoInspector|OrthoMCL
WBGene00019018	abts-3	F57F10.1	ENSG00000088836	SLC4A11	6	Ensembl Compara 87-89|Homologene|InParanoid|OMA|OrthoInspector|OrthoMCL
WBGene00019146	None	H02F09.3	ENSG00000145113	MUC4	1	OrthoMCL
WBGene00019273	None	H43E16.1	ENSG00000145113	MUC4	1	OrthoMCL
WBGene00010134	None	F55H12.3	ENSG00000187957	DNER	1	Ensembl Compara 87-89
WBGene00010296	dgat-2	F59A1.10	ENSG00000062282	DGAT2	3	Ensembl Compara 87-89|InParanoid|OrthoMCL
WBGene00010296	dgat-2	F59A1.10	ENSG00000106384	MOGAT3	1	Ensembl Compara 87-89
WBGene00010296	dgat-2	F59A1.10	ENSG00000124003	MOGAT1	5	Ensembl Compara 87-89|InParanoid|OMA|OrthoInspector|OrthoMCL
WBGene00010296	dgat-2	F59A1.10	ENSG00000147160	AWAT2	1	Ensembl Compara 87-89
WBGene00010296	dgat-2	F59A1.10	ENSG00000166391	MOGAT2	6	Ensembl Compara 87-89|Homologene|InParanoid|OMA|OrthoInspector|OrthoMCL
WBGene00010296	dgat-2	F59A1.10	ENSG00000184210	DGAT2L6	1	Ensembl Compara 87-89
WBGene00010296	dgat-2	F59A1.10	ENSG00000204195	AWAT1	1	Ensembl Compara 87-89
WBGene00010593	gsnl-1	K06A4.3	ENSG00000006747	SCIN	3	Ensembl Compara 87-89|OrthoInspector|OrthoMCL
WBGene00010593	gsnl-1	K06A4.3	ENSG00000042493	CAPG	3	Ensembl Compara 87-89|OMA|OrthoInspector
WBGene00010593	gsnl-1	K06A4.3	ENSG00000127831	VIL1	3	Ensembl Compara 87-89|OrthoInspector|OrthoMCL
WBGene00010593	gsnl-1	K06A4.3	ENSG00000135407	AVIL	3	Ensembl Compara 87-89|OrthoInspector|OrthoMCL
WBGene00010593	gsnl-1	K06A4.3	ENSG00000136059	VILL	2	Ensembl Compara 87-89|OrthoMCL
WBGene00010593	gsnl-1	K06A4.3	ENSG00000148180	GSN	3	Ensembl Compara 87-89|OrthoInspector|OrthoMCL
WBGene00010593	gsnl-1	K06A4.3	ENSG00000197321	SVIL	1	Ensembl Compara 87-89
WBGene00010700	nipi-3	K09A9.1	ENSG00000071575	TRIB2	1	Ensembl Compara 87-89
WBGene00010700	nipi-3	K09A9.1	ENSG00000101255	TRIB3	1	Ensembl Compara 87-89
WBGene00010700	nipi-3	K09A9.1	ENSG00000173334	TRIB1	1	Ensembl Compara 87-89
WBGene00010700	nipi-3	K09A9.1	ENSG00000196182	STK40	1	Ensembl Compara 87-89
WBGene00045338	None	M01B2.13	ENSG00000165443	PHYHIPL	4	Ensembl Compara 87-89|Homologene|InParanoid|OrthoInspector
WBGene00045338	None	M01B2.13	ENSG00000168490	PHYHIP	4	Ensembl Compara 87-89|InParanoid|OMA|OrthoInspector
WBGene00021043	pck-1	W05G11.6	ENSG00000100889	PCK2	5	Ensembl Compara 87-89|Homologene|InParanoid|OrthoInspector|OrthoMCL
WBGene00021043	pck-1	W05G11.6	ENSG00000124253	PCK1	4	Ensembl Compara 87-89|InParanoid|OrthoInspector|OrthoMCL
WBGene00018696	pho-6	F52E1.8	ENSG00000162836	ACP6	1	Ensembl Compara 87-89
WBGene00012726	None	Y39G8B.5	ENSG00000104365	IKBKB	1	Ensembl Compara 87-89
WBGene00012726	None	Y39G8B.5	ENSG00000213341	CHUK	1	Ensembl Compara 87-89
WBGene00011361	lyst-1	T01H10.8	ENSG00000143669	LYST	1	Ensembl Compara 87-89
WBGene00011399	None	T03F6.3	ENSG00000113552	GNPDA1	5	Ensembl Compara 87-89|InParanoid|OMA|OrthoInspector|OrthoMCL
WBGene00011399	None	T03F6.3	ENSG00000163281	GNPDA2	6	Ensembl Compara 87-89|Homologene|InParanoid|OMA|OrthoInspector|OrthoMCL
WBGene00011474	aldo-1	T05D4.1	ENSG00000109107	ALDOC	6	Ensembl Compara 87-89|Homologene|InParanoid|OMA|OrthoInspector|OrthoMCL
WBGene00011474	aldo-1	T05D4.1	ENSG00000136872	ALDOB	4	Ensembl Compara 87-89|InParanoid|OrthoInspector|OrthoMCL
WBGene00011474	aldo-1	T05D4.1	ENSG00000149925	ALDOA	4	Ensembl Compara 87-89|InParanoid|OrthoInspector|OrthoMCL
WBGene00011767	agxt-1	T14D7.1	ENSG00000172482	AGXT	6	Ensembl Compara 87-89|Homologene|InParanoid|OMA|OrthoInspector|OrthoMCL
WBGene00011821	cdf-2	T18D3.3	ENSG00000104154	SLC30A4	2	Ensembl Compara 87-89|OrthoMCL
WBGene00000393	cdf-1	C15B12.7	ENSG00000104154	SLC30A4	1	OrthoMCL
WBGene00011821	cdf-2	T18D3.3	ENSG00000115194	SLC30A3	3	Ensembl Compara 87-89|InParanoid|OrthoInspector
WBGene00011821	cdf-2	T18D3.3	ENSG00000158014	SLC30A2	4	Ensembl Compara 87-89|Homologene|OMA|OrthoMCL
WBGene00000393	cdf-1	C15B12.7	ENSG00000158014	SLC30A2	1	OrthoMCL
WBGene00011821	cdf-2	T18D3.3	ENSG00000164756	SLC30A8	4	Ensembl Compara 87-89|InParanoid|OMA|OrthoInspector
WBGene00019273	None	H43E16.1	ENSG00000102804	TSC22D1	1	OMA
WBGene00011880	None	T21B6.3	ENSG00000126759	CFP	1	Ensembl Compara 87-89
WBGene00011932	sptl-3	T22G5.5	ENSG00000100596	SPTLC2	2	Ensembl Compara 87-89|OrthoMCL
WBGene00011932	sptl-3	T22G5.5	ENSG00000172296	SPTLC3	2	Ensembl Compara 87-89|OrthoMCL
WBGene00011938	alh-13	T22H6.2	ENSG00000059573	ALDH18A1	6	Ensembl Compara 87-89|Homologene|InParanoid|OMA|OrthoInspector|OrthoMCL
WBGene00012144	None	T28H10.3	ENSG00000100600	LGMN	6	Ensembl Compara 87-89|Homologene|InParanoid|OMA|OrthoInspector|OrthoMCL
WBGene00020784	tat-4	T24H7.5	ENSG00000118322	ATP10B	2	Ensembl Compara 87-89|OrthoMCL
WBGene00020784	tat-4	T24H7.5	ENSG00000145246	ATP10D	2	Ensembl Compara 87-89|OrthoMCL
WBGene00020784	tat-4	T24H7.5	ENSG00000206190	ATP10A	2	Ensembl Compara 87-89|OrthoMCL
WBGene00006533	tba-7	T28D6.2	ENSG00000075886	TUBA3D	1	OrthoMCL
WBGene00006533	tba-7	T28D6.2	ENSG00000152086	TUBA3E	1	OrthoMCL
WBGene00006533	tba-7	T28D6.2	ENSG00000198033	TUBA3C	1	OrthoMCL
WBGene00009058	None	F22E12.1	ENSG00000121064	SCPEP1	1	OrthoMCL
WBGene00012722	None	Y39G8B.1	ENSG00000085662	AKR1B1	4	Ensembl Compara 87-89|InParanoid|OrthoInspector|OrthoMCL
WBGene00012722	None	Y39G8B.1	ENSG00000117448	AKR1A1	4	Ensembl Compara 87-89|InParanoid|OrthoInspector|OrthoMCL
WBGene00012722	None	Y39G8B.1	ENSG00000122787	AKR1D1	3	Ensembl Compara 87-89|InParanoid|OrthoMCL
WBGene00012722	None	Y39G8B.1	ENSG00000151632	AKR1C2	2	Ensembl Compara 87-89|InParanoid
WBGene00012722	None	Y39G8B.1	ENSG00000165568	AKR1E2	2	Ensembl Compara 87-89|InParanoid
WBGene00012722	None	Y39G8B.1	ENSG00000187134	AKR1C1	2	Ensembl Compara 87-89|InParanoid
WBGene00012722	None	Y39G8B.1	ENSG00000196139	AKR1C3	1	Ensembl Compara 87-89
WBGene00012722	None	Y39G8B.1	ENSG00000198074	AKR1B10	4	Ensembl Compara 87-89|InParanoid|OrthoInspector|OrthoMCL
WBGene00012722	None	Y39G8B.1	ENSG00000198610	AKR1C4	2	Ensembl Compara 87-89|InParanoid
WBGene00012722	None	Y39G8B.1	ENSG00000227471	AKR1B15	2	Ensembl Compara 87-89|InParanoid
WBGene00012891	sorb-1	Y45F10D.13	ENSG00000095637	SORBS1	3	Ensembl Compara 87-89|InParanoid|OrthoInspector
WBGene00012891	sorb-1	Y45F10D.13	ENSG00000120896	SORBS3	3	Ensembl Compara 87-89|OrthoInspector|OrthoMCL
WBGene00012891	sorb-1	Y45F10D.13	ENSG00000154556	SORBS2	3	Ensembl Compara 87-89|InParanoid|OrthoInspector
WBGene00013042	cccp-1	Y49E10.23	ENSG00000165813	CCDC186	6	Ensembl Compara 87-89|Homologene|InParanoid|OMA|OrthoInspector|OrthoMCL
WBGene00013215	None	Y54G11A.4	ENSG00000075234	TTC38	5	Ensembl Compara 87-89|Homologene|InParanoid|OrthoInspector|OrthoMCL
WBGene00013216	None	Y54G11A.7	ENSG00000075234	TTC38	6	Ensembl Compara 87-89|Homologene|InParanoid|OMA|OrthoInspector|OrthoMCL
WBGene00013379	None	Y62E10A.13	ENSG00000146733	PSPH	6	Ensembl Compara 87-89|Homologene|InParanoid|OMA|OrthoInspector|OrthoMCL
WBGene00013492	None	Y70C5C.1	ENSG00000119912	IDE	5	Ensembl Compara 87-89|Homologene|InParanoid|OrthoInspector|OrthoMCL
WBGene00016511	None	C37H5.13	ENSG00000101473	ACOT8	6	Ensembl Compara 87-89|Homologene|InParanoid|OMA|OrthoInspector|OrthoMCL
WBGene00013855	None	ZC116.3	ENSG00000107611	CUBN	6	Ensembl Compara 87-89|Homologene|InParanoid|OMA|OrthoInspector|OrthoMCL
WBGene00013855	None	ZC116.3	ENSG00000123610	TNFAIP6	1	Ensembl Compara 87-89
WBGene00013855	None	ZC116.3	ENSG00000235718	MFRP	1	Ensembl Compara 87-89
WBGene00013869	None	ZC373.4	ENSG00000101306	MYLK2	1	Ensembl Compara 87-89
WBGene00013869	None	ZC373.4	ENSG00000140795	MYLK3	2	Ensembl Compara 87-89|OrthoMCL
WBGene00013869	None	ZC373.4	ENSG00000145949	MYLK4	2	Ensembl Compara 87-89|OrthoInspector
WBGene00014215	obr-3	ZK1086.1	ENSG00000021762	OSBPL5	4	Ensembl Compara 87-89|InParanoid|OrthoInspector|OrthoMCL
WBGene00014215	obr-3	ZK1086.1	ENSG00000091039	OSBPL8	6	Ensembl Compara 87-89|Homologene|InParanoid|OMA|OrthoInspector|OrthoMCL
WBGene00019068	faah-3	F58H7.2	ENSG00000117480	FAAH	5	Ensembl Compara 87-89|Homologene|InParanoid|OrthoInspector|OrthoMCL
WBGene00016022	None	C23H3.9	ENSG00000214309	MBLAC1	1	Ensembl Compara 87-89
WBGene00015356	tag-278	C02F12.7	ENSG00000047662	FAM184B	2	Ensembl Compara 87-89|InParanoid
WBGene00015356	tag-278	C02F12.7	ENSG00000111879	FAM184A	4	Ensembl Compara 87-89|InParanoid|OrthoInspector|OrthoMCL
WBGene00015632	None	C09D4.1	ENSG00000119686	FLVCR2	5	Ensembl Compara 87-89|InParanoid|OMA|OrthoInspector|OrthoMCL
WBGene00015632	None	C09D4.1	ENSG00000162769	FLVCR1	4	Ensembl Compara 87-89|InParanoid|OrthoInspector|OrthoMCL
WBGene00015752	None	C14B9.2	ENSG00000155660	PDIA4	6	Ensembl Compara 87-89|Homologene|InParanoid|OMA|OrthoInspector|OrthoMCL
WBGene00015793	None	C15C7.7	ENSG00000101346	POFUT1	6	Ensembl Compara 87-89|Homologene|InParanoid|OMA|OrthoInspector|OrthoMCL
WBGene00016030	None	C24A1.3	ENSG00000116783	TNNI3K	5	Ensembl Compara 87-89|Homologene|InParanoid|OrthoInspector|OrthoMCL
WBGene00016030	None	C24A1.3	ENSG00000259030	FPGT-TNNI3K	2	Ensembl Compara 87-89|OMA
WBGene00016188	sec-15	C28G1.3	ENSG00000138190	EXOC6	5	Ensembl Compara 87-89|InParanoid|OMA|OrthoInspector|OrthoMCL
WBGene00016188	sec-15	C28G1.3	ENSG00000144036	EXOC6B	6	Ensembl Compara 87-89|Homologene|InParanoid|OMA|OrthoInspector|OrthoMCL
WBGene00016314	None	C32D5.6	ENSG00000085831	TTC39A	5	Ensembl Compara 87-89|InParanoid|OMA|OrthoInspector|OrthoMCL
WBGene00016314	None	C32D5.6	ENSG00000155158	TTC39B	6	Ensembl Compara 87-89|Homologene|InParanoid|OMA|OrthoInspector|OrthoMCL
WBGene00016314	None	C32D5.6	ENSG00000168234	TTC39C	1	Ensembl Compara 87-89
WBGene00019869	cnnm-2	R04E5.2	ENSG00000158158	CNNM4	2	OrthoInspector|OrthoMCL
WBGene00016415	ampd-1	C34F11.3	ENSG00000116337	AMPD2	5	Ensembl Compara 87-89|Homologene|InParanoid|OrthoInspector|OrthoMCL
WBGene00016415	ampd-1	C34F11.3	ENSG00000116748	AMPD1	3	Ensembl Compara 87-89|OMA|OrthoMCL
WBGene00016415	ampd-1	C34F11.3	ENSG00000133805	AMPD3	2	Ensembl Compara 87-89|OrthoMCL
WBGene00016539	madd-2	C39F7.2	ENSG00000080561	MID2	1	Ensembl Compara 87-89
WBGene00016539	madd-2	C39F7.2	ENSG00000100505	TRIM9	6	Ensembl Compara 87-89|Homologene|InParanoid|OMA|OrthoInspector|OrthoMCL
WBGene00016539	madd-2	C39F7.2	ENSG00000101871	MID1	1	Ensembl Compara 87-89
WBGene00016190	None	C28G1.5	ENSG00000101871	MID1	1	InParanoid
WBGene00016539	madd-2	C39F7.2	ENSG00000105255	FSD1	1	Ensembl Compara 87-89
WBGene00016539	madd-2	C39F7.2	ENSG00000106701	FSD1L	1	Ensembl Compara 87-89
WBGene00016539	madd-2	C39F7.2	ENSG00000119283	TRIM67	4	Ensembl Compara 87-89|InParanoid|OrthoInspector|OrthoMCL
WBGene00016539	madd-2	C39F7.2	ENSG00000138100	TRIM54	1	Ensembl Compara 87-89
WBGene00016539	madd-2	C39F7.2	ENSG00000147573	TRIM55	1	Ensembl Compara 87-89
WBGene00016539	madd-2	C39F7.2	ENSG00000152503	TRIM36	1	Ensembl Compara 87-89
WBGene00016190	None	C28G1.5	ENSG00000152503	TRIM36	1	InParanoid
WBGene00016539	madd-2	C39F7.2	ENSG00000158022	TRIM63	1	Ensembl Compara 87-89
WBGene00016190	None	C28G1.5	ENSG00000158022	TRIM63	1	OMA
WBGene00016539	madd-2	C39F7.2	ENSG00000163462	TRIM46	1	Ensembl Compara 87-89
WBGene00016539	madd-2	C39F7.2	ENSG00000204977	TRIM13	1	Ensembl Compara 87-89
WBGene00018354	None	F42G2.5	ENSG00000204977	TRIM13	1	InParanoid
WBGene00019590	None	K09F6.7	ENSG00000204977	TRIM13	1	InParanoid
WBGene00016539	madd-2	C39F7.2	ENSG00000213186	TRIM59	1	Ensembl Compara 87-89
WBGene00018354	None	F42G2.5	ENSG00000213186	TRIM59	1	InParanoid
WBGene00019590	None	K09F6.7	ENSG00000213186	TRIM59	1	InParanoid
WBGene00022610	None	ZC416.6	ENSG00000111144	LTA4H	6	Ensembl Compara 87-89|Homologene|InParanoid|OMA|OrthoInspector|OrthoMCL
WBGene00016735	fhod-1	C46H11.11	ENSG00000134775	FHOD3	5	Ensembl Compara 87-89|InParanoid|OMA|OrthoInspector|OrthoMCL
WBGene00016735	fhod-1	C46H11.11	ENSG00000135723	FHOD1	5	Ensembl Compara 87-89|Homologene|OMA|OrthoInspector|OrthoMCL
WBGene00016735	fhod-1	C46H11.11	ENSG00000155816	FMN2	1	Ensembl Compara 87-89
WBGene00016735	fhod-1	C46H11.11	ENSG00000248905	FMN1	1	Ensembl Compara 87-89
WBGene00017103	klo-2	E02H9.5	ENSG00000115850	LCT	3	Ensembl Compara 87-89|OrthoInspector|OrthoMCL
WBGene00017103	klo-2	E02H9.5	ENSG00000133116	KL	3	Ensembl Compara 87-89|OrthoInspector|OrthoMCL
WBGene00017103	klo-2	E02H9.5	ENSG00000134962	KLB	3	Ensembl Compara 87-89|OrthoInspector|OrthoMCL
WBGene00017103	klo-2	E02H9.5	ENSG00000188501	LCTL	4	Ensembl Compara 87-89|InParanoid|OrthoInspector|OrthoMCL
WBGene00017103	klo-2	E02H9.5	ENSG00000249948	GBA3	1	Ensembl Compara 87-89
WBGene00016920	None	C54E4.5	ENSG00000100253	MIOX	6	Ensembl Compara 87-89|Homologene|InParanoid|OMA|OrthoInspector|OrthoMCL
WBGene00016939	None	C55B6.1	ENSG00000175066	GK5	6	Ensembl Compara 87-89|Homologene|InParanoid|OMA|OrthoInspector|OrthoMCL
WBGene00012782	None	Y43C5A.2	ENSG00000187151	ANGPTL5	1	InParanoid
WBGene00019895	aagr-2	R05F9.12	ENSG00000090402	SI	3	Ensembl Compara 87-89|OrthoInspector|OrthoMCL
WBGene00019895	aagr-2	R05F9.12	ENSG00000257335	MGAM	4	Ensembl Compara 87-89|Homologene|InParanoid|OrthoInspector
WBGene00019895	aagr-2	R05F9.12	ENSG00000257743	MGAM2	2	Ensembl Compara 87-89|OrthoInspector
WBGene00017080	lec-12	DC2.3	ENSG00000133317	LGALS12	1	Ensembl Compara 87-89
WBGene00017080	lec-12	DC2.3	ENSG00000171747	LGALS4	2	Ensembl Compara 87-89|OrthoInspector
WBGene00017163	dnpp-1	F01F1.9	ENSG00000123992	DNPEP	6	Ensembl Compara 87-89|Homologene|InParanoid|OMA|OrthoInspector|OrthoMCL
WBGene00017195	glo-4	F07C3.4	ENSG00000156313	RPGR	1	Ensembl Compara 87-89
WBGene00017195	glo-4	F07C3.4	ENSG00000179051	RCC2	1	Ensembl Compara 87-89
WBGene00017241	pcyt-1	F08C6.2	ENSG00000102230	PCYT1B	5	Ensembl Compara 87-89|InParanoid|OMA|OrthoInspector|OrthoMCL
WBGene00017241	pcyt-1	F08C6.2	ENSG00000161217	PCYT1A	6	Ensembl Compara 87-89|Homologene|InParanoid|OMA|OrthoInspector|OrthoMCL
WBGene00017244	apy-1	F08C6.6	ENSG00000171302	CANT1	6	Ensembl Compara 87-89|Homologene|InParanoid|OMA|OrthoInspector|OrthoMCL
WBGene00017373	None	F10G7.10	ENSG00000144357	UBR3	5	Ensembl Compara 87-89|InParanoid|OMA|OrthoInspector|OrthoMCL
WBGene00017687	ets-4	F22A3.1	ENSG00000124664	SPDEF	4	Ensembl Compara 87-89|InParanoid|OrthoInspector|OrthoMCL
WBGene00009940	strl-1	F52F12.7	ENSG00000147465	STAR	2	InParanoid|OrthoMCL
WBGene00017866	stn-2	F27D9.8	ENSG00000147481	SNTG1	5	Ensembl Compara 87-89|Homologene|InParanoid|OrthoInspector|OrthoMCL
WBGene00017866	stn-2	F27D9.8	ENSG00000172554	SNTG2	5	Ensembl Compara 87-89|InParanoid|OMA|OrthoInspector|OrthoMCL
WBGene00018354	None	F42G2.5	ENSG00000101558	VAPA	2	Ensembl Compara 87-89|OrthoInspector
WBGene00018354	None	F42G2.5	ENSG00000124164	VAPB	2	Ensembl Compara 87-89|OrthoInspector
WBGene00018763	None	F53F10.1	ENSG00000135736	CCDC102A	2	Ensembl Compara 87-89|OrthoInspector
WBGene00018763	None	F53F10.1	ENSG00000150636	CCDC102B	2	Ensembl Compara 87-89|OrthoInspector
WBGene00018966	None	F56D2.5	ENSG00000013561	RNF14	5	Ensembl Compara 87-89|InParanoid|OMA|OrthoInspector|OrthoMCL
WBGene00019615	None	K10B4.3	ENSG00000197415	VEPH1	6	Ensembl Compara 87-89|Homologene|InParanoid|OMA|OrthoInspector|OrthoMCL
WBGene00019813	ger-1	R01H2.5	ENSG00000104522	TSTA3	5	Ensembl Compara 87-89|Homologene|InParanoid|OrthoInspector|OrthoMCL
WBGene00019832	osg-1	R02F2.2	ENSG00000110237	ARHGEF17	3	Ensembl Compara 87-89|OrthoInspector|OrthoMCL
WBGene00016939	None	C55B6.1	ENSG00000196475	GK2	1	OrthoMCL
WBGene00016939	None	C55B6.1	ENSG00000198814	GK	1	OrthoMCL
WBGene00016939	None	C55B6.1	ENSG00000229894	GK3P	1	OrthoMCL
WBGene00020251	camt-1	T05C1.4	ENSG00000108509	CAMTA2	5	Ensembl Compara 87-89|InParanoid|OMA|OrthoInspector|OrthoMCL
WBGene00020251	camt-1	T05C1.4	ENSG00000171735	CAMTA1	4	Ensembl Compara 87-89|InParanoid|OrthoInspector|OrthoMCL
WBGene00012726	None	Y39G8B.5	ENSG00000263528	IKBKE	1	OrthoInspector
WBGene00020486	None	T13C5.6	ENSG00000160539	PLPP7	2	Ensembl Compara 87-89|OrthoInspector
WBGene00020486	None	T13C5.6	ENSG00000205808	PLPP6	3	Ensembl Compara 87-89|OrthoInspector|OrthoMCL
WBGene00020838	trak-1	T27A3.1	ENSG00000115993	TRAK2	2	Ensembl Compara 87-89|OrthoMCL
WBGene00020838	trak-1	T27A3.1	ENSG00000173805	HAP1	1	Ensembl Compara 87-89
WBGene00020838	trak-1	T27A3.1	ENSG00000182606	TRAK1	3	Ensembl Compara 87-89|OrthoInspector|OrthoMCL
WBGene00020952	kel-8	W02G9.2	ENSG00000145332	KLHL8	6	Ensembl Compara 87-89|Homologene|InParanoid|OMA|OrthoInspector|OrthoMCL
WBGene00021371	nape-1	Y37E11AR.4	ENSG00000161048	NAPEPLD	5	Ensembl Compara 87-89|Homologene|InParanoid|OrthoInspector|OrthoMCL
WBGene00022175	None	Y71H2AM.10	ENSG00000006118	TMEM132A	2	Ensembl Compara 87-89|OrthoInspector
WBGene00022175	None	Y71H2AM.10	ENSG00000139364	TMEM132B	3	Ensembl Compara 87-89|OrthoInspector|OrthoMCL
WBGene00022175	None	Y71H2AM.10	ENSG00000151952	TMEM132D	3	Ensembl Compara 87-89|OrthoInspector|OrthoMCL
WBGene00022175	None	Y71H2AM.10	ENSG00000181234	TMEM132C	3	Ensembl Compara 87-89|OrthoInspector|OrthoMCL
WBGene00022175	None	Y71H2AM.10	ENSG00000181291	TMEM132E	3	Ensembl Compara 87-89|OrthoInspector|OrthoMCL
WBGene00022201	None	Y71H10B.1	ENSG00000076685	NT5C2	5	Ensembl Compara 87-89|Homologene|OMA|OrthoInspector|OrthoMCL
WBGene00022201	None	Y71H10B.1	ENSG00000144130	NT5DC4	3	Ensembl Compara 87-89|OrthoInspector|OrthoMCL
WBGene00022281	abtm-1	Y74C10AR.3	ENSG00000131269	ABCB7	6	Ensembl Compara 87-89|Homologene|InParanoid|OMA|OrthoInspector|OrthoMCL
WBGene00022593	None	ZC328.3	ENSG00000155324	GRAMD3	1	Ensembl Compara 87-89
WBGene00022593	None	ZC328.3	ENSG00000175318	GRAMD2	1	Ensembl Compara 87-89
WBGene00001817	haf-7	Y50E8A.16	ENSG00000135776	ABCB10	1	OrthoMCL
WBGene00002199	kin-15	M176.6	ENSG00000134853	PDGFRA	1	OrthoInspector
WBGene00006894	ver-1	T17A3.1	ENSG00000134853	PDGFRA	1	OrthoInspector
WBGene00011168	None	R09D1.12	ENSG00000134853	PDGFRA	1	OrthoInspector
WBGene00021745	None	Y50D4B.6	ENSG00000134853	PDGFRA	1	OrthoInspector
WBGene00002217	klp-4	F56E3.3	ENSG00000223519	None	1	OrthoMCL
WBGene00007913	cyp-36A1	C34B7.3	ENSG00000197838	CYP2A13	2	Homologene|OrthoInspector
WBGene00019967	cyp-33C8	R08F11.3	ENSG00000197838	CYP2A13	2	InParanoid|OrthoInspector
WBGene00007913	cyp-36A1	C34B7.3	ENSG00000198077	CYP2A7	2	Homologene|OrthoInspector
WBGene00019967	cyp-33C8	R08F11.3	ENSG00000198077	CYP2A7	1	InParanoid
WBGene00007913	cyp-36A1	C34B7.3	ENSG00000255974	CYP2A6	2	Homologene|OrthoInspector
WBGene00019967	cyp-33C8	R08F11.3	ENSG00000255974	CYP2A6	2	InParanoid|OrthoInspector
WBGene00000645	col-69	K01A2.7	ENSG00000133661	SFTPD	1	InParanoid
WBGene00000716	col-143	T15B7.3	ENSG00000133661	SFTPD	1	InParanoid
WBGene00000749	col-176	ZC373.7	ENSG00000133661	SFTPD	1	InParanoid
WBGene00000670	col-95	Y41C4A.16	ENSG00000019169	MARCO	1	InParanoid
WBGene00007913	cyp-36A1	C34B7.3	ENSG00000073067	CYP2W1	1	OrthoInspector
WBGene00007913	cyp-36A1	C34B7.3	ENSG00000275211	CYP2D6	1	OrthoInspector
WBGene00019967	cyp-33C8	R08F11.3	ENSG00000275211	CYP2D6	1	OrthoInspector
WBGene00000393	cdf-1	C15B12.7	ENSG00000196660	SLC30A10	3	InParanoid|OrthoInspector|OrthoMCL
WBGene00011821	cdf-2	T18D3.3	ENSG00000196660	SLC30A10	1	OrthoMCL
WBGene00001483	fog-3	C03C11.2	ENSG00000141232	TOB1	1	InParanoid
WBGene00001483	fog-3	C03C11.2	ENSG00000183864	TOB2	2	InParanoid|OrthoMCL
WBGene00001883	his-9	ZK131.3	ENSG00000183598	HIST2H3D	3	InParanoid|OrthoInspector|OrthoMCL
WBGene00001887	his-13	ZK131.7	ENSG00000183598	HIST2H3D	3	InParanoid|OrthoInspector|OrthoMCL
WBGene00001899	his-25	ZK131.2	ENSG00000183598	HIST2H3D	3	InParanoid|OrthoInspector|OrthoMCL
WBGene00001883	his-9	ZK131.3	ENSG00000203811	HIST2H3C	3	InParanoid|OrthoInspector|OrthoMCL
WBGene00001887	his-13	ZK131.7	ENSG00000203811	HIST2H3C	3	InParanoid|OrthoInspector|OrthoMCL
WBGene00001899	his-25	ZK131.2	ENSG00000203811	HIST2H3C	3	InParanoid|OrthoInspector|OrthoMCL
WBGene00001883	his-9	ZK131.3	ENSG00000203852	HIST2H3A	3	InParanoid|OrthoInspector|OrthoMCL
WBGene00001887	his-13	ZK131.7	ENSG00000203852	HIST2H3A	4	InParanoid|OMA|OrthoInspector|OrthoMCL
WBGene00001899	his-25	ZK131.2	ENSG00000203852	HIST2H3A	3	InParanoid|OrthoInspector|OrthoMCL
WBGene00017080	lec-12	DC2.3	ENSG00000282992	LGALS4	1	OrthoInspector
WBGene00003149	mbk-1	T04C10.1	ENSG00000281320	DYRK1B	2	InParanoid|OrthoInspector
WBGene00003374	mlk-1	K11D12.10	ENSG00000006432	MAP3K9	3	InParanoid|OrthoInspector|OrthoMCL
WBGene00003374	mlk-1	K11D12.10	ENSG00000130758	MAP3K10	2	InParanoid|OrthoMCL
WBGene00003374	mlk-1	K11D12.10	ENSG00000143674	MAP3K21	2	InParanoid|OrthoMCL
WBGene00003374	mlk-1	K11D12.10	ENSG00000173327	MAP3K11	2	InParanoid|OrthoMCL
WBGene00003607	nhr-8	F33D4.1	ENSG00000111424	VDR	1	InParanoid
WBGene00003607	nhr-8	F33D4.1	ENSG00000143257	NR1I3	1	InParanoid
WBGene00003607	nhr-8	F33D4.1	ENSG00000144852	NR1I2	2	InParanoid|OrthoInspector
WBGene00004053	tank-1	ZK1005.1	ENSG00000107854	TNKS2	1	InParanoid
WBGene00004053	tank-1	ZK1005.1	ENSG00000173273	TNKS	1	InParanoid
WBGene00012131	None	T28F3.5	ENSG00000275176	ACACA	2	OMA|OrthoInspector
WBGene00004184	None	T19D2.2	ENSG00000275575	PTP4A3	3	InParanoid|OMA|OrthoInspector
WBGene00004249	pvf-1	Y39A3CL.6	ENSG00000100311	PDGFB	1	InParanoid
WBGene00004249	pvf-1	Y39A3CL.6	ENSG00000197461	PDGFA	1	InParanoid
WBGene00004993	spp-8	C28C12.5	ENSG00000178597	PSAPL1	1	InParanoid
WBGene00004995	spp-10	C28C12.7	ENSG00000178597	PSAPL1	1	InParanoid
WBGene00004993	spp-8	C28C12.5	ENSG00000197746	PSAP	1	InParanoid
WBGene00004995	spp-10	C28C12.7	ENSG00000197746	PSAP	3	InParanoid|OMA|OrthoMCL
WBGene00006894	ver-1	T17A3.1	ENSG00000037280	FLT4	2	InParanoid|OrthoInspector
WBGene00002199	kin-15	M176.6	ENSG00000037280	FLT4	1	OrthoInspector
WBGene00011168	None	R09D1.12	ENSG00000037280	FLT4	1	OrthoInspector
WBGene00021745	None	Y50D4B.6	ENSG00000037280	FLT4	1	OrthoInspector
WBGene00006894	ver-1	T17A3.1	ENSG00000102755	FLT1	2	InParanoid|OrthoInspector
WBGene00002199	kin-15	M176.6	ENSG00000102755	FLT1	1	OrthoInspector
WBGene00011168	None	R09D1.12	ENSG00000102755	FLT1	1	OrthoInspector
WBGene00021745	None	Y50D4B.6	ENSG00000102755	FLT1	1	OrthoInspector
WBGene00006894	ver-1	T17A3.1	ENSG00000128052	KDR	2	InParanoid|OrthoInspector
WBGene00002199	kin-15	M176.6	ENSG00000128052	KDR	1	OrthoInspector
WBGene00011168	None	R09D1.12	ENSG00000128052	KDR	1	OrthoInspector
WBGene00021745	None	Y50D4B.6	ENSG00000128052	KDR	1	OrthoInspector
WBGene00006923	vhp-1	F08B1.1	ENSG00000273793	DUSP8	2	InParanoid|OrthoInspector
WBGene00006923	vhp-1	F08B1.1	ENSG00000278165	DUSP8	2	InParanoid|OrthoInspector
WBGene00006923	vhp-1	F08B1.1	ENSG00000280962	DUSP16	2	InParanoid|OrthoInspector
WBGene00006971	zak-1	R13F6.6	ENSG00000091436	MAP3K20	2	InParanoid|OrthoMCL
WBGene00007146	None	B0334.6	ENSG00000180269	GPR139	3	InParanoid|OrthoInspector|OrthoMCL
WBGene00007146	None	B0334.6	ENSG00000257008	GPR142	1	InParanoid
WBGene00012251	clec-49	W04E12.6	ENSG00000118004	COLEC11	1	InParanoid
WBGene00012253	clec-50	W04E12.8	ENSG00000118004	COLEC11	1	InParanoid
WBGene00014137	clec-187	ZK896.6	ENSG00000118004	COLEC11	1	InParanoid
WBGene00015050	clec-51	B0218.6	ENSG00000118004	COLEC11	1	InParanoid
WBGene00012251	clec-49	W04E12.6	ENSG00000122852	SFTPA1	1	InParanoid
WBGene00012253	clec-50	W04E12.8	ENSG00000122852	SFTPA1	1	InParanoid
WBGene00014137	clec-187	ZK896.6	ENSG00000122852	SFTPA1	1	InParanoid
WBGene00015050	clec-51	B0218.6	ENSG00000122852	SFTPA1	1	InParanoid
WBGene00012251	clec-49	W04E12.6	ENSG00000165471	MBL2	1	InParanoid
WBGene00012253	clec-50	W04E12.8	ENSG00000165471	MBL2	1	InParanoid
WBGene00014137	clec-187	ZK896.6	ENSG00000165471	MBL2	1	InParanoid
WBGene00015050	clec-51	B0218.6	ENSG00000165471	MBL2	1	InParanoid
WBGene00012251	clec-49	W04E12.6	ENSG00000184374	COLEC10	1	InParanoid
WBGene00012253	clec-50	W04E12.8	ENSG00000184374	COLEC10	1	InParanoid
WBGene00014137	clec-187	ZK896.6	ENSG00000184374	COLEC10	1	InParanoid
WBGene00015050	clec-51	B0218.6	ENSG00000184374	COLEC10	1	InParanoid
WBGene00012251	clec-49	W04E12.6	ENSG00000185303	SFTPA2	1	InParanoid
WBGene00012253	clec-50	W04E12.8	ENSG00000185303	SFTPA2	1	InParanoid
WBGene00014137	clec-187	ZK896.6	ENSG00000185303	SFTPA2	1	InParanoid
WBGene00015050	clec-51	B0218.6	ENSG00000185303	SFTPA2	1	InParanoid
WBGene00007857	None	C31H5.6	ENSG00000276559	BAAT	3	InParanoid|OMA|OrthoInspector
WBGene00020989	None	W03D8.8	ENSG00000276559	BAAT	3	InParanoid|OMA|OrthoInspector
WBGene00009306	maph-1.1	F32A7.5	ENSG00000130479	MAP1S	1	InParanoid
WBGene00009306	maph-1.1	F32A7.5	ENSG00000131711	MAP1B	1	InParanoid
WBGene00009306	maph-1.1	F32A7.5	ENSG00000166963	MAP1A	1	InParanoid
WBGene00020004	None	R11E3.2	ENSG00000089057	SLC23A2	4	InParanoid|OMA|OrthoInspector|OrthoMCL
WBGene00020004	None	R11E3.2	ENSG00000170482	SLC23A1	3	InParanoid|OrthoInspector|OrthoMCL
WBGene00009859	clec-33	F49A5.7	ENSG00000163815	CLEC3B	1	InParanoid
WBGene00011852	clec-26	T20B3.12	ENSG00000163815	CLEC3B	1	InParanoid
WBGene00015403	clec-10	C03H5.1	ENSG00000163815	CLEC3B	1	InParanoid
WBGene00019928	clec-44	R07C3.12	ENSG00000163815	CLEC3B	1	InParanoid
WBGene00044332	clec-36	T20B3.16	ENSG00000163815	CLEC3B	1	InParanoid
WBGene00009859	clec-33	F49A5.7	ENSG00000166509	CLEC3A	1	InParanoid
WBGene00011852	clec-26	T20B3.12	ENSG00000166509	CLEC3A	1	InParanoid
WBGene00015403	clec-10	C03H5.1	ENSG00000166509	CLEC3A	1	InParanoid
WBGene00019928	clec-44	R07C3.12	ENSG00000166509	CLEC3A	1	InParanoid
WBGene00044332	clec-36	T20B3.16	ENSG00000166509	CLEC3A	1	InParanoid
WBGene00014001	pyk-2	ZK593.1	ENSG00000262785	PKLR	2	OMA|OrthoInspector
WBGene00019967	cyp-33C8	R08F11.3	ENSG00000108242	CYP2C18	2	InParanoid|OrthoMCL
WBGene00007913	cyp-36A1	C34B7.3	ENSG00000108242	CYP2C18	2	OrthoInspector|OrthoMCL
WBGene00019967	cyp-33C8	R08F11.3	ENSG00000130649	CYP2E1	2	InParanoid|OrthoInspector
WBGene00007913	cyp-36A1	C34B7.3	ENSG00000130649	CYP2E1	1	OrthoInspector
WBGene00019967	cyp-33C8	R08F11.3	ENSG00000138109	CYP2C9	3	InParanoid|OrthoInspector|OrthoMCL
WBGene00007913	cyp-36A1	C34B7.3	ENSG00000138109	CYP2C9	2	OrthoInspector|OrthoMCL
WBGene00019967	cyp-33C8	R08F11.3	ENSG00000138115	CYP2C8	2	InParanoid|OrthoMCL
WBGene00007913	cyp-36A1	C34B7.3	ENSG00000138115	CYP2C8	2	OrthoInspector|OrthoMCL
WBGene00019967	cyp-33C8	R08F11.3	ENSG00000165841	CYP2C19	2	InParanoid|OrthoMCL
WBGene00007913	cyp-36A1	C34B7.3	ENSG00000165841	CYP2C19	2	OrthoInspector|OrthoMCL
WBGene00019967	cyp-33C8	R08F11.3	ENSG00000167600	CYP2S1	1	InParanoid
WBGene00007913	cyp-36A1	C34B7.3	ENSG00000167600	CYP2S1	1	OrthoInspector
WBGene00019967	cyp-33C8	R08F11.3	ENSG00000197408	CYP2B6	2	InParanoid|OrthoMCL
WBGene00007913	cyp-36A1	C34B7.3	ENSG00000197408	CYP2B6	2	OrthoInspector|OrthoMCL
WBGene00019967	cyp-33C8	R08F11.3	ENSG00000197446	CYP2F1	2	InParanoid|OrthoInspector
WBGene00007913	cyp-36A1	C34B7.3	ENSG00000197446	CYP2F1	1	OrthoInspector
WBGene00010904	ugt-62	M88.1	ENSG00000275190	UGT2B10	2	InParanoid|OrthoInspector
WBGene00010904	ugt-62	M88.1	ENSG00000278216	UGT2A3	2	InParanoid|OrthoInspector
WBGene00007885	ugt-21	C33A12.6	ENSG00000278216	UGT2A3	1	OMA
WBGene00011564	ugt-50	T07C5.1	ENSG00000278216	UGT2A3	1	OMA
WBGene00011486	None	T05E12.3	ENSG00000168301	KCTD6	1	InParanoid
WBGene00017705	None	F22E5.6	ENSG00000168301	KCTD6	1	InParanoid
WBGene00022570	sdz-35	ZC239.12	ENSG00000168301	KCTD6	1	InParanoid
WBGene00022572	None	ZC239.14	ENSG00000168301	KCTD6	1	InParanoid
WBGene00022569	None	ZC239.6	ENSG00000198553	KCNRG	1	InParanoid
WBGene00016912	clec-86	C54D1.2	ENSG00000115386	REG1A	2	InParanoid|OMA
WBGene00016912	clec-86	C54D1.2	ENSG00000134193	REG4	1	InParanoid
WBGene00016912	clec-86	C54D1.2	ENSG00000143954	REG3G	2	InParanoid|OMA
WBGene00016912	clec-86	C54D1.2	ENSG00000172016	REG3A	1	InParanoid
WBGene00016912	clec-86	C54D1.2	ENSG00000172023	REG1B	2	InParanoid|OMA
WBGene00012782	None	Y43C5A.2	ENSG00000091879	ANGPT2	1	InParanoid
WBGene00012782	None	Y43C5A.2	ENSG00000101280	ANGPT4	1	InParanoid
WBGene00012782	None	Y43C5A.2	ENSG00000116194	ANGPTL1	1	InParanoid
WBGene00012782	None	Y43C5A.2	ENSG00000127951	FGL2	1	InParanoid
WBGene00012782	None	Y43C5A.2	ENSG00000136859	ANGPTL2	1	InParanoid
WBGene00012782	None	Y43C5A.2	ENSG00000154188	ANGPT1	1	InParanoid
WBGene00012782	None	Y43C5A.2	ENSG00000171557	FGG	1	InParanoid
WBGene00012782	None	Y43C5A.2	ENSG00000171564	FGB	1	InParanoid
WBGene00012782	None	Y43C5A.2	ENSG00000171819	ANGPTL7	1	InParanoid
WBGene00016190	None	C28G1.5	ENSG00000103313	MEFV	1	InParanoid
WBGene00016190	None	C28G1.5	ENSG00000104228	TRIM35	1	InParanoid
WBGene00016190	None	C28G1.5	ENSG00000112343	TRIM38	1	InParanoid
WBGene00016190	None	C28G1.5	ENSG00000116525	TRIM62	1	InParanoid
WBGene00016190	None	C28G1.5	ENSG00000119411	BSPRY	1	InParanoid
WBGene00016190	None	C28G1.5	ENSG00000121060	TRIM25	1	InParanoid
WBGene00016190	None	C28G1.5	ENSG00000121236	TRIM6	1	InParanoid
WBGene00016190	None	C28G1.5	ENSG00000124900	TRIM51	1	InParanoid
WBGene00016190	None	C28G1.5	ENSG00000128250	RFPL1	1	InParanoid
WBGene00016190	None	C28G1.5	ENSG00000128253	RFPL2	1	InParanoid
WBGene00016190	None	C28G1.5	ENSG00000128276	RFPL3	1	InParanoid
WBGene00016190	None	C28G1.5	ENSG00000132109	TRIM21	1	InParanoid
WBGene00016190	None	C28G1.5	ENSG00000132256	TRIM5	1	InParanoid
WBGene00016190	None	C28G1.5	ENSG00000132274	TRIM22	1	InParanoid
WBGene00016190	None	C28G1.5	ENSG00000137313	TRIM26	1	InParanoid
WBGene00016190	None	C28G1.5	ENSG00000137384	TRIM15	1	InParanoid
WBGene00016190	None	C28G1.5	ENSG00000137394	TRIM10	1	InParanoid
WBGene00016190	None	C28G1.5	ENSG00000137397	TRIM31	1	InParanoid
WBGene00016190	None	C28G1.5	ENSG00000141569	TRIM65	1	InParanoid
WBGene00016190	None	C28G1.5	ENSG00000144010	None	1	InParanoid
WBGene00016190	None	C28G1.5	ENSG00000144015	TRIM43	1	InParanoid
WBGene00016190	None	C28G1.5	ENSG00000146054	TRIM7	1	InParanoid
WBGene00016190	None	C28G1.5	ENSG00000146063	TRIM41	1	InParanoid
WBGene00016190	None	C28G1.5	ENSG00000146755	TRIM50	1	InParanoid
WBGene00016190	None	C28G1.5	ENSG00000146833	TRIM4	1	InParanoid
WBGene00016190	None	C28G1.5	ENSG00000154370	TRIM11	1	InParanoid
WBGene00016190	None	C28G1.5	ENSG00000155428	TRIM74	1	InParanoid
WBGene00016190	None	C28G1.5	ENSG00000162722	TRIM58	1	InParanoid
WBGene00016190	None	C28G1.5	ENSG00000162931	TRIM17	1	InParanoid
WBGene00016190	None	C28G1.5	ENSG00000167333	TRIM68	1	InParanoid
WBGene00016190	None	C28G1.5	ENSG00000168930	TRIM49	1	InParanoid
WBGene00016190	None	C28G1.5	ENSG00000176979	TRIM60	1	InParanoid
WBGene00016190	None	C28G1.5	ENSG00000177238	TRIM72	1	InParanoid
WBGene00016190	None	C28G1.5	ENSG00000178809	TRIM73	1	InParanoid
WBGene00016190	None	C28G1.5	ENSG00000179046	TRIML2	1	InParanoid
WBGene00016190	None	C28G1.5	ENSG00000182053	TRIM49B	1	InParanoid
WBGene00016190	None	C28G1.5	ENSG00000183439	TRIM61	1	InParanoid
WBGene00016190	None	C28G1.5	ENSG00000183718	TRIM52	1	InParanoid
WBGene00016190	None	C28G1.5	ENSG00000184108	TRIML1	1	InParanoid
WBGene00016190	None	C28G1.5	ENSG00000185880	TRIM69	1	InParanoid
WBGene00016190	None	C28G1.5	ENSG00000186628	FSD2	1	InParanoid
WBGene00016190	None	C28G1.5	ENSG00000189253	TRIM64B	1	InParanoid
WBGene00016190	None	C28G1.5	ENSG00000204449	TRIM49C	1	InParanoid
WBGene00016190	None	C28G1.5	ENSG00000204450	TRIM64	1	InParanoid
WBGene00016190	None	C28G1.5	ENSG00000204599	TRIM39	1	InParanoid
WBGene00016190	None	C28G1.5	ENSG00000204610	TRIM15	1	InParanoid
WBGene00016190	None	C28G1.5	ENSG00000204613	TRIM10	1	InParanoid
WBGene00016190	None	C28G1.5	ENSG00000204616	TRIM31	1	InParanoid
WBGene00016190	None	C28G1.5	ENSG00000204618	RNF39	1	InParanoid
WBGene00016190	None	C28G1.5	ENSG00000204713	TRIM27	1	InParanoid
WBGene00016190	None	C28G1.5	ENSG00000206495	TRIM39	1	InParanoid
WBGene00016190	None	C28G1.5	ENSG00000206500	RNF39	1	InParanoid
WBGene00016190	None	C28G1.5	ENSG00000214414	TRIM77	1	InParanoid
WBGene00016190	None	C28G1.5	ENSG00000215641	TRIM27	1	InParanoid
WBGene00016190	None	C28G1.5	ENSG00000223417	TRIM49D1	1	InParanoid
WBGene00016190	None	C28G1.5	ENSG00000223531	TRIM31	1	InParanoid
WBGene00016190	None	C28G1.5	ENSG00000223638	RFPL4A	1	InParanoid
WBGene00016190	None	C28G1.5	ENSG00000224145	TRIM15	1	InParanoid
WBGene00016190	None	C28G1.5	ENSG00000224168	TRIM31	1	InParanoid
WBGene00016190	None	C28G1.5	ENSG00000224994	TRIM39	1	InParanoid
WBGene00016190	None	C28G1.5	ENSG00000225130	TRIM31	1	InParanoid
WBGene00016190	None	C28G1.5	ENSG00000226060	TRIM26	1	InParanoid
WBGene00016190	None	C28G1.5	ENSG00000226437	TRIM39	1	InParanoid
WBGene00016190	None	C28G1.5	ENSG00000227147	TRIM15	1	InParanoid
WBGene00016190	None	C28G1.5	ENSG00000227171	RNF39	1	InParanoid
WBGene00016190	None	C28G1.5	ENSG00000227472	TRIM10	1	InParanoid
WBGene00016190	None	C28G1.5	ENSG00000228881	TRIM26	1	InParanoid
WBGene00016190	None	C28G1.5	ENSG00000229006	TRIM27	1	InParanoid
WBGene00016190	None	C28G1.5	ENSG00000229292	RFPL4AL1	1	InParanoid
WBGene00016190	None	C28G1.5	ENSG00000229346	TRIM10	1	InParanoid
WBGene00016190	None	C28G1.5	ENSG00000229381	TRIM10	1	InParanoid
WBGene00016190	None	C28G1.5	ENSG00000229929	TRIM39	1	InParanoid
WBGene00016190	None	C28G1.5	ENSG00000230230	TRIM26	1	InParanoid
WBGene00016190	None	C28G1.5	ENSG00000230308	TRIM39	1	InParanoid
WBGene00016190	None	C28G1.5	ENSG00000230332	RNF39	1	InParanoid
WBGene00016190	None	C28G1.5	ENSG00000230467	RNF39	1	InParanoid
WBGene00016190	None	C28G1.5	ENSG00000231002	TRIM26	1	InParanoid
WBGene00016190	None	C28G1.5	ENSG00000231641	TRIM26	1	InParanoid
WBGene00016190	None	C28G1.5	ENSG00000232839	TRIM39	1	InParanoid
WBGene00016190	None	C28G1.5	ENSG00000233573	TRIM31	1	InParanoid
WBGene00016190	None	C28G1.5	ENSG00000233599	TRIM15	1	InParanoid
WBGene00016190	None	C28G1.5	ENSG00000233802	TRIM49D2	1	InParanoid
WBGene00016190	None	C28G1.5	ENSG00000234046	TRIM26	1	InParanoid
WBGene00016190	None	C28G1.5	ENSG00000234127	TRIM26	1	InParanoid
WBGene00016190	None	C28G1.5	ENSG00000234495	TRIM27	1	InParanoid
WBGene00016190	None	C28G1.5	ENSG00000235022	RNF39	1	InParanoid
WBGene00016190	None	C28G1.5	ENSG00000235025	TRIM10	1	InParanoid
WBGene00016190	None	C28G1.5	ENSG00000235259	TRIM15	1	InParanoid
WBGene00016190	None	C28G1.5	ENSG00000235905	TRIM15	1	InParanoid
WBGene00016190	None	C28G1.5	ENSG00000235960	TRIM15	1	InParanoid
WBGene00016190	None	C28G1.5	ENSG00000236967	RNF39	1	InParanoid
WBGene00016190	None	C28G1.5	ENSG00000237071	TRIM27	1	InParanoid
WBGene00016190	None	C28G1.5	ENSG00000237192	TRIM10	1	InParanoid
WBGene00016190	None	C28G1.5	ENSG00000237703	TRIM10	1	InParanoid
WBGene00016190	None	C28G1.5	ENSG00000237733	RNF39	1	InParanoid
WBGene00016190	None	C28G1.5	ENSG00000248167	TRIM39-RPP21	1	InParanoid
WBGene00016190	None	C28G1.5	ENSG00000250374	None	1	InParanoid
WBGene00016190	None	C28G1.5	ENSG00000251258	RFPL4B	1	InParanoid
WBGene00016190	None	C28G1.5	ENSG00000258588	TRIM6-TRIM34	1	InParanoid
WBGene00016190	None	C28G1.5	ENSG00000258659	TRIM34	1	InParanoid
WBGene00016190	None	C28G1.5	ENSG00000278211	TRIM69	1	InParanoid
WBGene00017369	None	F10G7.5	ENSG00000174327	SLC16A13	1	OrthoMCL
WBGene00019869	cnnm-2	R04E5.2	ENSG00000119946	CNNM1	2	OrthoInspector|OrthoMCL
WBGene00019895	aagr-2	R05F9.12	ENSG00000171298	GAA	3	InParanoid|OrthoInspector|OrthoMCL
WBGene00017948	mth-1	F31D5.5	ENSG00000144820	ADGRG7	1	InParanoid
WBGene00019813	ger-1	R01H2.5	ENSG00000278243	TSTA3	3	InParanoid|OMA|OrthoInspector
WBGene00019832	osg-1	R02F2.2	ENSG00000074964	ARHGEF10L	1	InParanoid
WBGene00019832	osg-1	R02F2.2	ENSG00000104728	ARHGEF10	1	InParanoid
WBGene00019832	osg-1	R02F2.2	ENSG00000274726	ARHGEF10	1	InParanoid
WBGene00021371	nape-1	Y37E11AR.4	ENSG00000275723	NAPEPLD	3	InParanoid|OMA|OrthoInspector
WBGene00022593	None	ZC328.3	ENSG00000023171	GRAMD1B	3	InParanoid|OrthoInspector|OrthoMCL
WBGene00022593	None	ZC328.3	ENSG00000089351	GRAMD1A	3	InParanoid|OrthoInspector|OrthoMCL
WBGene00022593	None	ZC328.3	ENSG00000178075	GRAMD1C	3	InParanoid|OMA|OrthoInspector
WBGene00000749	col-176	ZC373.7	ENSG00000105327	BBC3	1	OMA
WBGene00019146	None	H02F09.3	ENSG00000181143	MUC16	1	OrthoMCL
WBGene00019273	None	H43E16.1	ENSG00000181143	MUC16	1	OrthoMCL
WBGene00002055	ifc-1	F37B4.2	ENSG00000139648	KRT71	1	OMA
WBGene00002055	ifc-1	F37B4.2	ENSG00000167768	KRT1	1	OMA
WBGene00002055	ifc-1	F37B4.2	ENSG00000185069	KRT76	1	OMA
WBGene00002055	ifc-1	F37B4.2	ENSG00000186442	KRT3	1	OMA
WBGene00006533	tba-7	T28D6.2	ENSG00000183785	TUBA8	1	OrthoMCL
WBGene00019146	None	H02F09.3	ENSG00000205277	MUC12	1	OrthoMCL
WBGene00019273	None	H43E16.1	ENSG00000205277	MUC12	1	OrthoMCL
WBGene00019986	None	R09F10.1	ENSG00000172543	CTSW	1	OMA
WBGene00019592	None	K09F6.9	ENSG00000163207	IVL	1	OMA
WBGene00022572	None	ZC239.14	ENSG00000180332	KCTD4	1	OMA
WBGene00022615	None	ZC449.5	ENSG00000152291	TGOLN2	1	OMA
WBGene00002199	kin-15	M176.6	ENSG00000113721	PDGFRB	1	OrthoInspector
WBGene00006894	ver-1	T17A3.1	ENSG00000113721	PDGFRB	1	OrthoInspector
WBGene00011168	None	R09D1.12	ENSG00000113721	PDGFRB	1	OrthoInspector
WBGene00021745	None	Y50D4B.6	ENSG00000113721	PDGFRB	1	OrthoInspector
WBGene00002199	kin-15	M176.6	ENSG00000122025	FLT3	1	OrthoInspector
WBGene00006894	ver-1	T17A3.1	ENSG00000122025	FLT3	1	OrthoInspector
WBGene00011168	None	R09D1.12	ENSG00000122025	FLT3	1	OrthoInspector
WBGene00021745	None	Y50D4B.6	ENSG00000122025	FLT3	1	OrthoInspector
WBGene00002199	kin-15	M176.6	ENSG00000157404	KIT	1	OrthoInspector
WBGene00006894	ver-1	T17A3.1	ENSG00000157404	KIT	1	OrthoInspector
WBGene00011168	None	R09D1.12	ENSG00000157404	KIT	1	OrthoInspector
WBGene00021745	None	Y50D4B.6	ENSG00000157404	KIT	1	OrthoInspector
WBGene00002199	kin-15	M176.6	ENSG00000182578	CSF1R	1	OrthoInspector
WBGene00006894	ver-1	T17A3.1	ENSG00000182578	CSF1R	1	OrthoInspector
WBGene00011168	None	R09D1.12	ENSG00000182578	CSF1R	1	OrthoInspector
WBGene00021745	None	Y50D4B.6	ENSG00000182578	CSF1R	1	OrthoInspector
WBGene00002999	lin-10	C09H6.2	ENSG00000276495	APBA2	1	OrthoInspector
WBGene00022801	pcp-5	ZK688.6	ENSG00000176978	DPP7	1	OrthoInspector
WBGene00004316	rbf-1	F37A4.7	ENSG00000272670	DOC2B	1	OrthoInspector
WBGene00019895	aagr-2	R05F9.12	ENSG00000278563	MGAM2	1	OrthoInspector
WBGene00019146	None	H02F09.3	ENSG00000110799	VWF	1	OrthoMCL
WBGene00019273	None	H43E16.1	ENSG00000110799	VWF	1	OrthoMCL
WBGene00019146	None	H02F09.3	ENSG00000117983	MUC5B	1	OrthoMCL
WBGene00019273	None	H43E16.1	ENSG00000117983	MUC5B	1	OrthoMCL
WBGene00019146	None	H02F09.3	ENSG00000165899	OTOGL	1	OrthoMCL
WBGene00019273	None	H43E16.1	ENSG00000165899	OTOGL	1	OrthoMCL
WBGene00019146	None	H02F09.3	ENSG00000169876	MUC17	1	OrthoMCL
WBGene00019273	None	H43E16.1	ENSG00000169876	MUC17	1	OrthoMCL
WBGene00019146	None	H02F09.3	ENSG00000184956	MUC6	1	OrthoMCL
WBGene00019273	None	H43E16.1	ENSG00000184956	MUC6	1	OrthoMCL
WBGene00019146	None	H02F09.3	ENSG00000188162	OTOG	1	OrthoMCL
WBGene00019273	None	H43E16.1	ENSG00000188162	OTOG	1	OrthoMCL
WBGene00019146	None	H02F09.3	ENSG00000197558	SSPO	1	OrthoMCL
WBGene00019273	None	H43E16.1	ENSG00000197558	SSPO	1	OrthoMCL
WBGene00019146	None	H02F09.3	ENSG00000198788	None	1	OrthoMCL
WBGene00019273	None	H43E16.1	ENSG00000198788	None	1	OrthoMCL
WBGene00019146	None	H02F09.3	ENSG00000205592	None	1	OrthoMCL
WBGene00019273	None	H43E16.1	ENSG00000205592	None	1	OrthoMCL
WBGene00001502	ftt-2	F52D10.3	ENSG00000108953	YWHAE	1	OrthoMCL
WBGene00001883	his-9	ZK131.3	ENSG00000178458	None	1	OrthoMCL
WBGene00001887	his-13	ZK131.7	ENSG00000178458	None	1	OrthoMCL
WBGene00001899	his-25	ZK131.2	ENSG00000178458	None	1	OrthoMCL
WBGene00006533	tba-7	T28D6.2	ENSG00000214391	None	1	OrthoMCL
WBGene00003411	mrp-5	F14F4.3	ENSG00000006071	ABCC8	1	OrthoMCL
WBGene00003412	mrp-6	F20B6.3	ENSG00000006071	ABCC8	1	OrthoMCL
WBGene00003411	mrp-5	F14F4.3	ENSG00000069431	ABCC9	1	OrthoMCL
WBGene00003412	mrp-6	F20B6.3	ENSG00000069431	ABCC9	1	OrthoMCL
WBGene00003411	mrp-5	F14F4.3	ENSG00000124574	ABCC10	1	OrthoMCL
WBGene00003412	mrp-6	F20B6.3	ENSG00000124574	ABCC10	1	OrthoMCL
WBGene00013492	None	Y70C5C.1	ENSG00000078618	NRDC	1	OrthoMCL
WBGene00000562	cng-1	F14H8.6	ENSG00000132259	CNGA4	0	Legacy Ortholist
WBGene00000562	cng-1	F14H8.6	ENSG00000144191	CNGA3	0	Legacy Ortholist
WBGene00000562	cng-1	F14H8.6	ENSG00000183862	CNGA2	0	Legacy Ortholist
WBGene00000562	cng-1	F14H8.6	ENSG00000198515	CNGA1	0	Legacy Ortholist
WBGene00004057	pmk-3	F42G8.4	ENSG00000112062	MAPK14	0	Legacy Ortholist
WBGene00004057	pmk-3	F42G8.4	ENSG00000156711	MAPK13	0	Legacy Ortholist
WBGene00004057	pmk-3	F42G8.4	ENSG00000185386	MAPK11	0	Legacy Ortholist
WBGene00004057	pmk-3	F42G8.4	ENSG00000188130	MAPK12	0	Legacy Ortholist
WBGene00004509	rrf-2	M01G12.12	ENSG00000166816	LDHD	0	Legacy Ortholist
WBGene00008891	clec-42	F16H6.1	ENSG00000123610	TNFAIP6	0	Legacy Ortholist
WBGene00012121	None	T28C6.7	ENSG00000058453	CROCC	0	Legacy Ortholist
WBGene00012121	None	T28C6.7	ENSG00000126001	CEP250	0	Legacy Ortholist
WBGene00012121	None	T28C6.7	ENSG00000198707	None	0	Legacy Ortholist
WBGene00012121	None	T28C6.7	ENSG00000226321	CROCC2	0	Legacy Ortholist
WBGene00012757	None	Y41C4A.11	ENSG00000184432	COPB2	0	Legacy Ortholist
WBGene00015559	npr-17	C06G4.5	ENSG00000128285	MCHR1	0	Legacy Ortholist
WBGene00015559	npr-17	C06G4.5	ENSG00000152034	MCHR2	0	Legacy Ortholist
WBGene00016997	cebp-1	D1005.3	ENSG00000092067	CEBPE	0	Legacy Ortholist
WBGene00016997	cebp-1	D1005.3	ENSG00000221869	CEBPD	0	Legacy Ortholist
WBGene00019917	clec-43	R07C3.1	ENSG00000123610	TNFAIP6	0	Legacy Ortholist

## Sheet: hsf-1 regulated genes
S8 Table - Ortholist results of: IPR genes; genes up in both pals-22/N2 and pals-22/pals-25 comparisons; and genes regulated by hsf-1*.
All gene lists use WS263 annotation
WormBase_ID	Common_Name	Locus_ID	Ensembl_ID	HGNC_Symbol	No. of Matched Databases	Matched_Databases		Unique genes
WBGene00000039	acn-1	C42D8.5	ENSG00000130234	ACE2	5	Ensembl Compara 87-89|Homologene|InParanoid|OMA|OrthoInspector		WBGene00000039
WBGene00000039	acn-1	C42D8.5	ENSG00000147003	TMEM27	1	Ensembl Compara 87-89		WBGene00000074
WBGene00000039	acn-1	C42D8.5	ENSG00000159640	ACE	3	Ensembl Compara 87-89|OrthoInspector|OrthoMCL		WBGene00000149
WBGene00000039	acn-1	C42D8.5	ENSG00000264813	None	2	Ensembl Compara 87-89|OMA		WBGene00000197
WBGene00000074	adm-2	C04A11.4	ENSG00000042980	ADAM28	3	Ensembl Compara 87-89|InParanoid|OrthoInspector		WBGene00000248
WBGene00000074	adm-2	C04A11.4	ENSG00000069206	ADAM7	2	Ensembl Compara 87-89|OrthoInspector		WBGene00000277
WBGene00000074	adm-2	C04A11.4	ENSG00000104755	ADAM2	1	Ensembl Compara 87-89		WBGene00000293
WBGene00000074	adm-2	C04A11.4	ENSG00000134007	ADAM20	2	Ensembl Compara 87-89|OrthoInspector		WBGene00000373
WBGene00000074	adm-2	C04A11.4	ENSG00000134249	ADAM30	2	Ensembl Compara 87-89|OrthoInspector		WBGene00000399
WBGene00000074	adm-2	C04A11.4	ENSG00000135074	ADAM19	4	Ensembl Compara 87-89|InParanoid|OrthoInspector|OrthoMCL		WBGene00000415
WBGene00000074	adm-2	C04A11.4	ENSG00000139985	ADAM21	2	Ensembl Compara 87-89|OrthoInspector		WBGene00000421
WBGene00000074	adm-2	C04A11.4	ENSG00000143537	ADAM15	2	Ensembl Compara 87-89|InParanoid		WBGene00000458
WBGene00000074	adm-2	C04A11.4	ENSG00000148848	ADAM12	5	Ensembl Compara 87-89|Homologene|InParanoid|OrthoInspector|OrthoMCL		WBGene00000473
WBGene00000074	adm-2	C04A11.4	ENSG00000149451	ADAM33	4	Ensembl Compara 87-89|InParanoid|OrthoInspector|OrthoMCL		WBGene00000509
WBGene00000074	adm-2	C04A11.4	ENSG00000151651	ADAM8	3	Ensembl Compara 87-89|InParanoid|OrthoInspector		WBGene00000519
WBGene00000074	adm-2	C04A11.4	ENSG00000168594	ADAM29	2	Ensembl Compara 87-89|OrthoInspector		WBGene00000545
WBGene00000074	adm-2	C04A11.4	ENSG00000168615	ADAM9	4	Ensembl Compara 87-89|InParanoid|OMA|OrthoInspector		WBGene00000548
WBGene00000074	adm-2	C04A11.4	ENSG00000168619	ADAM18	1	Ensembl Compara 87-89		WBGene00000603
WBGene00000074	adm-2	C04A11.4	ENSG00000197140	ADAM32	1	Ensembl Compara 87-89		WBGene00000699
WBGene00000149	apl-1	C42D8.8	ENSG00000084234	APLP2	5	Ensembl Compara 87-89|InParanoid|OMA|OrthoInspector|OrthoMCL		WBGene00000718
WBGene00000149	apl-1	C42D8.8	ENSG00000105290	APLP1	3	Ensembl Compara 87-89|InParanoid|OrthoInspector		WBGene00000734
WBGene00000149	apl-1	C42D8.8	ENSG00000142192	APP	5	Ensembl Compara 87-89|Homologene|OMA|OrthoInspector|OrthoMCL		WBGene00000745
WBGene00000197	aars-2	F28H1.3	ENSG00000124608	AARS2	1	OrthoMCL		WBGene00000784
WBGene00000197	aars-2	F28H1.3	ENSG00000090861	AARS	6	Ensembl Compara 87-89|Homologene|InParanoid|OMA|OrthoInspector|OrthoMCL		WBGene00000962
WBGene00000248	ben-1	C54C6.2	ENSG00000198211	None	2	Ensembl Compara 87-89|OrthoMCL		WBGene00000963
WBGene00000248	ben-1	C54C6.2	ENSG00000258947	TUBB3	1	Ensembl Compara 87-89		WBGene00001172
WBGene00000248	ben-1	C54C6.2	ENSG00000176014	TUBB6	1	OrthoMCL		WBGene00001178
WBGene00000248	ben-1	C54C6.2	ENSG00000196230	TUBB	2	Homologene|OrthoMCL		WBGene00001189
WBGene00000248	ben-1	C54C6.2	ENSG00000137285	TUBB2B	1	OrthoMCL		WBGene00001489
WBGene00000248	ben-1	C54C6.2	ENSG00000188229	TUBB4B	1	OrthoMCL		WBGene00001493
WBGene00000248	ben-1	C54C6.2	ENSG00000104833	TUBB4A	1	OrthoMCL		WBGene00001502
WBGene00000248	ben-1	C54C6.2	ENSG00000137267	TUBB2A	1	OrthoMCL		WBGene00001577
WBGene00000248	ben-1	C54C6.2	ENSG00000183311	TUBB	1	OrthoMCL		WBGene00001607
WBGene00000248	ben-1	C54C6.2	ENSG00000224156	TUBB	1	OrthoMCL		WBGene00001648
WBGene00000248	ben-1	C54C6.2	ENSG00000227739	TUBB	1	OrthoMCL		WBGene00001812
WBGene00000248	ben-1	C54C6.2	ENSG00000229684	TUBB	1	OrthoMCL		WBGene00001946
WBGene00000248	ben-1	C54C6.2	ENSG00000232421	TUBB	1	OrthoMCL		WBGene00001994
WBGene00000248	ben-1	C54C6.2	ENSG00000232575	TUBB	1	OrthoMCL		WBGene00002024
WBGene00000248	ben-1	C54C6.2	ENSG00000235067	TUBB	1	OrthoMCL		WBGene00002048
WBGene00000248	ben-1	C54C6.2	ENSG00000101162	TUBB1	1	OrthoMCL		WBGene00002240
WBGene00000248	ben-1	C54C6.2	ENSG00000127589	None	1	OrthoMCL		WBGene00002250
WBGene00000248	ben-1	C54C6.2	ENSG00000159247	None	1	OrthoMCL		WBGene00002271
WBGene00000248	ben-1	C54C6.2	ENSG00000173213	None	1	OrthoMCL		WBGene00002299
WBGene00000248	ben-1	C54C6.2	ENSG00000173876	None	1	OrthoMCL		WBGene00002694
WBGene00000277	cab-1	C23H4.1	ENSG00000107281	NPDC1	2	Ensembl Compara 87-89|OrthoMCL		WBGene00002783
WBGene00000293	cap-2	M106.5	ENSG00000077549	CAPZB	6	Ensembl Compara 87-89|Homologene|InParanoid|OMA|OrthoInspector|OrthoMCL		WBGene00002980
WBGene00000373	cyp-14A5	F08F3.7	ENSG00000100197	CYP2D6	2	Ensembl Compara 87-89|InParanoid		WBGene00002981
WBGene00000373	cyp-14A5	F08F3.7	ENSG00000134716	CYP2J2	3	Ensembl Compara 87-89|Homologene|OrthoMCL		WBGene00003002
WBGene00000373	cyp-14A5	F08F3.7	ENSG00000155016	CYP2U1	3	Ensembl Compara 87-89|InParanoid|OrthoMCL		WBGene00003055
WBGene00000373	cyp-14A5	F08F3.7	ENSG00000186104	CYP2R1	1	Ensembl Compara 87-89		WBGene00003071
WBGene00000373	cyp-14A5	F08F3.7	ENSG00000205702	CYP2D7	1	Ensembl Compara 87-89		WBGene00003072
WBGene00000373	cyp-14A5	F08F3.7	ENSG00000073067	CYP2W1	1	InParanoid		WBGene00003185
WBGene00000373	cyp-14A5	F08F3.7	ENSG00000275211	CYP2D6	1	InParanoid		WBGene00003196
WBGene00000373	cyp-14A5	F08F3.7	ENSG00000108242	CYP2C18	1	OrthoMCL		WBGene00003243
WBGene00000373	cyp-14A5	F08F3.7	ENSG00000138109	CYP2C9	1	OrthoMCL		WBGene00003247
WBGene00000373	cyp-14A5	F08F3.7	ENSG00000138115	CYP2C8	1	OrthoMCL		WBGene00003402
WBGene00000373	cyp-14A5	F08F3.7	ENSG00000165841	CYP2C19	1	OrthoMCL		WBGene00003408
WBGene00000373	cyp-14A5	F08F3.7	ENSG00000197408	CYP2B6	1	OrthoMCL		WBGene00003423
WBGene00000399	cdh-7	R05H10.6	ENSG00000150275	PCDH15	1	Ensembl Compara 87-89		WBGene00003476
WBGene00000399	cdh-7	R05H10.6	ENSG00000113209	PCDHB5	1	Ensembl Compara 87-89		WBGene00003482
WBGene00000399	cdh-7	R05H10.6	ENSG00000253767	PCDHGA8	1	Ensembl Compara 87-89		WBGene00003485
WBGene00000399	cdh-7	R05H10.6	ENSG00000253910	PCDHGB2	1	Ensembl Compara 87-89		WBGene00003497
WBGene00000399	cdh-7	R05H10.6	ENSG00000254122	PCDHGB7	1	Ensembl Compara 87-89		WBGene00003561
WBGene00000399	cdh-7	R05H10.6	ENSG00000254245	PCDHGA3	1	Ensembl Compara 87-89		WBGene00003588
WBGene00000399	cdh-7	R05H10.6	ENSG00000262209	PCDHGB3	1	Ensembl Compara 87-89		WBGene00003593
WBGene00000415	ced-1	Y47H9C.4	ENSG00000074660	SCARF1	1	Ensembl Compara 87-89		WBGene00003731
WBGene00000415	ced-1	Y47H9C.4	ENSG00000145794	MEGF10	5	Ensembl Compara 87-89|InParanoid|OMA|OrthoInspector|OrthoMCL		WBGene00003733
WBGene00000415	ced-1	Y47H9C.4	ENSG00000157890	MEGF11	5	Ensembl Compara 87-89|Homologene|InParanoid|OrthoInspector|OrthoMCL		WBGene00003930
WBGene00000415	ced-1	Y47H9C.4	ENSG00000187800	PEAR1	4	Ensembl Compara 87-89|InParanoid|OrthoInspector|OrthoMCL		WBGene00003943
WBGene00000415	ced-1	Y47H9C.4	ENSG00000244486	SCARF2	1	Ensembl Compara 87-89		WBGene00003989
WBGene00000415	ced-1	Y47H9C.4	ENSG00000162591	MEGF6	1	OrthoMCL		WBGene00004025
WBGene00000421	ced-7	C48B4.4	ENSG00000064687	ABCA7	1	OrthoMCL		WBGene00004083
WBGene00000421	ced-7	C48B4.4	ENSG00000107331	ABCA2	1	OrthoMCL		WBGene00004208
WBGene00000421	ced-7	C48B4.4	ENSG00000141338	ABCA8	2	Ensembl Compara 87-89|OrthoMCL		WBGene00004264
WBGene00000421	ced-7	C48B4.4	ENSG00000144452	ABCA12	1	OrthoMCL		WBGene00004300
WBGene00000421	ced-7	C48B4.4	ENSG00000154258	ABCA9	2	Ensembl Compara 87-89|OrthoMCL		WBGene00004397
WBGene00000421	ced-7	C48B4.4	ENSG00000154262	ABCA6	2	Ensembl Compara 87-89|OrthoMCL		WBGene00004408
WBGene00000421	ced-7	C48B4.4	ENSG00000154263	ABCA10	2	Ensembl Compara 87-89|OrthoMCL		WBGene00004409
WBGene00000421	ced-7	C48B4.4	ENSG00000154265	ABCA5	2	Ensembl Compara 87-89|OrthoMCL		WBGene00004470
WBGene00000421	ced-7	C48B4.4	ENSG00000165029	ABCA1	1	OrthoMCL		WBGene00004477
WBGene00000421	ced-7	C48B4.4	ENSG00000179869	ABCA13	1	OrthoMCL		WBGene00004749
WBGene00000421	ced-7	C48B4.4	ENSG00000198691	ABCA4	1	OrthoMCL		WBGene00004798
WBGene00000421	ced-7	C48B4.4	ENSG00000167972	ABCA3	1	OrthoMCL		WBGene00004827
WBGene00000458	ceh-37	C37E2.5	ENSG00000105392	CRX	2	Ensembl Compara 87-89|OrthoMCL		WBGene00004829
WBGene00000458	ceh-37	C37E2.5	ENSG00000115507	OTX1	1	Ensembl Compara 87-89		WBGene00004855
WBGene00000458	ceh-37	C37E2.5	ENSG00000165588	OTX2	1	Ensembl Compara 87-89		WBGene00004892
WBGene00000473	cey-2	F46F11.2	ENSG00000006047	YBX2	2	Ensembl Compara 87-89|InParanoid		WBGene00004897
WBGene00000473	cey-2	F46F11.2	ENSG00000060138	YBX3	2	Ensembl Compara 87-89|InParanoid		WBGene00005016
WBGene00000473	cey-2	F46F11.2	ENSG00000065978	YBX1	2	Ensembl Compara 87-89|InParanoid		WBGene00005648
WBGene00000509	cka-1	C28D4.2	ENSG00000100288	CHKB	3	Ensembl Compara 87-89|Homologene|OMA		WBGene00005663
WBGene00000509	cka-1	C28D4.2	ENSG00000110721	CHKA	2	Ensembl Compara 87-89|OMA		WBGene00006324
WBGene00000509	cka-1	C28D4.2	ENSG00000254413	CHKB-CPT1B	1	Ensembl Compara 87-89		WBGene00006331
WBGene00000519	cku-70	Y47D3A.4	ENSG00000196419	XRCC6	6	Ensembl Compara 87-89|Homologene|InParanoid|OMA|OrthoInspector|OrthoMCL		WBGene00006372
WBGene00000545	clp-4	Y39A3CL.5	ENSG00000014216	CAPN1	4	Ensembl Compara 87-89|InParanoid|OrthoInspector|OrthoMCL		WBGene00006528
WBGene00000545	clp-4	Y39A3CL.5	ENSG00000092529	CAPN3	4	Ensembl Compara 87-89|InParanoid|OrthoInspector|OrthoMCL		WBGene00006539
WBGene00000545	clp-4	Y39A3CL.5	ENSG00000135773	CAPN9	5	Ensembl Compara 87-89|InParanoid|OMA|OrthoInspector|OrthoMCL		WBGene00006575
WBGene00000545	clp-4	Y39A3CL.5	ENSG00000137225	CAPN11	5	Ensembl Compara 87-89|InParanoid|OMA|OrthoInspector|OrthoMCL		WBGene00006578
WBGene00000545	clp-4	Y39A3CL.5	ENSG00000162909	CAPN2	5	Ensembl Compara 87-89|InParanoid|OMA|OrthoInspector|OrthoMCL		WBGene00006649
WBGene00000545	clp-4	Y39A3CL.5	ENSG00000203697	CAPN8	6	Ensembl Compara 87-89|Homologene|InParanoid|OMA|OrthoInspector|OrthoMCL		WBGene00006727
WBGene00000545	clp-4	Y39A3CL.5	ENSG00000182472	CAPN12	1	OrthoInspector		WBGene00006840
WBGene00000548	clr-1	F56D1.4	ENSG00000081237	PTPRC	1	Ensembl Compara 87-89		WBGene00007010
WBGene00000548	clr-1	F56D1.4	ENSG00000110786	PTPN5	1	Ensembl Compara 87-89		WBGene00007114
WBGene00000548	clr-1	F56D1.4	ENSG00000143851	PTPN7	1	Ensembl Compara 87-89		WBGene00007414
WBGene00000548	clr-1	F56D1.4	ENSG00000153233	PTPRR	1	Ensembl Compara 87-89		WBGene00007505
WBGene00000603	col-14	C46A5.3	ENSG00000065618	COL17A1	1	Ensembl Compara 87-89		WBGene00007666
WBGene00000603	col-14	C46A5.3	ENSG00000019169	MARCO	1	InParanoid		WBGene00007772
WBGene00000699	col-125	C29F4.1	ENSG00000019169	MARCO	1	InParanoid		WBGene00008183
WBGene00000718	col-145	B0222.7	ENSG00000133661	SFTPD	1	InParanoid		WBGene00008252
WBGene00000734	col-161	C50B6.4	ENSG00000133661	SFTPD	1	InParanoid		WBGene00008601
WBGene00000745	col-172	F38B6.5	ENSG00000019169	MARCO	1	InParanoid		WBGene00008748
WBGene00000784	cpr-4	F44C4.3	ENSG00000164733	CTSB	4	Ensembl Compara 87-89|OMA|OrthoInspector|OrthoMCL		WBGene00008891
WBGene00000962	dhc-1	T21E12.4	ENSG00000187240	DYNC2H1	1	OrthoMCL		WBGene00009032
WBGene00000962	dhc-1	T21E12.4	ENSG00000197102	DYNC1H1	6	Ensembl Compara 87-89|Homologene|InParanoid|OMA|OrthoInspector|OrthoMCL		WBGene00009050
WBGene00000962	dhc-1	T21E12.4	ENSG00000007174	DNAH9	1	OrthoMCL		WBGene00009164
WBGene00000962	dhc-1	T21E12.4	ENSG00000115423	DNAH6	1	OrthoMCL		WBGene00009369
WBGene00000962	dhc-1	T21E12.4	ENSG00000118997	DNAH7	1	OrthoMCL		WBGene00009435
WBGene00000962	dhc-1	T21E12.4	ENSG00000039139	DNAH5	1	OrthoMCL		WBGene00009500
WBGene00000962	dhc-1	T21E12.4	ENSG00000105877	DNAH11	1	OrthoMCL		WBGene00009574
WBGene00000962	dhc-1	T21E12.4	ENSG00000114841	DNAH1	1	OrthoMCL		WBGene00010047
WBGene00000962	dhc-1	T21E12.4	ENSG00000124721	DNAH8	1	OrthoMCL		WBGene00010556
WBGene00000962	dhc-1	T21E12.4	ENSG00000158486	DNAH3	1	OrthoMCL		WBGene00010641
WBGene00000962	dhc-1	T21E12.4	ENSG00000174844	DNAH12	1	OrthoMCL		WBGene00010700
WBGene00000962	dhc-1	T21E12.4	ENSG00000183914	DNAH2	1	OrthoMCL		WBGene00010701
WBGene00000962	dhc-1	T21E12.4	ENSG00000185842	DNAH14	1	OrthoMCL		WBGene00010731
WBGene00000962	dhc-1	T21E12.4	ENSG00000187775	DNAH17	1	OrthoMCL		WBGene00010828
WBGene00000962	dhc-1	T21E12.4	ENSG00000197653	DNAH10	1	OrthoMCL		WBGene00011304
WBGene00000963	dhp-1	R06C7.3	ENSG00000072832	CRMP1	4	Ensembl Compara 87-89|InParanoid|OrthoInspector|OrthoMCL		WBGene00011449
WBGene00000963	dhp-1	R06C7.3	ENSG00000092964	DPYSL2	4	Ensembl Compara 87-89|InParanoid|OrthoInspector|OrthoMCL		WBGene00011833
WBGene00000963	dhp-1	R06C7.3	ENSG00000113657	DPYSL3	4	Ensembl Compara 87-89|InParanoid|OrthoInspector|OrthoMCL		WBGene00011966
WBGene00000963	dhp-1	R06C7.3	ENSG00000147647	DPYS	6	Ensembl Compara 87-89|Homologene|InParanoid|OMA|OrthoInspector|OrthoMCL		WBGene00012097
WBGene00000963	dhp-1	R06C7.3	ENSG00000151640	DPYSL4	3	Ensembl Compara 87-89|OrthoInspector|OrthoMCL		WBGene00012664
WBGene00000963	dhp-1	R06C7.3	ENSG00000157851	DPYSL5	2	Ensembl Compara 87-89|OrthoInspector		WBGene00012688
WBGene00001172	egl-3	C51E3.7	ENSG00000125851	PCSK2	6	Ensembl Compara 87-89|Homologene|InParanoid|OMA|OrthoInspector|OrthoMCL		WBGene00012757
WBGene00001178	egl-9	F22E12.4	ENSG00000129521	EGLN3	2	Ensembl Compara 87-89|OrthoInspector		WBGene00012782
WBGene00001178	egl-9	F22E12.4	ENSG00000135766	EGLN1	3	Ensembl Compara 87-89|OrthoInspector|OrthoMCL		WBGene00013034
WBGene00001178	egl-9	F22E12.4	ENSG00000268797	None	1	Ensembl Compara 87-89		WBGene00013073
WBGene00001178	egl-9	F22E12.4	ENSG00000269858	EGLN2	2	Ensembl Compara 87-89|OrthoInspector		WBGene00014013
WBGene00001189	egl-21	F01D4.4	ENSG00000088882	CPXM1	3	Ensembl Compara 87-89|InParanoid|OrthoInspector		WBGene00014171
WBGene00001189	egl-21	F01D4.4	ENSG00000106624	AEBP1	1	Ensembl Compara 87-89		WBGene00015159
WBGene00001189	egl-21	F01D4.4	ENSG00000109472	CPE	6	Ensembl Compara 87-89|Homologene|InParanoid|OMA|OrthoInspector|OrthoMCL		WBGene00015251
WBGene00001189	egl-21	F01D4.4	ENSG00000109625	CPZ	3	Ensembl Compara 87-89|InParanoid|OrthoInspector		WBGene00015278
WBGene00001189	egl-21	F01D4.4	ENSG00000120054	CPN1	4	Ensembl Compara 87-89|InParanoid|OMA|OrthoInspector		WBGene00015350
WBGene00001189	egl-21	F01D4.4	ENSG00000121898	CPXM2	3	Ensembl Compara 87-89|InParanoid|OrthoInspector		WBGene00015510
WBGene00001489	frm-2	T04C9.6	ENSG00000095203	EPB41L4B	3	Ensembl Compara 87-89|InParanoid|OrthoInspector		WBGene00015561
WBGene00001489	frm-2	T04C9.6	ENSG00000115109	EPB41L5	4	Ensembl Compara 87-89|InParanoid|OrthoInspector|OrthoMCL		WBGene00015776
WBGene00001493	frm-7	C51F7.1	ENSG00000139926	FRMD6	3	Ensembl Compara 87-89|OrthoInspector|OrthoMCL		WBGene00015955
WBGene00001493	frm-7	C51F7.1	ENSG00000153303	FRMD1	1	Ensembl Compara 87-89		WBGene00016064
WBGene00001502	ftt-2	F52D10.3	ENSG00000128245	YWHAH	1	Ensembl Compara 87-89		WBGene00016406
WBGene00001502	ftt-2	F52D10.3	ENSG00000134308	YWHAQ	2	Ensembl Compara 87-89|OrthoInspector		WBGene00016407
WBGene00001502	ftt-2	F52D10.3	ENSG00000164924	YWHAZ	6	Ensembl Compara 87-89|Homologene|InParanoid|OMA|OrthoInspector|OrthoMCL		WBGene00016489
WBGene00001502	ftt-2	F52D10.3	ENSG00000166913	YWHAB	5	Ensembl Compara 87-89|InParanoid|OMA|OrthoInspector|OrthoMCL		WBGene00016507
WBGene00001502	ftt-2	F52D10.3	ENSG00000170027	YWHAG	1	Ensembl Compara 87-89		WBGene00016769
WBGene00001502	ftt-2	F52D10.3	ENSG00000175793	SFN	1	Ensembl Compara 87-89		WBGene00016845
WBGene00001502	ftt-2	F52D10.3	ENSG00000108953	YWHAE	1	OrthoMCL		WBGene00016968
WBGene00001577	gem-4	T12A7.1	ENSG00000124772	CPNE5	6	Ensembl Compara 87-89|Homologene|InParanoid|OMA|OrthoInspector|OrthoMCL		WBGene00016997
WBGene00001577	gem-4	T12A7.1	ENSG00000139117	CPNE8	5	Ensembl Compara 87-89|InParanoid|OMA|OrthoInspector|OrthoMCL		WBGene00017016
WBGene00001577	gem-4	T12A7.1	ENSG00000144550	CPNE9	4	Ensembl Compara 87-89|InParanoid|OrthoInspector|OrthoMCL		WBGene00017028
WBGene00001577	gem-4	T12A7.1	ENSG00000085719	CPNE3	4	InParanoid|OMA|OrthoInspector|OrthoMCL		WBGene00017045
WBGene00001577	gem-4	T12A7.1	ENSG00000100884	CPNE6	1	OrthoInspector		WBGene00017571
WBGene00001577	gem-4	T12A7.1	ENSG00000140848	CPNE2	3	InParanoid|OrthoInspector|OrthoMCL		WBGene00017705
WBGene00001577	gem-4	T12A7.1	ENSG00000196353	CPNE4	2	InParanoid|OrthoInspector		WBGene00018011
WBGene00001577	gem-4	T12A7.1	ENSG00000214078	CPNE1	3	InParanoid|OrthoInspector|OrthoMCL		WBGene00018294
WBGene00001607	gln-6	C28D4.3	ENSG00000135821	GLUL	1	Ensembl Compara 87-89		WBGene00018564
WBGene00001648	goa-1	C26C6.2	ENSG00000087258	GNAO1	6	Ensembl Compara 87-89|Homologene|InParanoid|OMA|OrthoInspector|OrthoMCL		WBGene00018738
WBGene00001648	goa-1	C26C6.2	ENSG00000065135	GNAI3	1	OrthoMCL		WBGene00018953
WBGene00001648	goa-1	C26C6.2	ENSG00000114353	GNAI2	1	OrthoMCL		WBGene00019006
WBGene00001648	goa-1	C26C6.2	ENSG00000127955	GNAI1	1	OrthoMCL		WBGene00019146
WBGene00001648	goa-1	C26C6.2	ENSG00000134183	GNAT2	1	OrthoMCL		WBGene00019273
WBGene00001648	goa-1	C26C6.2	ENSG00000214415	GNAT3	1	OrthoMCL		WBGene00019298
WBGene00001812	haf-2	F43E2.4	ENSG00000150967	ABCB9	4	Ensembl Compara 87-89|Homologene|OrthoInspector|OrthoMCL		WBGene00019686
WBGene00001812	haf-2	F43E2.4	ENSG00000168394	TAP1	1	Ensembl Compara 87-89		WBGene00019748
WBGene00001812	haf-2	F43E2.4	ENSG00000204267	TAP2	1	Ensembl Compara 87-89		WBGene00019782
WBGene00001812	haf-2	F43E2.4	ENSG00000250264	None	1	Ensembl Compara 87-89		WBGene00019823
WBGene00001946	his-72	Y49E10.6	ENSG00000197153	HIST1H3J	1	OrthoMCL		WBGene00019831
WBGene00001946	his-72	Y49E10.6	ENSG00000197409	HIST1H3D	1	OrthoMCL		WBGene00019844
WBGene00001946	his-72	Y49E10.6	ENSG00000203818	HIST2H3PS2	1	OrthoMCL		WBGene00019895
WBGene00001946	his-72	Y49E10.6	ENSG00000132475	H3F3B	2	OrthoInspector|OrthoMCL		WBGene00019902
WBGene00001946	his-72	Y49E10.6	ENSG00000163041	H3F3A	2	OrthoInspector|OrthoMCL		WBGene00019946
WBGene00001946	his-72	Y49E10.6	ENSG00000188375	H3F3C	1	Homologene		WBGene00020481
WBGene00001946	his-72	Y49E10.6	ENSG00000183598	HIST2H3D	1	OrthoMCL		WBGene00020784
WBGene00001946	his-72	Y49E10.6	ENSG00000203811	HIST2H3C	1	OrthoMCL		WBGene00021121
WBGene00001946	his-72	Y49E10.6	ENSG00000203852	HIST2H3A	1	OrthoMCL		WBGene00021469
WBGene00001946	his-72	Y49E10.6	ENSG00000178458	None	1	OrthoMCL		WBGene00021475
WBGene00001994	hpk-1	F20B6.8	ENSG00000064393	HIPK2	3	Ensembl Compara 87-89|OrthoInspector|OrthoMCL		WBGene00021883
WBGene00001994	hpk-1	F20B6.8	ENSG00000110422	HIPK3	3	Ensembl Compara 87-89|OrthoInspector|OrthoMCL		WBGene00021927
WBGene00001994	hpk-1	F20B6.8	ENSG00000163349	HIPK1	3	Ensembl Compara 87-89|OrthoInspector|OrthoMCL		WBGene00022078
WBGene00002024	hsp-43	C14F11.5	ENSG00000004776	HSPB6	1	Ensembl Compara 87-89		WBGene00022425
WBGene00002024	hsp-43	C14F11.5	ENSG00000106211	HSPB1	1	Ensembl Compara 87-89		WBGene00022499
WBGene00002024	hsp-43	C14F11.5	ENSG00000109846	CRYAB	1	Ensembl Compara 87-89		WBGene00022570
WBGene00002024	hsp-43	C14F11.5	ENSG00000152137	HSPB8	1	Ensembl Compara 87-89		WBGene00022797
WBGene00002024	hsp-43	C14F11.5	ENSG00000160202	CRYAA	1	Ensembl Compara 87-89
WBGene00002024	hsp-43	C14F11.5	ENSG00000169271	HSPB3	1	Ensembl Compara 87-89
WBGene00002024	hsp-43	C14F11.5	ENSG00000170276	HSPB2	1	Ensembl Compara 87-89
WBGene00002024	hsp-43	C14F11.5	ENSG00000254445	HSPB2-C11orf52	1	Ensembl Compara 87-89
WBGene00002024	hsp-43	C14F11.5	ENSG00000276076	None	1	Ensembl Compara 87-89
WBGene00002048	ida-1	B0244.2	ENSG00000054356	PTPRN	4	Ensembl Compara 87-89|InParanoid|OrthoInspector|OrthoMCL
WBGene00002048	ida-1	B0244.2	ENSG00000155093	PTPRN2	4	Ensembl Compara 87-89|InParanoid|OrthoInspector|OrthoMCL
WBGene00002240	ksr-2	F58D5.4	ENSG00000141068	KSR1	2	Ensembl Compara 87-89|OrthoInspector
WBGene00002240	ksr-2	F58D5.4	ENSG00000171435	KSR2	2	Ensembl Compara 87-89|OrthoInspector
WBGene00002250	lap-2	W07G4.4	ENSG00000002549	LAP3	1	Ensembl Compara 87-89
WBGene00002271	lec-8	R07B1.10	ENSG00000131981	LGALS3	1	InParanoid
WBGene00002299	let-23	ZK1067.1	ENSG00000065361	ERBB3	4	Ensembl Compara 87-89|OMA|OrthoInspector|OrthoMCL
WBGene00002299	let-23	ZK1067.1	ENSG00000141736	ERBB2	4	Ensembl Compara 87-89|OMA|OrthoInspector|OrthoMCL
WBGene00002299	let-23	ZK1067.1	ENSG00000146648	EGFR	4	Ensembl Compara 87-89|OMA|OrthoInspector|OrthoMCL
WBGene00002299	let-23	ZK1067.1	ENSG00000178568	ERBB4	4	Ensembl Compara 87-89|OMA|OrthoInspector|OrthoMCL
WBGene00002694	let-502	C10H11.9	ENSG00000067900	ROCK1	5	Ensembl Compara 87-89|InParanoid|OMA|OrthoInspector|OrthoMCL
WBGene00002694	let-502	C10H11.9	ENSG00000134318	ROCK2	6	Ensembl Compara 87-89|Homologene|InParanoid|OMA|OrthoInspector|OrthoMCL
WBGene00002783	let-607	F57B10.1	ENSG00000060566	CREB3L3	2	Ensembl Compara 87-89|OrthoInspector
WBGene00002783	let-607	F57B10.1	ENSG00000107175	CREB3	1	Ensembl Compara 87-89
WBGene00002783	let-607	F57B10.1	ENSG00000143578	CREB3L4	2	Ensembl Compara 87-89|OrthoInspector
WBGene00002783	let-607	F57B10.1	ENSG00000157613	CREB3L1	1	OrthoInspector
WBGene00002980	lgg-1	C32D5.9	ENSG00000170296	GABARAP	4	Ensembl Compara 87-89|OMA|OrthoInspector|OrthoMCL
WBGene00002980	lgg-1	C32D5.9	ENSG00000139112	GABARAPL1	3	Homologene|InParanoid|OrthoInspector
WBGene00002980	lgg-1	C32D5.9	ENSG00000238244	None	2	InParanoid|OrthoMCL
WBGene00002980	lgg-1	C32D5.9	ENSG00000034713	GABARAPL2	1	OrthoMCL
WBGene00002981	lgg-2	ZK593.6	ENSG00000101460	MAP1LC3A	6	Ensembl Compara 87-89|Homologene|InParanoid|OMA|OrthoInspector|OrthoMCL
WBGene00002981	lgg-2	ZK593.6	ENSG00000140941	MAP1LC3B	4	Ensembl Compara 87-89|InParanoid|OMA|OrthoInspector
WBGene00002981	lgg-2	ZK593.6	ENSG00000258102	MAP1LC3B2	4	Ensembl Compara 87-89|InParanoid|OMA|OrthoInspector
WBGene00002981	lgg-2	ZK593.6	ENSG00000197769	MAP1LC3C	1	OrthoInspector
WBGene00003002	lin-13	C03B8.4	ENSG00000102935	None	0	Legacy Ortholist
WBGene00003002	lin-13	C03B8.4	ENSG00000142528	ZNF473	0	Legacy Ortholist
WBGene00003002	lin-13	C03B8.4	ENSG00000198795	None	0	Legacy Ortholist
WBGene00003055	lon-1	F48E8.1	ENSG00000096006	CRISP3	1	Ensembl Compara 87-89
WBGene00003055	lon-1	F48E8.1	ENSG00000101074	R3HDML	2	Ensembl Compara 87-89|OrthoInspector
WBGene00003055	lon-1	F48E8.1	ENSG00000103196	CRISPLD2	2	Ensembl Compara 87-89|OrthoInspector
WBGene00003055	lon-1	F48E8.1	ENSG00000121005	CRISPLD1	2	Ensembl Compara 87-89|OrthoInspector
WBGene00003055	lon-1	F48E8.1	ENSG00000124490	CRISP2	1	Ensembl Compara 87-89
WBGene00003055	lon-1	F48E8.1	ENSG00000124812	CRISP1	1	Ensembl Compara 87-89
WBGene00003055	lon-1	F48E8.1	ENSG00000137558	PI15	2	Ensembl Compara 87-89|OrthoInspector
WBGene00003055	lon-1	F48E8.1	ENSG00000139278	GLIPR1	2	Ensembl Compara 87-89|OrthoInspector
WBGene00003055	lon-1	F48E8.1	ENSG00000140839	CLEC18B	1	Ensembl Compara 87-89
WBGene00003055	lon-1	F48E8.1	ENSG00000157322	CLEC18A	1	Ensembl Compara 87-89
WBGene00003055	lon-1	F48E8.1	ENSG00000157335	CLEC18C	1	Ensembl Compara 87-89
WBGene00003055	lon-1	F48E8.1	ENSG00000164530	PI16	2	Ensembl Compara 87-89|OrthoInspector
WBGene00003055	lon-1	F48E8.1	ENSG00000173401	GLIPR1L1	2	Ensembl Compara 87-89|OrthoInspector
WBGene00003055	lon-1	F48E8.1	ENSG00000180481	GLIPR1L2	1	Ensembl Compara 87-89
WBGene00003071	lrp-1	F29D11.1	ENSG00000081479	LRP2	6	Ensembl Compara 87-89|Homologene|InParanoid|OMA|OrthoInspector|OrthoMCL
WBGene00003071	lrp-1	F29D11.1	ENSG00000123384	LRP1	2	OrthoInspector|OrthoMCL
WBGene00003071	lrp-1	F29D11.1	ENSG00000168702	LRP1B	1	OrthoMCL
WBGene00003071	lrp-1	F29D11.1	ENSG00000070018	LRP6	1	OrthoMCL
WBGene00003071	lrp-1	F29D11.1	ENSG00000134569	LRP4	1	OrthoMCL
WBGene00003071	lrp-1	F29D11.1	ENSG00000162337	LRP5	1	OrthoMCL
WBGene00003072	lrp-2	T21E3.3	ENSG00000081479	LRP2	1	OrthoMCL
WBGene00003072	lrp-2	T21E3.3	ENSG00000123384	LRP1	2	Ensembl Compara 87-89|OrthoMCL
WBGene00003072	lrp-2	T21E3.3	ENSG00000168702	LRP1B	2	Ensembl Compara 87-89|OrthoMCL
WBGene00003072	lrp-2	T21E3.3	ENSG00000070018	LRP6	1	OrthoMCL
WBGene00003072	lrp-2	T21E3.3	ENSG00000134569	LRP4	1	OrthoMCL
WBGene00003072	lrp-2	T21E3.3	ENSG00000162337	LRP5	1	OrthoMCL
WBGene00003185	mek-1	K08A8.1	ENSG00000076984	MAP2K7	6	Ensembl Compara 87-89|Homologene|InParanoid|OMA|OrthoInspector|OrthoMCL
WBGene00003196	mel-11	C06C3.1	ENSG00000058272	PPP1R12A	5	Ensembl Compara 87-89|InParanoid|OMA|OrthoInspector|OrthoMCL
WBGene00003196	mel-11	C06C3.1	ENSG00000077157	PPP1R12B	5	Ensembl Compara 87-89|InParanoid|OMA|OrthoInspector|OrthoMCL
WBGene00003196	mel-11	C06C3.1	ENSG00000125503	PPP1R12C	2	Ensembl Compara 87-89|OrthoInspector
WBGene00003243	mig-10	F10E9.6	ENSG00000077420	APBB1IP	2	Ensembl Compara 87-89|OrthoInspector
WBGene00003243	mig-10	F10E9.6	ENSG00000106070	GRB10	1	Ensembl Compara 87-89
WBGene00003243	mig-10	F10E9.6	ENSG00000115290	GRB14	1	Ensembl Compara 87-89
WBGene00003243	mig-10	F10E9.6	ENSG00000141738	GRB7	1	Ensembl Compara 87-89
WBGene00003243	mig-10	F10E9.6	ENSG00000173166	RAPH1	4	Ensembl Compara 87-89|InParanoid|OrthoInspector|OrthoMCL
WBGene00003247	mig-15	ZC504.4	ENSG00000071054	MAP4K4	4	Ensembl Compara 87-89|OMA|OrthoInspector|OrthoMCL
WBGene00003247	mig-15	ZC504.4	ENSG00000123572	NRK	3	Ensembl Compara 87-89|InParanoid|OrthoMCL
WBGene00003247	mig-15	ZC504.4	ENSG00000141503	MINK1	4	Ensembl Compara 87-89|OMA|OrthoInspector|OrthoMCL
WBGene00003247	mig-15	ZC504.4	ENSG00000154310	TNIK	4	Ensembl Compara 87-89|OMA|OrthoInspector|OrthoMCL
WBGene00003402	mpk-2	C04G6.1	ENSG00000166484	MAPK7	1	Ensembl Compara 87-89
WBGene00003408	mrp-2	F57C12.4	ENSG00000023839	ABCC2	4	Ensembl Compara 87-89|InParanoid|OrthoInspector|OrthoMCL
WBGene00003408	mrp-2	F57C12.4	ENSG00000091262	ABCC6	2	Ensembl Compara 87-89|OrthoMCL
WBGene00003408	mrp-2	F57C12.4	ENSG00000103222	ABCC1	5	Ensembl Compara 87-89|Homologene|InParanoid|OrthoInspector|OrthoMCL
WBGene00003408	mrp-2	F57C12.4	ENSG00000108846	ABCC3	4	Ensembl Compara 87-89|InParanoid|OrthoInspector|OrthoMCL
WBGene00003408	mrp-2	F57C12.4	ENSG00000114770	ABCC5	1	OrthoMCL
WBGene00003408	mrp-2	F57C12.4	ENSG00000121270	ABCC11	1	OrthoMCL
WBGene00003408	mrp-2	F57C12.4	ENSG00000140798	ABCC12	1	OrthoMCL
WBGene00003408	mrp-2	F57C12.4	ENSG00000125257	ABCC4	1	OrthoMCL
WBGene00003408	mrp-2	F57C12.4	ENSG00000278183	ABCC1	2	InParanoid|OrthoInspector
WBGene00003408	mrp-2	F57C12.4	ENSG00000006071	ABCC8	1	OrthoMCL
WBGene00003408	mrp-2	F57C12.4	ENSG00000069431	ABCC9	1	OrthoMCL
WBGene00003408	mrp-2	F57C12.4	ENSG00000124574	ABCC10	1	OrthoMCL
WBGene00003423	msi-1	R10E9.1	ENSG00000135097	MSI1	4	Ensembl Compara 87-89|InParanoid|OrthoInspector|OrthoMCL
WBGene00003423	msi-1	R10E9.1	ENSG00000153944	MSI2	4	Ensembl Compara 87-89|InParanoid|OrthoInspector|OrthoMCL
WBGene00003476	mtm-3	T24A11.1	ENSG00000100330	MTMR3	4	Ensembl Compara 87-89|InParanoid|OrthoInspector|OrthoMCL
WBGene00003476	mtm-3	T24A11.1	ENSG00000108389	MTMR4	3	Ensembl Compara 87-89|InParanoid|OrthoMCL
WBGene00003482	mua-3	K08E5.3	ENSG00000134376	CRB1	1	OrthoMCL
WBGene00003482	mua-3	K08E5.3	ENSG00000148204	CRB2	1	OrthoMCL
WBGene00003482	mua-3	K08E5.3	ENSG00000074181	NOTCH3	1	OrthoMCL
WBGene00003482	mua-3	K08E5.3	ENSG00000134250	NOTCH2	1	OrthoMCL
WBGene00003482	mua-3	K08E5.3	ENSG00000148400	NOTCH1	1	OrthoMCL
WBGene00003482	mua-3	K08E5.3	ENSG00000204301	NOTCH4	1	OrthoMCL
WBGene00003482	mua-3	K08E5.3	ENSG00000100473	COCH	1	Ensembl Compara 87-89
WBGene00003482	mua-3	K08E5.3	ENSG00000101203	COL20A1	1	Ensembl Compara 87-89
WBGene00003482	mua-3	K08E5.3	ENSG00000111799	COL12A1	1	Ensembl Compara 87-89
WBGene00003482	mua-3	K08E5.3	ENSG00000114270	COL7A1	1	Ensembl Compara 87-89
WBGene00003482	mua-3	K08E5.3	ENSG00000124159	MATN4	2	Ensembl Compara 87-89|OrthoInspector
WBGene00003482	mua-3	K08E5.3	ENSG00000132031	MATN3	2	Ensembl Compara 87-89|OrthoInspector
WBGene00003482	mua-3	K08E5.3	ENSG00000132561	MATN2	2	Ensembl Compara 87-89|OrthoInspector
WBGene00003482	mua-3	K08E5.3	ENSG00000162510	MATN1	2	Ensembl Compara 87-89|OrthoInspector
WBGene00003482	mua-3	K08E5.3	ENSG00000163359	COL6A3	1	Ensembl Compara 87-89
WBGene00003482	mua-3	K08E5.3	ENSG00000165816	VWA2	1	Ensembl Compara 87-89
WBGene00003482	mua-3	K08E5.3	ENSG00000172752	COL6A5	1	Ensembl Compara 87-89
WBGene00003482	mua-3	K08E5.3	ENSG00000187955	COL14A1	1	Ensembl Compara 87-89
WBGene00003482	mua-3	K08E5.3	ENSG00000205221	VIT	1	Ensembl Compara 87-89
WBGene00003482	mua-3	K08E5.3	ENSG00000206384	COL6A6	1	Ensembl Compara 87-89
WBGene00003482	mua-3	K08E5.3	ENSG00000188107	EYS	1	OrthoMCL
WBGene00003482	mua-3	K08E5.3	ENSG00000138829	FBN2	1	OrthoMCL
WBGene00003482	mua-3	K08E5.3	ENSG00000142449	FBN3	1	OrthoMCL
WBGene00003482	mua-3	K08E5.3	ENSG00000166147	FBN1	1	OrthoMCL
WBGene00003482	mua-3	K08E5.3	ENSG00000223355	NOTCH4	1	OrthoMCL
WBGene00003482	mua-3	K08E5.3	ENSG00000234876	NOTCH4	1	OrthoMCL
WBGene00003482	mua-3	K08E5.3	ENSG00000238196	NOTCH4	1	OrthoMCL
WBGene00003482	mua-3	K08E5.3	ENSG00000206312	NOTCH4	1	OrthoMCL
WBGene00003482	mua-3	K08E5.3	ENSG00000232339	NOTCH4	1	OrthoMCL
WBGene00003482	mua-3	K08E5.3	ENSG00000235396	NOTCH4	1	OrthoMCL
WBGene00003485	mua-6	W10G6.3	ENSG00000113368	LMNB1	3	Ensembl Compara 87-89|OrthoInspector|OrthoMCL
WBGene00003485	mua-6	W10G6.3	ENSG00000152936	LMNTD1	1	Ensembl Compara 87-89
WBGene00003485	mua-6	W10G6.3	ENSG00000160789	LMNA	3	Ensembl Compara 87-89|OrthoInspector|OrthoMCL
WBGene00003485	mua-6	W10G6.3	ENSG00000176619	LMNB2	5	Ensembl Compara 87-89|Homologene|InParanoid|OrthoInspector|OrthoMCL
WBGene00003497	mup-4	K07D8.1	ENSG00000134376	CRB1	1	OrthoMCL
WBGene00003497	mup-4	K07D8.1	ENSG00000148204	CRB2	1	OrthoMCL
WBGene00003497	mup-4	K07D8.1	ENSG00000074181	NOTCH3	1	OrthoMCL
WBGene00003497	mup-4	K07D8.1	ENSG00000134250	NOTCH2	1	OrthoMCL
WBGene00003497	mup-4	K07D8.1	ENSG00000148400	NOTCH1	1	OrthoMCL
WBGene00003497	mup-4	K07D8.1	ENSG00000204301	NOTCH4	1	OrthoMCL
WBGene00003497	mup-4	K07D8.1	ENSG00000100473	COCH	1	Ensembl Compara 87-89
WBGene00003497	mup-4	K07D8.1	ENSG00000101203	COL20A1	1	Ensembl Compara 87-89
WBGene00003497	mup-4	K07D8.1	ENSG00000111799	COL12A1	1	Ensembl Compara 87-89
WBGene00003497	mup-4	K07D8.1	ENSG00000114270	COL7A1	1	Ensembl Compara 87-89
WBGene00003497	mup-4	K07D8.1	ENSG00000124159	MATN4	2	Ensembl Compara 87-89|OrthoInspector
WBGene00003497	mup-4	K07D8.1	ENSG00000132031	MATN3	2	Ensembl Compara 87-89|OrthoInspector
WBGene00003497	mup-4	K07D8.1	ENSG00000132561	MATN2	2	Ensembl Compara 87-89|OrthoInspector
WBGene00003497	mup-4	K07D8.1	ENSG00000162510	MATN1	2	Ensembl Compara 87-89|OrthoInspector
WBGene00003497	mup-4	K07D8.1	ENSG00000163359	COL6A3	1	Ensembl Compara 87-89
WBGene00003497	mup-4	K07D8.1	ENSG00000165816	VWA2	1	Ensembl Compara 87-89
WBGene00003497	mup-4	K07D8.1	ENSG00000172752	COL6A5	1	Ensembl Compara 87-89
WBGene00003497	mup-4	K07D8.1	ENSG00000187955	COL14A1	1	Ensembl Compara 87-89
WBGene00003497	mup-4	K07D8.1	ENSG00000205221	VIT	1	Ensembl Compara 87-89
WBGene00003497	mup-4	K07D8.1	ENSG00000206384	COL6A6	1	Ensembl Compara 87-89
WBGene00003497	mup-4	K07D8.1	ENSG00000188107	EYS	1	OrthoMCL
WBGene00003497	mup-4	K07D8.1	ENSG00000138829	FBN2	1	OrthoMCL
WBGene00003497	mup-4	K07D8.1	ENSG00000142449	FBN3	1	OrthoMCL
WBGene00003497	mup-4	K07D8.1	ENSG00000166147	FBN1	1	OrthoMCL
WBGene00003497	mup-4	K07D8.1	ENSG00000223355	NOTCH4	1	OrthoMCL
WBGene00003497	mup-4	K07D8.1	ENSG00000234876	NOTCH4	1	OrthoMCL
WBGene00003497	mup-4	K07D8.1	ENSG00000238196	NOTCH4	1	OrthoMCL
WBGene00003497	mup-4	K07D8.1	ENSG00000206312	NOTCH4	1	OrthoMCL
WBGene00003497	mup-4	K07D8.1	ENSG00000232339	NOTCH4	1	OrthoMCL
WBGene00003497	mup-4	K07D8.1	ENSG00000235396	NOTCH4	1	OrthoMCL
WBGene00003561	ncr-1	F02E8.6	ENSG00000015520	NPC1L1	5	Ensembl Compara 87-89|InParanoid|OMA|OrthoInspector|OrthoMCL
WBGene00003561	ncr-1	F02E8.6	ENSG00000141458	NPC1	5	Ensembl Compara 87-89|InParanoid|OMA|OrthoInspector|OrthoMCL
WBGene00003588	nex-1	ZC155.1	ENSG00000104537	ANXA13	2	Ensembl Compara 87-89|Homologene
WBGene00003588	nex-1	ZC155.1	ENSG00000109511	ANXA10	1	Ensembl Compara 87-89
WBGene00003588	nex-1	ZC155.1	ENSG00000122359	ANXA11	1	Ensembl Compara 87-89
WBGene00003588	nex-1	ZC155.1	ENSG00000135046	ANXA1	1	Ensembl Compara 87-89
WBGene00003588	nex-1	ZC155.1	ENSG00000138279	ANXA7	1	Ensembl Compara 87-89
WBGene00003588	nex-1	ZC155.1	ENSG00000138772	ANXA3	1	Ensembl Compara 87-89
WBGene00003588	nex-1	ZC155.1	ENSG00000143412	ANXA9	1	Ensembl Compara 87-89
WBGene00003588	nex-1	ZC155.1	ENSG00000164111	ANXA5	1	Ensembl Compara 87-89
WBGene00003588	nex-1	ZC155.1	ENSG00000182718	ANXA2	1	Ensembl Compara 87-89
WBGene00003588	nex-1	ZC155.1	ENSG00000196975	ANXA4	1	Ensembl Compara 87-89
WBGene00003588	nex-1	ZC155.1	ENSG00000197043	ANXA6	1	Ensembl Compara 87-89
WBGene00003588	nex-1	ZC155.1	ENSG00000264230	ANXA8L1	1	Ensembl Compara 87-89
WBGene00003588	nex-1	ZC155.1	ENSG00000265190	ANXA8	1	Ensembl Compara 87-89
WBGene00003593	nfm-1	F42A10.2	ENSG00000186575	NF2	1	Ensembl Compara 87-89
WBGene00003731	nhx-3	C54F6.13	ENSG00000066230	SLC9A3	4	Ensembl Compara 87-89|InParanoid|OrthoInspector|OrthoMCL
WBGene00003731	nhx-3	C54F6.13	ENSG00000090020	SLC9A1	4	Ensembl Compara 87-89|OMA|OrthoInspector|OrthoMCL
WBGene00003731	nhx-3	C54F6.13	ENSG00000115616	SLC9A2	4	Ensembl Compara 87-89|InParanoid|OrthoInspector|OrthoMCL
WBGene00003731	nhx-3	C54F6.13	ENSG00000135740	SLC9A5	4	Ensembl Compara 87-89|InParanoid|OrthoInspector|OrthoMCL
WBGene00003731	nhx-3	C54F6.13	ENSG00000180251	SLC9A4	2	Ensembl Compara 87-89|OrthoMCL
WBGene00003733	nhx-5	F57C7.2	ENSG00000065923	SLC9A7	5	Ensembl Compara 87-89|InParanoid|OMA|OrthoInspector|OrthoMCL
WBGene00003733	nhx-5	F57C7.2	ENSG00000181804	SLC9A9	5	Ensembl Compara 87-89|InParanoid|OMA|OrthoInspector|OrthoMCL
WBGene00003733	nhx-5	F57C7.2	ENSG00000198689	SLC9A6	6	Ensembl Compara 87-89|Homologene|InParanoid|OMA|OrthoInspector|OrthoMCL
WBGene00003733	nhx-5	F57C7.2	ENSG00000197818	SLC9A8	1	OrthoMCL
WBGene00003930	pat-3	ZK1058.2	ENSG00000139626	ITGB7	4	Ensembl Compara 87-89|InParanoid|OrthoInspector|OrthoMCL
WBGene00003930	pat-3	ZK1058.2	ENSG00000150093	ITGB1	5	Ensembl Compara 87-89|Homologene|InParanoid|OrthoInspector|OrthoMCL
WBGene00003930	pat-3	ZK1058.2	ENSG00000160255	ITGB2	3	Ensembl Compara 87-89|InParanoid|OrthoMCL
WBGene00003930	pat-3	ZK1058.2	ENSG00000198542	ITGBL1	1	Ensembl Compara 87-89
WBGene00003930	pat-3	ZK1058.2	ENSG00000259207	ITGB3	2	InParanoid|OrthoInspector
WBGene00003930	pat-3	ZK1058.2	ENSG00000082781	ITGB5	2	OrthoInspector|OrthoMCL
WBGene00003930	pat-3	ZK1058.2	ENSG00000115221	ITGB6	2	OrthoInspector|OrthoMCL
WBGene00003943	pbo-4	K09C8.1	ENSG00000066230	SLC9A3	1	Ensembl Compara 87-89
WBGene00003943	pbo-4	K09C8.1	ENSG00000090020	SLC9A1	1	Ensembl Compara 87-89
WBGene00003943	pbo-4	K09C8.1	ENSG00000115616	SLC9A2	1	Ensembl Compara 87-89
WBGene00003943	pbo-4	K09C8.1	ENSG00000135740	SLC9A5	1	Ensembl Compara 87-89
WBGene00003943	pbo-4	K09C8.1	ENSG00000180251	SLC9A4	1	Ensembl Compara 87-89
WBGene00003943	pbo-4	K09C8.1	ENSG00000065923	SLC9A7	1	OrthoMCL
WBGene00003943	pbo-4	K09C8.1	ENSG00000181804	SLC9A9	1	OrthoMCL
WBGene00003943	pbo-4	K09C8.1	ENSG00000198689	SLC9A6	1	OrthoMCL
WBGene00003943	pbo-4	K09C8.1	ENSG00000197818	SLC9A8	1	OrthoMCL
WBGene00003989	pfn-1	Y18D10A.20	ENSG00000176732	PFN4	1	OrthoMCL
WBGene00004025	phy-2	F35G2.4	ENSG00000072682	P4HA2	5	Ensembl Compara 87-89|InParanoid|OMA|OrthoInspector|OrthoMCL
WBGene00004025	phy-2	F35G2.4	ENSG00000122884	P4HA1	6	Ensembl Compara 87-89|Homologene|InParanoid|OMA|OrthoInspector|OrthoMCL
WBGene00004083	pph-1	C05A2.1	ENSG00000104695	PPP2CB	1	OrthoMCL
WBGene00004083	pph-1	C05A2.1	ENSG00000113575	PPP2CA	1	OrthoMCL
WBGene00004208	ptc-1	ZK675.1	ENSG00000117425	PTCH2	4	Ensembl Compara 87-89|InParanoid|OrthoInspector|OrthoMCL
WBGene00004208	ptc-1	ZK675.1	ENSG00000185920	PTCH1	6	Ensembl Compara 87-89|Homologene|InParanoid|OMA|OrthoInspector|OrthoMCL
WBGene00004264	qua-1	T05C12.10	ENSG00000143631	FLG	1	OrthoMCL
WBGene00004264	qua-1	T05C12.10	ENSG00000143520	FLG2	1	OrthoMCL
WBGene00004264	qua-1	T05C12.10	ENSG00000197915	HRNR	1	OrthoMCL
WBGene00004300	ram-2	F38A3.2	ENSG00000019169	MARCO	1	InParanoid
WBGene00004397	rol-6	T01B7.7	ENSG00000206561	COLQ	1	InParanoid
WBGene00004408	rla-0	F25H2.10	ENSG00000089157	RPLP0	6	Ensembl Compara 87-89|Homologene|InParanoid|OMA|OrthoInspector|OrthoMCL
WBGene00004409	rla-1	Y37E3.7	ENSG00000137818	RPLP1	5	Ensembl Compara 87-89|InParanoid|OMA|OrthoInspector|OrthoMCL
WBGene00004470	rps-1	F56F3.5	ENSG00000145425	RPS3A	6	Ensembl Compara 87-89|Homologene|InParanoid|OMA|OrthoInspector|OrthoMCL
WBGene00004470	rps-1	F56F3.5	ENSG00000234797	None	1	OrthoMCL
WBGene00004477	rps-8	F42C5.8	ENSG00000142937	RPS8	6	Ensembl Compara 87-89|Homologene|InParanoid|OMA|OrthoInspector|OrthoMCL
WBGene00004749	sdn-1	F57C7.3	ENSG00000115884	SDC1	2	Ensembl Compara 87-89|InParanoid
WBGene00004749	sdn-1	F57C7.3	ENSG00000124145	SDC4	2	Ensembl Compara 87-89|InParanoid
WBGene00004749	sdn-1	F57C7.3	ENSG00000162512	SDC3	1	Ensembl Compara 87-89
WBGene00004749	sdn-1	F57C7.3	ENSG00000169439	SDC2	3	Ensembl Compara 87-89|InParanoid|OrthoMCL
WBGene00004798	sip-1	F43D9.4	ENSG00000004776	HSPB6	1	Ensembl Compara 87-89
WBGene00004798	sip-1	F43D9.4	ENSG00000106211	HSPB1	1	Ensembl Compara 87-89
WBGene00004798	sip-1	F43D9.4	ENSG00000109846	CRYAB	1	Ensembl Compara 87-89
WBGene00004798	sip-1	F43D9.4	ENSG00000152137	HSPB8	1	Ensembl Compara 87-89
WBGene00004798	sip-1	F43D9.4	ENSG00000160202	CRYAA	2	Ensembl Compara 87-89|OMA
WBGene00004798	sip-1	F43D9.4	ENSG00000169271	HSPB3	1	Ensembl Compara 87-89
WBGene00004798	sip-1	F43D9.4	ENSG00000170276	HSPB2	1	Ensembl Compara 87-89
WBGene00004798	sip-1	F43D9.4	ENSG00000254445	HSPB2-C11orf52	1	Ensembl Compara 87-89
WBGene00004798	sip-1	F43D9.4	ENSG00000276076	None	2	Ensembl Compara 87-89|OMA
WBGene00004827	skr-21	K08H2.1	ENSG00000113558	SKP1	1	Ensembl Compara 87-89
WBGene00004827	skr-21	K08H2.1	ENSG00000272772	None	1	Ensembl Compara 87-89
WBGene00004829	sli-1	M02A10.3	ENSG00000110395	CBL	3	Ensembl Compara 87-89|OrthoInspector|OrthoMCL
WBGene00004829	sli-1	M02A10.3	ENSG00000114423	CBLB	3	Ensembl Compara 87-89|OrthoInspector|OrthoMCL
WBGene00004829	sli-1	M02A10.3	ENSG00000142273	CBLC	3	Ensembl Compara 87-89|InParanoid|OMA
WBGene00004855	sma-1	R31.1	ENSG00000137877	SPTBN5	5	Ensembl Compara 87-89|Homologene|InParanoid|OrthoInspector|OrthoMCL
WBGene00004855	sma-1	R31.1	ENSG00000197694	SPTAN1	1	OrthoMCL
WBGene00004855	sma-1	R31.1	ENSG00000070182	SPTB	1	OrthoMCL
WBGene00004855	sma-1	R31.1	ENSG00000115306	SPTBN1	1	OrthoMCL
WBGene00004855	sma-1	R31.1	ENSG00000160460	SPTBN4	1	OrthoMCL
WBGene00004855	sma-1	R31.1	ENSG00000173898	SPTBN2	1	OrthoMCL
WBGene00004855	sma-1	R31.1	ENSG00000163554	SPTA1	1	OrthoMCL
WBGene00004892	sms-1	H21P03.3	ENSG00000164023	SGMS2	2	Ensembl Compara 87-89|OMA
WBGene00004892	sms-1	H21P03.3	ENSG00000198964	SGMS1	3	Ensembl Compara 87-89|Homologene|OrthoMCL
WBGene00004897	snb-1	T10H9.4	ENSG00000049245	VAMP3	3	Ensembl Compara 87-89|OrthoInspector|OrthoMCL
WBGene00004897	snb-1	T10H9.4	ENSG00000139190	VAMP1	5	Ensembl Compara 87-89|Homologene|InParanoid|OrthoInspector|OrthoMCL
WBGene00004897	snb-1	T10H9.4	ENSG00000220205	VAMP2	4	Ensembl Compara 87-89|InParanoid|OrthoInspector|OrthoMCL
WBGene00004897	snb-1	T10H9.4	ENSG00000263620	None	4	Ensembl Compara 87-89|InParanoid|OMA|OrthoInspector
WBGene00004897	snb-1	T10H9.4	ENSG00000118640	VAMP8	1	OrthoMCL
WBGene00004897	snb-1	T10H9.4	ENSG00000117533	VAMP4	1	OrthoMCL
WBGene00005016	sqt-1	B0491.2	ENSG00000206561	COLQ	1	InParanoid
WBGene00005648	srp-7	F20D6.4	ENSG00000099937	SERPIND1	1	Ensembl Compara 87-89
WBGene00005648	srp-7	F20D6.4	ENSG00000100665	SERPINA4	1	Ensembl Compara 87-89
WBGene00005648	srp-7	F20D6.4	ENSG00000106366	SERPINE1	1	Ensembl Compara 87-89
WBGene00005648	srp-7	F20D6.4	ENSG00000114204	SERPINI2	2	Ensembl Compara 87-89|OrthoInspector
WBGene00005648	srp-7	F20D6.4	ENSG00000123561	SERPINA7	1	Ensembl Compara 87-89
WBGene00005648	srp-7	F20D6.4	ENSG00000135919	SERPINE2	1	Ensembl Compara 87-89
WBGene00005648	srp-7	F20D6.4	ENSG00000140093	SERPINA10	1	Ensembl Compara 87-89
WBGene00005648	srp-7	F20D6.4	ENSG00000149257	SERPINH1	1	Ensembl Compara 87-89
WBGene00005648	srp-7	F20D6.4	ENSG00000163536	SERPINI1	3	Ensembl Compara 87-89|OrthoInspector|OrthoMCL
WBGene00005648	srp-7	F20D6.4	ENSG00000165953	SERPINA12	1	Ensembl Compara 87-89
WBGene00005648	srp-7	F20D6.4	ENSG00000170054	SERPINA9	1	Ensembl Compara 87-89
WBGene00005648	srp-7	F20D6.4	ENSG00000170099	SERPINA6	1	Ensembl Compara 87-89
WBGene00005648	srp-7	F20D6.4	ENSG00000186910	SERPINA11	1	Ensembl Compara 87-89
WBGene00005648	srp-7	F20D6.4	ENSG00000188488	SERPINA5	2	Ensembl Compara 87-89|OrthoInspector
WBGene00005648	srp-7	F20D6.4	ENSG00000196136	SERPINA3	1	Ensembl Compara 87-89
WBGene00005648	srp-7	F20D6.4	ENSG00000197249	SERPINA1	1	Ensembl Compara 87-89
WBGene00005648	srp-7	F20D6.4	ENSG00000253309	SERPINE3	1	Ensembl Compara 87-89
WBGene00005648	srp-7	F20D6.4	ENSG00000258597	SERPINA2	1	Ensembl Compara 87-89
WBGene00005648	srp-7	F20D6.4	ENSG00000273259	None	1	Ensembl Compara 87-89
WBGene00005648	srp-7	F20D6.4	ENSG00000206073	SERPINB4	3	Homologene|InParanoid|OrthoMCL
WBGene00005648	srp-7	F20D6.4	ENSG00000021355	SERPINB1	2	InParanoid|OrthoMCL
WBGene00005648	srp-7	F20D6.4	ENSG00000057149	SERPINB3	3	InParanoid|OrthoInspector|OrthoMCL
WBGene00005648	srp-7	F20D6.4	ENSG00000117601	SERPINC1	2	InParanoid|OrthoInspector
WBGene00005648	srp-7	F20D6.4	ENSG00000124570	SERPINB6	3	InParanoid|OrthoInspector|OrthoMCL
WBGene00005648	srp-7	F20D6.4	ENSG00000166396	SERPINB7	1	InParanoid
WBGene00005648	srp-7	F20D6.4	ENSG00000166401	SERPINB8	2	InParanoid|OrthoInspector
WBGene00005648	srp-7	F20D6.4	ENSG00000166634	SERPINB12	1	InParanoid
WBGene00005648	srp-7	F20D6.4	ENSG00000170542	SERPINB9	2	InParanoid|OrthoInspector
WBGene00005648	srp-7	F20D6.4	ENSG00000197632	SERPINB2	1	InParanoid
WBGene00005648	srp-7	F20D6.4	ENSG00000197641	SERPINB13	1	InParanoid
WBGene00005648	srp-7	F20D6.4	ENSG00000206072	SERPINB11	2	InParanoid|OrthoInspector
WBGene00005648	srp-7	F20D6.4	ENSG00000206075	SERPINB5	1	InParanoid
WBGene00005648	srp-7	F20D6.4	ENSG00000242550	SERPINB10	1	InParanoid
WBGene00005663	sars-1	C47E12.1	ENSG00000104835	SARS2	1	OrthoMCL
WBGene00005663	sars-1	C47E12.1	ENSG00000031698	SARS	5	Ensembl Compara 87-89|Homologene|InParanoid|OrthoInspector|OrthoMCL
WBGene00006324	sup-17	DY3.7	ENSG00000137845	ADAM10	5	Ensembl Compara 87-89|InParanoid|OMA|OrthoInspector|OrthoMCL
WBGene00006331	sup-26	R10E4.2	ENSG00000184388	PABPC1L2B	1	Ensembl Compara 87-89
WBGene00006331	sup-26	R10E4.2	ENSG00000186288	PABPC1L2A	1	Ensembl Compara 87-89
WBGene00006331	sup-26	R10E4.2	ENSG00000076067	RBMS2	2	Ensembl Compara 87-89|OrthoInspector
WBGene00006331	sup-26	R10E4.2	ENSG00000144642	RBMS3	2	Ensembl Compara 87-89|OrthoInspector
WBGene00006331	sup-26	R10E4.2	ENSG00000153250	RBMS1	2	Ensembl Compara 87-89|OrthoInspector
WBGene00006372	syx-2	F48F7.2	ENSG00000135604	STX11	1	Ensembl Compara 87-89
WBGene00006372	syx-2	F48F7.2	ENSG00000178750	STX19	1	Ensembl Compara 87-89
WBGene00006528	tba-1	F26E4.8	ENSG00000123416	TUBA1B	1	OrthoMCL
WBGene00006528	tba-1	F26E4.8	ENSG00000127824	TUBA4A	1	OrthoMCL
WBGene00006528	tba-1	F26E4.8	ENSG00000167552	TUBA1A	1	OrthoMCL
WBGene00006528	tba-1	F26E4.8	ENSG00000167553	TUBA1C	2	Homologene|OrthoMCL
WBGene00006528	tba-1	F26E4.8	ENSG00000178462	TUBAL3	1	OrthoMCL
WBGene00006528	tba-1	F26E4.8	ENSG00000075886	TUBA3D	1	OrthoMCL
WBGene00006528	tba-1	F26E4.8	ENSG00000152086	TUBA3E	1	OrthoMCL
WBGene00006528	tba-1	F26E4.8	ENSG00000198033	TUBA3C	1	OrthoMCL
WBGene00006528	tba-1	F26E4.8	ENSG00000183785	TUBA8	2	OMA|OrthoMCL
WBGene00006528	tba-1	F26E4.8	ENSG00000214391	None	1	OrthoMCL
WBGene00006539	tbb-6	T04H1.9	ENSG00000074935	TUBE1	1	Ensembl Compara 87-89
WBGene00006575	tir-1	F13B10.1	ENSG00000004139	SARM1	6	Ensembl Compara 87-89|Homologene|InParanoid|OMA|OrthoInspector|OrthoMCL
WBGene00006578	tli-1	F25H2.1	ENSG00000078902	TOLLIP	6	Ensembl Compara 87-89|Homologene|InParanoid|OMA|OrthoInspector|OrthoMCL
WBGene00006649	tth-1	F08F1.8	ENSG00000205542	TMSB4X	1	OrthoMCL
WBGene00006727	ubq-1	F25B5.4	ENSG00000150991	UBC	4	Ensembl Compara 87-89|InParanoid|OrthoInspector|OrthoMCL
WBGene00006727	ubq-1	F25B5.4	ENSG00000170315	UBB	2	Ensembl Compara 87-89|OrthoMCL
WBGene00006727	ubq-1	F25B5.4	ENSG00000187608	ISG15	1	Ensembl Compara 87-89
WBGene00006727	ubq-1	F25B5.4	ENSG00000213886	UBD	1	Ensembl Compara 87-89
WBGene00006840	unc-116	R05D3.7	ENSG00000155980	KIF5A	5	Ensembl Compara 87-89|InParanoid|OMA|OrthoInspector|OrthoMCL
WBGene00006840	unc-116	R05D3.7	ENSG00000168280	KIF5C	5	Ensembl Compara 87-89|InParanoid|OMA|OrthoInspector|OrthoMCL
WBGene00006840	unc-116	R05D3.7	ENSG00000170759	KIF5B	6	Ensembl Compara 87-89|Homologene|InParanoid|OMA|OrthoInspector|OrthoMCL
WBGene00007010	alx-1	R10E12.1	ENSG00000170248	PDCD6IP	6	Ensembl Compara 87-89|Homologene|InParanoid|OMA|OrthoInspector|OrthoMCL
WBGene00007114	mttu-1	B0035.16	ENSG00000100416	TRMU	6	Ensembl Compara 87-89|Homologene|InParanoid|OMA|OrthoInspector|OrthoMCL
WBGene00007414	None	C07E3.3	ENSG00000204842	ATXN2	1	OMA
WBGene00007505	pezo-1	C10C5.1	ENSG00000103335	PIEZO1	5	Ensembl Compara 87-89|InParanoid|OMA|OrthoInspector|OrthoMCL
WBGene00007505	pezo-1	C10C5.1	ENSG00000154864	PIEZO2	5	Ensembl Compara 87-89|Homologene|InParanoid|OrthoInspector|OrthoMCL
WBGene00007666	None	C18B12.4	ENSG00000082996	RNF13	4	Ensembl Compara 87-89|InParanoid|OrthoInspector|OrthoMCL
WBGene00007666	None	C18B12.4	ENSG00000105428	ZNRF4	3	Ensembl Compara 87-89|InParanoid|OrthoInspector
WBGene00007666	None	C18B12.4	ENSG00000108523	RNF167	5	Ensembl Compara 87-89|Homologene|InParanoid|OrthoInspector|OrthoMCL
WBGene00007772	egrh-1	C27C12.2	ENSG00000120738	EGR1	3	Ensembl Compara 87-89|InParanoid|OrthoInspector
WBGene00007772	egrh-1	C27C12.2	ENSG00000122877	EGR2	2	Ensembl Compara 87-89|InParanoid
WBGene00007772	egrh-1	C27C12.2	ENSG00000135625	EGR4	1	Ensembl Compara 87-89
WBGene00007772	egrh-1	C27C12.2	ENSG00000179388	EGR3	3	Ensembl Compara 87-89|InParanoid|OrthoInspector
WBGene00007772	egrh-1	C27C12.2	ENSG00000184937	WT1	1	Ensembl Compara 87-89
WBGene00008183	rin-1	C48G7.3	ENSG00000100599	RIN3	3	Ensembl Compara 87-89|InParanoid|OrthoInspector
WBGene00008183	rin-1	C48G7.3	ENSG00000132669	RIN2	4	Ensembl Compara 87-89|InParanoid|OrthoInspector|OrthoMCL
WBGene00008183	rin-1	C48G7.3	ENSG00000174791	RIN1	2	Ensembl Compara 87-89|OrthoInspector
WBGene00008183	rin-1	C48G7.3	ENSG00000187994	RINL	1	Ensembl Compara 87-89
WBGene00008252	None	C51E3.6	ENSG00000213901	SLC23A3	1	Ensembl Compara 87-89
WBGene00008252	None	C51E3.6	ENSG00000089057	SLC23A2	3	InParanoid|OrthoInspector|OrthoMCL
WBGene00008252	None	C51E3.6	ENSG00000170482	SLC23A1	3	InParanoid|OrthoInspector|OrthoMCL
WBGene00008601	None	F09A5.4	ENSG00000182208	MOB2	2	Ensembl Compara 87-89|OrthoMCL
WBGene00008748	yap-1	F13E6.4	ENSG00000018408	WWTR1	1	InParanoid
WBGene00008748	yap-1	F13E6.4	ENSG00000137693	YAP1	1	InParanoid
WBGene00008891	clec-42	F16H6.1	ENSG00000123610	TNFAIP6	0	Legacy Ortholist
WBGene00009032	bgnt-1.3	F21H7.10	ENSG00000174684	B4GAT1	3	InParanoid|OMA|OrthoMCL
WBGene00009050	None	F22D6.2	ENSG00000086666	ZFAND6	4	Ensembl Compara 87-89|InParanoid|OrthoInspector|OrthoMCL
WBGene00009050	None	F22D6.2	ENSG00000107372	ZFAND5	5	Ensembl Compara 87-89|Homologene|InParanoid|OrthoInspector|OrthoMCL
WBGene00009164	hrdl-1	F26E4.11	ENSG00000159461	AMFR	6	Ensembl Compara 87-89|Homologene|InParanoid|OMA|OrthoInspector|OrthoMCL
WBGene00009369	None	F33H2.6	ENSG00000176623	RMDN1	6	Ensembl Compara 87-89|Homologene|InParanoid|OMA|OrthoInspector|OrthoMCL
WBGene00009435	None	F35G2.1	ENSG00000116260	QSOX1	4	Ensembl Compara 87-89|Homologene|OMA|OrthoMCL
WBGene00009435	None	F35G2.1	ENSG00000165661	QSOX2	3	Ensembl Compara 87-89|OMA|OrthoMCL
WBGene00009500	None	F36H2.3	ENSG00000117322	CR2	2	InParanoid|OMA
WBGene00009500	None	F36H2.3	ENSG00000000971	CFH	1	Homologene
WBGene00009574	None	F40E10.6	ENSG00000164855	TMEM184A	4	Ensembl Compara 87-89|InParanoid|OrthoInspector|OrthoMCL
WBGene00009574	None	F40E10.6	ENSG00000198792	TMEM184B	6	Ensembl Compara 87-89|Homologene|InParanoid|OMA|OrthoInspector|OrthoMCL
WBGene00009574	None	F40E10.6	ENSG00000164168	TMEM184C	1	OrthoMCL
WBGene00010047	None	F54D1.6	ENSG00000099994	SUSD2	1	Ensembl Compara 87-89
WBGene00010047	None	F54D1.6	ENSG00000145113	MUC4	1	Ensembl Compara 87-89
WBGene00010556	rack-1	K04D7.1	ENSG00000204628	RACK1	6	Ensembl Compara 87-89|Homologene|InParanoid|OMA|OrthoInspector|OrthoMCL
WBGene00010641	crml-1	K07G5.1	ENSG00000079691	CARMIL1	4	Ensembl Compara 87-89|InParanoid|OrthoInspector|OrthoMCL
WBGene00010641	crml-1	K07G5.1	ENSG00000159753	CARMIL2	4	Ensembl Compara 87-89|InParanoid|OrthoInspector|OrthoMCL
WBGene00010641	crml-1	K07G5.1	ENSG00000186648	CARMIL3	4	Ensembl Compara 87-89|InParanoid|OrthoInspector|OrthoMCL
WBGene00010700	nipi-3	K09A9.1	ENSG00000071575	TRIB2	1	Ensembl Compara 87-89
WBGene00010700	nipi-3	K09A9.1	ENSG00000101255	TRIB3	1	Ensembl Compara 87-89
WBGene00010700	nipi-3	K09A9.1	ENSG00000173334	TRIB1	1	Ensembl Compara 87-89
WBGene00010700	nipi-3	K09A9.1	ENSG00000196182	STK40	1	Ensembl Compara 87-89
WBGene00010701	ent-2	K09A9.3	ENSG00000198246	SLC29A3	4	Ensembl Compara 87-89|InParanoid|OrthoInspector|OrthoMCL
WBGene00010701	ent-2	K09A9.3	ENSG00000112759	SLC29A1	3	InParanoid|OrthoInspector|OrthoMCL
WBGene00010701	ent-2	K09A9.3	ENSG00000174669	SLC29A2	3	InParanoid|OrthoInspector|OrthoMCL
WBGene00010731	None	K10C3.4	ENSG00000006042	TMEM98	2	Ensembl Compara 87-89|OrthoMCL
WBGene00010828	None	M02B1.3	ENSG00000160606	TLCD1	0	Legacy Ortholist
WBGene00010828	None	M02B1.3	ENSG00000185561	TLCD2	0	Legacy Ortholist
WBGene00011304	mnk-1	R166.5	ENSG00000079277	MKNK1	4	Ensembl Compara 87-89|InParanoid|OrthoInspector|OrthoMCL
WBGene00011304	mnk-1	R166.5	ENSG00000099875	MKNK2	5	Ensembl Compara 87-89|Homologene|InParanoid|OrthoInspector|OrthoMCL
WBGene00011449	None	T04H1.2	ENSG00000100226	GTPBP1	1	OrthoMCL
WBGene00011449	None	T04H1.2	ENSG00000172432	GTPBP2	6	Ensembl Compara 87-89|Homologene|InParanoid|OMA|OrthoInspector|OrthoMCL
WBGene00011833	None	T19B10.5	ENSG00000185567	AHNAK2	1	OrthoInspector
WBGene00011966	None	T23G7.3	ENSG00000254093	PINX1	4	Ensembl Compara 87-89|InParanoid|OMA|OrthoInspector
WBGene00012097	abcf-2	T27E9.7	ENSG00000033050	ABCF2	6	Ensembl Compara 87-89|Homologene|InParanoid|OMA|OrthoInspector|OrthoMCL
WBGene00012664	None	Y39B6A.1	ENSG00000197915	HRNR	0	Legacy Ortholist
WBGene00012688	None	Y39B6A.29	ENSG00000092931	MFSD11	1	Ensembl Compara 87-89
WBGene00012757	None	Y41C4A.11	ENSG00000184432	COPB2	0	Legacy Ortholist
WBGene00012782	None	Y43C5A.2	ENSG00000187151	ANGPTL5	1	InParanoid
WBGene00012782	None	Y43C5A.2	ENSG00000091879	ANGPT2	1	InParanoid
WBGene00012782	None	Y43C5A.2	ENSG00000101280	ANGPT4	1	InParanoid
WBGene00012782	None	Y43C5A.2	ENSG00000116194	ANGPTL1	1	InParanoid
WBGene00012782	None	Y43C5A.2	ENSG00000127951	FGL2	1	InParanoid
WBGene00012782	None	Y43C5A.2	ENSG00000136859	ANGPTL2	1	InParanoid
WBGene00012782	None	Y43C5A.2	ENSG00000154188	ANGPT1	1	InParanoid
WBGene00012782	None	Y43C5A.2	ENSG00000171557	FGG	1	InParanoid
WBGene00012782	None	Y43C5A.2	ENSG00000171564	FGB	1	InParanoid
WBGene00012782	None	Y43C5A.2	ENSG00000171819	ANGPTL7	1	InParanoid
WBGene00013034	tat-1	Y49E10.11	ENSG00000124406	ATP8A1	5	Ensembl Compara 87-89|Homologene|InParanoid|OrthoInspector|OrthoMCL
WBGene00013034	tat-1	Y49E10.11	ENSG00000132932	ATP8A2	5	Ensembl Compara 87-89|InParanoid|OMA|OrthoInspector|OrthoMCL
WBGene00013034	tat-1	Y49E10.11	ENSG00000081923	ATP8B1	1	OrthoMCL
WBGene00013034	tat-1	Y49E10.11	ENSG00000104043	ATP8B4	1	OrthoMCL
WBGene00013034	tat-1	Y49E10.11	ENSG00000143515	ATP8B2	1	OrthoMCL
WBGene00013034	tat-1	Y49E10.11	ENSG00000058063	ATP11B	1	OrthoMCL
WBGene00013034	tat-1	Y49E10.11	ENSG00000068650	ATP11A	1	OrthoMCL
WBGene00013034	tat-1	Y49E10.11	ENSG00000101974	ATP11C	1	OrthoMCL
WBGene00013034	tat-1	Y49E10.11	ENSG00000130270	ATP8B3	1	OrthoMCL
WBGene00013073	hmit-1.1	Y51A2D.4	ENSG00000151229	SLC2A13	5	Ensembl Compara 87-89|Homologene|InParanoid|OrthoInspector|OrthoMCL
WBGene00013073	hmit-1.1	Y51A2D.4	ENSG00000136856	SLC2A8	1	OrthoMCL
WBGene00014013	None	ZK632.4	ENSG00000178802	MPI	6	Ensembl Compara 87-89|Homologene|InParanoid|OMA|OrthoInspector|OrthoMCL
WBGene00014171	nep-26	ZK970.1	ENSG00000171551	ECEL1	1	Ensembl Compara 87-89
WBGene00015159	psd-1	B0361.5	ENSG00000241878	PISD	6	Ensembl Compara 87-89|Homologene|InParanoid|OMA|OrthoInspector|OrthoMCL
WBGene00015251	None	B0546.4	ENSG00000090238	YPEL3	1	OrthoMCL
WBGene00015251	None	B0546.4	ENSG00000100027	YPEL1	1	OrthoMCL
WBGene00015251	None	B0546.4	ENSG00000166793	YPEL4	1	OrthoMCL
WBGene00015251	None	B0546.4	ENSG00000175155	YPEL2	1	OrthoMCL
WBGene00015251	None	B0546.4	ENSG00000119801	YPEL5	2	OMA|OrthoMCL
WBGene00015278	None	C01B10.3	ENSG00000068383	INPP5A	1	Ensembl Compara 87-89
WBGene00015350	fbxl-1	C02F5.7	ENSG00000108306	FBXL20	6	Ensembl Compara 87-89|Homologene|InParanoid|OMA|OrthoInspector|OrthoMCL
WBGene00015350	fbxl-1	C02F5.7	ENSG00000153558	FBXL2	5	Ensembl Compara 87-89|InParanoid|OMA|OrthoInspector|OrthoMCL
WBGene00015510	None	C06A6.5	ENSG00000023318	ERP44	1	Ensembl Compara 87-89
WBGene00015561	None	C07A12.7	ENSG00000100284	TOM1	5	Ensembl Compara 87-89|InParanoid|OMA|OrthoInspector|OrthoMCL
WBGene00015561	None	C07A12.7	ENSG00000141198	TOM1L1	1	Ensembl Compara 87-89
WBGene00015561	None	C07A12.7	ENSG00000175662	TOM1L2	6	Ensembl Compara 87-89|Homologene|InParanoid|OMA|OrthoInspector|OrthoMCL
WBGene00015776	dct-1	C14F5.1	ENSG00000104765	BNIP3L	1	InParanoid
WBGene00015776	dct-1	C14F5.1	ENSG00000176171	BNIP3	2	InParanoid|OrthoMCL
WBGene00015955	None	C18B2.4	ENSG00000132471	WBP2	5	Ensembl Compara 87-89|InParanoid|OMA|OrthoInspector|OrthoMCL
WBGene00015955	None	C18B2.4	ENSG00000183066	WBP2NL	2	Ensembl Compara 87-89|OrthoInspector
WBGene00016064	acd-1	C24G7.2	ENSG00000072182	ASIC4	1	Ensembl Compara 87-89
WBGene00016064	acd-1	C24G7.2	ENSG00000108684	ASIC2	1	Ensembl Compara 87-89
WBGene00016064	acd-1	C24G7.2	ENSG00000110881	ASIC1	1	Ensembl Compara 87-89
WBGene00016064	acd-1	C24G7.2	ENSG00000213199	ASIC3	1	Ensembl Compara 87-89
WBGene00016064	acd-1	C24G7.2	ENSG00000256394	ASIC5	1	Ensembl Compara 87-89
WBGene00016406	None	C34D10.1	ENSG00000101928	MOSPD1	6	Ensembl Compara 87-89|Homologene|InParanoid|OMA|OrthoInspector|OrthoMCL
WBGene00016406	None	C34D10.1	ENSG00000106330	MOSPD3	3	Ensembl Compara 87-89|InParanoid|OrthoInspector
WBGene00016407	None	C34D10.2	ENSG00000059145	UNKL	4	Ensembl Compara 87-89|InParanoid|OrthoInspector|OrthoMCL
WBGene00016407	None	C34D10.2	ENSG00000132478	UNK	4	Ensembl Compara 87-89|InParanoid|OrthoInspector|OrthoMCL
WBGene00016489	None	C36E6.1	ENSG00000088247	KHSRP	4	Ensembl Compara 87-89|InParanoid|OMA|OrthoInspector
WBGene00016489	None	C36E6.1	ENSG00000107164	FUBP3	5	Ensembl Compara 87-89|Homologene|InParanoid|OMA|OrthoInspector
WBGene00016489	None	C36E6.1	ENSG00000162613	FUBP1	3	Ensembl Compara 87-89|InParanoid|OrthoInspector
WBGene00016507	abhd-5.2	C37H5.3	ENSG00000011198	ABHD5	5	Ensembl Compara 87-89|InParanoid|OMA|OrthoInspector|OrthoMCL
WBGene00016507	abhd-5.2	C37H5.3	ENSG00000100439	ABHD4	6	Ensembl Compara 87-89|Homologene|InParanoid|OMA|OrthoInspector|OrthoMCL
WBGene00016769	None	C49C8.5	ENSG00000187151	ANGPTL5	1	InParanoid
WBGene00016769	None	C49C8.5	ENSG00000091879	ANGPT2	1	InParanoid
WBGene00016769	None	C49C8.5	ENSG00000101280	ANGPT4	1	InParanoid
WBGene00016769	None	C49C8.5	ENSG00000116194	ANGPTL1	1	InParanoid
WBGene00016769	None	C49C8.5	ENSG00000127951	FGL2	1	InParanoid
WBGene00016769	None	C49C8.5	ENSG00000136859	ANGPTL2	1	InParanoid
WBGene00016769	None	C49C8.5	ENSG00000154188	ANGPT1	1	InParanoid
WBGene00016769	None	C49C8.5	ENSG00000171557	FGG	1	InParanoid
WBGene00016769	None	C49C8.5	ENSG00000171564	FGB	1	InParanoid
WBGene00016769	None	C49C8.5	ENSG00000171819	ANGPTL7	1	InParanoid
WBGene00016845	None	C50F7.5	ENSG00000178928	TPRX1	1	OrthoMCL
WBGene00016968	epg-5	C56C10.12	ENSG00000152223	EPG5	5	Ensembl Compara 87-89|Homologene|InParanoid|OrthoInspector|OrthoMCL
WBGene00016997	cebp-1	D1005.3	ENSG00000092067	CEBPE	0	Legacy Ortholist
WBGene00016997	cebp-1	D1005.3	ENSG00000221869	CEBPD	0	Legacy Ortholist
WBGene00017016	snap-1	D1014.3	ENSG00000105402	NAPA	6	Ensembl Compara 87-89|Homologene|InParanoid|OMA|OrthoInspector|OrthoMCL
WBGene00017016	snap-1	D1014.3	ENSG00000125814	NAPB	5	Ensembl Compara 87-89|InParanoid|OMA|OrthoInspector|OrthoMCL
WBGene00017028	dex-1	D1044.2	ENSG00000165973	NELL1	1	Ensembl Compara 87-89
WBGene00017028	dex-1	D1044.2	ENSG00000184613	NELL2	1	Ensembl Compara 87-89
WBGene00017045	atg-13	D2007.5	ENSG00000175224	ATG13	2	Ensembl Compara 87-89|OrthoInspector
WBGene00017571	jmjd-3.1	F18E9.5	ENSG00000132510	KDM6B	1	Ensembl Compara 87-89
WBGene00017571	jmjd-3.1	F18E9.5	ENSG00000147050	KDM6A	1	Ensembl Compara 87-89
WBGene00017571	jmjd-3.1	F18E9.5	ENSG00000183878	UTY	1	Ensembl Compara 87-89
WBGene00017705	None	F22E5.6	ENSG00000151364	KCTD14	1	Ensembl Compara 87-89
WBGene00017705	None	F22E5.6	ENSG00000243335	KCTD7	2	Ensembl Compara 87-89|InParanoid
WBGene00017705	None	F22E5.6	ENSG00000168301	KCTD6	1	InParanoid
WBGene00018011	None	F33E11.3	ENSG00000162869	PPP1R21	4	Ensembl Compara 87-89|InParanoid|OMA|OrthoMCL
WBGene00018294	atg-18	F41E6.13	ENSG00000070540	WIPI1	5	Ensembl Compara 87-89|InParanoid|OMA|OrthoInspector|OrthoMCL
WBGene00018294	atg-18	F41E6.13	ENSG00000157954	WIPI2	6	Ensembl Compara 87-89|Homologene|InParanoid|OMA|OrthoInspector|OrthoMCL
WBGene00018564	None	F47D12.9	ENSG00000119599	None	0	Legacy Ortholist
WBGene00018564	None	F47D12.9	ENSG00000176566	None	0	Legacy Ortholist
WBGene00018564	None	F47D12.9	ENSG00000182308	None	0	Legacy Ortholist
WBGene00018738	swip-10	F53B1.6	ENSG00000214309	MBLAC1	3	Ensembl Compara 87-89|OrthoInspector|OrthoMCL
WBGene00018953	None	F56C9.10	ENSG00000141376	BCAS3	5	Ensembl Compara 87-89|InParanoid|OMA|OrthoInspector|OrthoMCL
WBGene00019006	spg-20	F57B10.9	ENSG00000133104	SPG20	5	Ensembl Compara 87-89|Homologene|InParanoid|OrthoInspector|OrthoMCL
WBGene00019146	None	H02F09.3	ENSG00000145113	MUC4	1	OrthoMCL
WBGene00019146	None	H02F09.3	ENSG00000181143	MUC16	1	OrthoMCL
WBGene00019146	None	H02F09.3	ENSG00000205277	MUC12	1	OrthoMCL
WBGene00019146	None	H02F09.3	ENSG00000110799	VWF	1	OrthoMCL
WBGene00019146	None	H02F09.3	ENSG00000117983	MUC5B	1	OrthoMCL
WBGene00019146	None	H02F09.3	ENSG00000165899	OTOGL	1	OrthoMCL
WBGene00019146	None	H02F09.3	ENSG00000169876	MUC17	1	OrthoMCL
WBGene00019146	None	H02F09.3	ENSG00000184956	MUC6	1	OrthoMCL
WBGene00019146	None	H02F09.3	ENSG00000188162	OTOG	1	OrthoMCL
WBGene00019146	None	H02F09.3	ENSG00000197558	SSPO	1	OrthoMCL
WBGene00019146	None	H02F09.3	ENSG00000198788	None	1	OrthoMCL
WBGene00019146	None	H02F09.3	ENSG00000205592	None	1	OrthoMCL
WBGene00019273	None	H43E16.1	ENSG00000145113	MUC4	1	OrthoMCL
WBGene00019273	None	H43E16.1	ENSG00000102804	TSC22D1	1	OMA
WBGene00019273	None	H43E16.1	ENSG00000181143	MUC16	1	OrthoMCL
WBGene00019273	None	H43E16.1	ENSG00000205277	MUC12	1	OrthoMCL
WBGene00019273	None	H43E16.1	ENSG00000110799	VWF	1	OrthoMCL
WBGene00019273	None	H43E16.1	ENSG00000117983	MUC5B	1	OrthoMCL
WBGene00019273	None	H43E16.1	ENSG00000165899	OTOGL	1	OrthoMCL
WBGene00019273	None	H43E16.1	ENSG00000169876	MUC17	1	OrthoMCL
WBGene00019273	None	H43E16.1	ENSG00000184956	MUC6	1	OrthoMCL
WBGene00019273	None	H43E16.1	ENSG00000188162	OTOG	1	OrthoMCL
WBGene00019273	None	H43E16.1	ENSG00000197558	SSPO	1	OrthoMCL
WBGene00019273	None	H43E16.1	ENSG00000198788	None	1	OrthoMCL
WBGene00019273	None	H43E16.1	ENSG00000205592	None	1	OrthoMCL
WBGene00019298	None	K02D7.1	ENSG00000198805	PNP	6	Ensembl Compara 87-89|Homologene|InParanoid|OMA|OrthoInspector|OrthoMCL
WBGene00019686	None	K12H6.6	ENSG00000160606	TLCD1	3	Ensembl Compara 87-89|InParanoid|OrthoInspector
WBGene00019686	None	K12H6.6	ENSG00000185561	TLCD2	3	Ensembl Compara 87-89|OrthoInspector|OrthoMCL
WBGene00019686	None	K12H6.6	ENSG00000275246	TLCD2	1	OrthoInspector
WBGene00019748	atg-2	M03A8.2	ENSG00000066739	ATG2B	5	Ensembl Compara 87-89|InParanoid|OMA|OrthoInspector|OrthoMCL
WBGene00019748	atg-2	M03A8.2	ENSG00000110046	ATG2A	6	Ensembl Compara 87-89|Homologene|InParanoid|OMA|OrthoInspector|OrthoMCL
WBGene00019782	None	M60.7	ENSG00000100628	ASB2	2	Ensembl Compara 87-89|InParanoid
WBGene00019782	None	M60.7	ENSG00000115239	ASB3	2	Ensembl Compara 87-89|InParanoid
WBGene00019782	None	M60.7	ENSG00000146809	ASB15	2	Ensembl Compara 87-89|InParanoid
WBGene00019782	None	M60.7	ENSG00000239388	ASB14	3	Ensembl Compara 87-89|InParanoid|OMA
WBGene00019782	None	M60.7	ENSG00000270898	GPR75-ASB3	1	Ensembl Compara 87-89
WBGene00019782	None	M60.7	ENSG00000278693	ASB2	1	InParanoid
WBGene00019823	fnta-1	R02D3.5	ENSG00000168522	FNTA	6	Ensembl Compara 87-89|Homologene|InParanoid|OMA|OrthoInspector|OrthoMCL
WBGene00019823	fnta-1	R02D3.5	ENSG00000254673	None	1	OrthoInspector
WBGene00019831	None	R02F2.1	ENSG00000113328	CCNG1	1	InParanoid
WBGene00019831	None	R02F2.1	ENSG00000118816	CCNI	4	InParanoid|OMA|OrthoInspector|OrthoMCL
WBGene00019831	None	R02F2.1	ENSG00000138764	CCNG2	1	InParanoid
WBGene00019831	None	R02F2.1	ENSG00000205089	CCNI2	1	InParanoid
WBGene00019844	abts-4	R03E9.3	ENSG00000004939	SLC4A1	1	Ensembl Compara 87-89
WBGene00019844	abts-4	R03E9.3	ENSG00000114923	SLC4A3	1	Ensembl Compara 87-89
WBGene00019844	abts-4	R03E9.3	ENSG00000164889	SLC4A2	1	Ensembl Compara 87-89
WBGene00019895	aagr-2	R05F9.12	ENSG00000090402	SI	3	Ensembl Compara 87-89|OrthoInspector|OrthoMCL
WBGene00019895	aagr-2	R05F9.12	ENSG00000257335	MGAM	4	Ensembl Compara 87-89|Homologene|InParanoid|OrthoInspector
WBGene00019895	aagr-2	R05F9.12	ENSG00000257743	MGAM2	2	Ensembl Compara 87-89|OrthoInspector
WBGene00019895	aagr-2	R05F9.12	ENSG00000171298	GAA	3	InParanoid|OrthoInspector|OrthoMCL
WBGene00019895	aagr-2	R05F9.12	ENSG00000278563	MGAM2	1	OrthoInspector
WBGene00019902	None	R05G6.10	ENSG00000138670	RASGEF1B	6	Ensembl Compara 87-89|Homologene|InParanoid|OMA|OrthoInspector|OrthoMCL
WBGene00019902	None	R05G6.10	ENSG00000146090	RASGEF1C	5	Ensembl Compara 87-89|InParanoid|OMA|OrthoInspector|OrthoMCL
WBGene00019902	None	R05G6.10	ENSG00000198915	RASGEF1A	3	Ensembl Compara 87-89|InParanoid|OrthoInspector
WBGene00019946	chat-1	R08C7.2	ENSG00000112697	TMEM30A	5	Ensembl Compara 87-89|Homologene|InParanoid|OrthoInspector|OrthoMCL
WBGene00019946	chat-1	R08C7.2	ENSG00000182107	TMEM30B	3	Ensembl Compara 87-89|InParanoid|OrthoInspector
WBGene00020481	None	T13C2.6	ENSG00000130164	LDLR	4	Ensembl Compara 87-89|InParanoid|OMA|OrthoMCL
WBGene00020481	None	T13C2.6	ENSG00000147852	VLDLR	6	Ensembl Compara 87-89|Homologene|InParanoid|OMA|OrthoInspector|OrthoMCL
WBGene00020481	None	T13C2.6	ENSG00000157193	LRP8	4	Ensembl Compara 87-89|InParanoid|OMA|OrthoMCL
WBGene00020784	tat-4	T24H7.5	ENSG00000118322	ATP10B	2	Ensembl Compara 87-89|OrthoMCL
WBGene00020784	tat-4	T24H7.5	ENSG00000145246	ATP10D	2	Ensembl Compara 87-89|OrthoMCL
WBGene00020784	tat-4	T24H7.5	ENSG00000206190	ATP10A	2	Ensembl Compara 87-89|OrthoMCL
WBGene00021121	None	W09G12.7	ENSG00000179083	FAM133A	0	Legacy Ortholist
WBGene00021121	None	W09G12.7	ENSG00000183035	None	0	Legacy Ortholist
WBGene00021121	None	W09G12.7	ENSG00000234545	FAM133B	0	Legacy Ortholist
WBGene00021469	None	Y39G10AR.11	ENSG00000278247	GOLGA6L1	1	OMA
WBGene00021475	tbca-1	Y39G10AR.20	ENSG00000171530	TBCA	5	Ensembl Compara 87-89|InParanoid|OMA|OrthoInspector|OrthoMCL
WBGene00021883	None	Y54G2A.18	ENSG00000075790	BCAP29	4	Ensembl Compara 87-89|InParanoid|OrthoInspector|OrthoMCL
WBGene00021883	None	Y54G2A.18	ENSG00000185825	BCAP31	6	Ensembl Compara 87-89|Homologene|InParanoid|OMA|OrthoInspector|OrthoMCL
WBGene00021927	abhd-14	Y55F3AM.10	ENSG00000114786	ABHD14A-ACY1	1	OrthoMCL
WBGene00021927	abhd-14	Y55F3AM.10	ENSG00000114779	ABHD14B	6	Ensembl Compara 87-89|Homologene|InParanoid|OMA|OrthoInspector|OrthoMCL
WBGene00021927	abhd-14	Y55F3AM.10	ENSG00000248487	ABHD14A	4	Ensembl Compara 87-89|InParanoid|OMA|OrthoInspector
WBGene00022078	epg-9	Y69A2AR.7	ENSG00000123395	ATG101	6	Ensembl Compara 87-89|Homologene|InParanoid|OMA|OrthoInspector|OrthoMCL
WBGene00022425	plst-1	Y104H12BR.1	ENSG00000102024	PLS3	4	Ensembl Compara 87-89|InParanoid|OrthoInspector|OrthoMCL
WBGene00022425	plst-1	Y104H12BR.1	ENSG00000120756	PLS1	4	Ensembl Compara 87-89|InParanoid|OrthoInspector|OrthoMCL
WBGene00022425	plst-1	Y104H12BR.1	ENSG00000136167	LCP1	5	Ensembl Compara 87-89|Homologene|InParanoid|OrthoInspector|OrthoMCL
WBGene00022499	set-30	ZC8.3	ENSG00000115593	SMYD1	2	Ensembl Compara 87-89|OrthoInspector
WBGene00022499	set-30	ZC8.3	ENSG00000143499	SMYD2	3	Ensembl Compara 87-89|OMA|OrthoInspector
WBGene00022499	set-30	ZC8.3	ENSG00000185420	SMYD3	3	Ensembl Compara 87-89|Homologene|OrthoInspector
WBGene00022570	sdz-35	ZC239.12	ENSG00000151364	KCTD14	1	Ensembl Compara 87-89
WBGene00022570	sdz-35	ZC239.12	ENSG00000243335	KCTD7	2	Ensembl Compara 87-89|InParanoid
WBGene00022570	sdz-35	ZC239.12	ENSG00000168301	KCTD6	1	InParanoid
WBGene00022797	best-24	ZK688.2	ENSG00000039987	BEST2	4	Ensembl Compara 87-89|InParanoid|OrthoInspector|OrthoMCL
WBGene00022797	best-24	ZK688.2	ENSG00000127325	BEST3	3	Ensembl Compara 87-89|OrthoInspector|OrthoMCL
WBGene00022797	best-24	ZK688.2	ENSG00000142959	BEST4	3	Ensembl Compara 87-89|InParanoid|OrthoInspector
WBGene00022797	best-24	ZK688.2	ENSG00000167995	BEST1	3	Ensembl Compara 87-89|InParanoid|OrthoInspector
